# Supplementary material for: Design, Synthesis, and Evaluation of Dihydropyranopyrazole Derivatives as Novel PDE2 Inhibitors for the Treatment of Alzheimer’s Disease
Source: MDPI journal article supplement (doi:10.3390/molecules26103034), 2021-05-19
Supplement: s1 [file s1]

# Design, Synthesis and Activity Evaluation of Dihydropyranopyrazole PDE2 inhibitors

Yan Zhou<sup>1</sup>, Jinjian Li<sup>1</sup>, Han Yuan<sup>1</sup>, Rui Su<sup>1</sup>, Yue Huang<sup>1</sup>, Yiyong Huang<sup>1</sup>,  
Zhe Li<sup>1</sup>, Yinuo Wu<sup>1</sup>, Hai-Bin Luo<sup>1,2</sup>, Chen Zhang<sup>1\*</sup>, Ling Huang<sup>1,2\*</sup>

<sup>1</sup> *School of Pharmaceutical Sciences, Sun Yat-Sen University, Guangzhou 510006, PR China*

<sup>2</sup> *School of Pharmaceutical Sciences, Hainan University, Haikou, 510006, PR China*

Corresponding author. E-mail address: [zhangch328@mail.sysu.edu.cn](mailto:zhangch328@mail.sysu.edu.cn) (C. Zhang), [huangl72@mail.sysu.edu.cn](mailto:huangl72@mail.sysu.edu.cn) (L. Huang).

## Table of Contents:

|                                                                                |     |
|--------------------------------------------------------------------------------|-----|
| 1. <sup>1</sup> HNMR and <sup>13</sup> CNMR spectrums of tested compounds..... | S2  |
| 2. HRMS spectra of target compounds.....                                       | S32 |
| 3. Chiral Resolution of Compound <b>11h</b> .....                              | S60 |

1.  $^1\text{H}$ NMR and  $^{13}\text{C}$ NMR spectra of the targeted compounds.

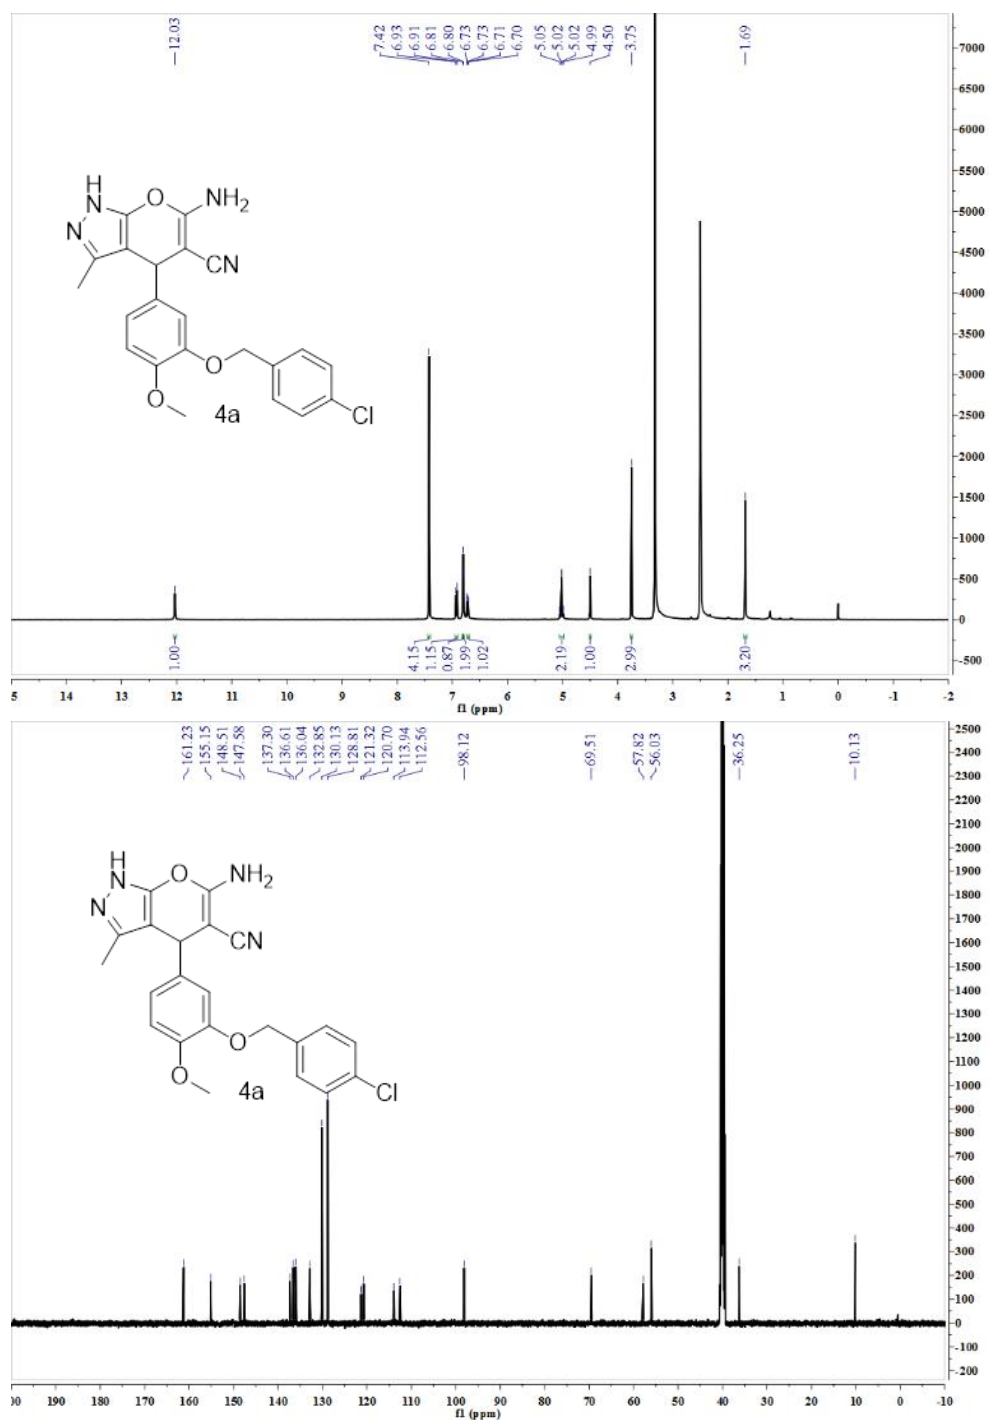

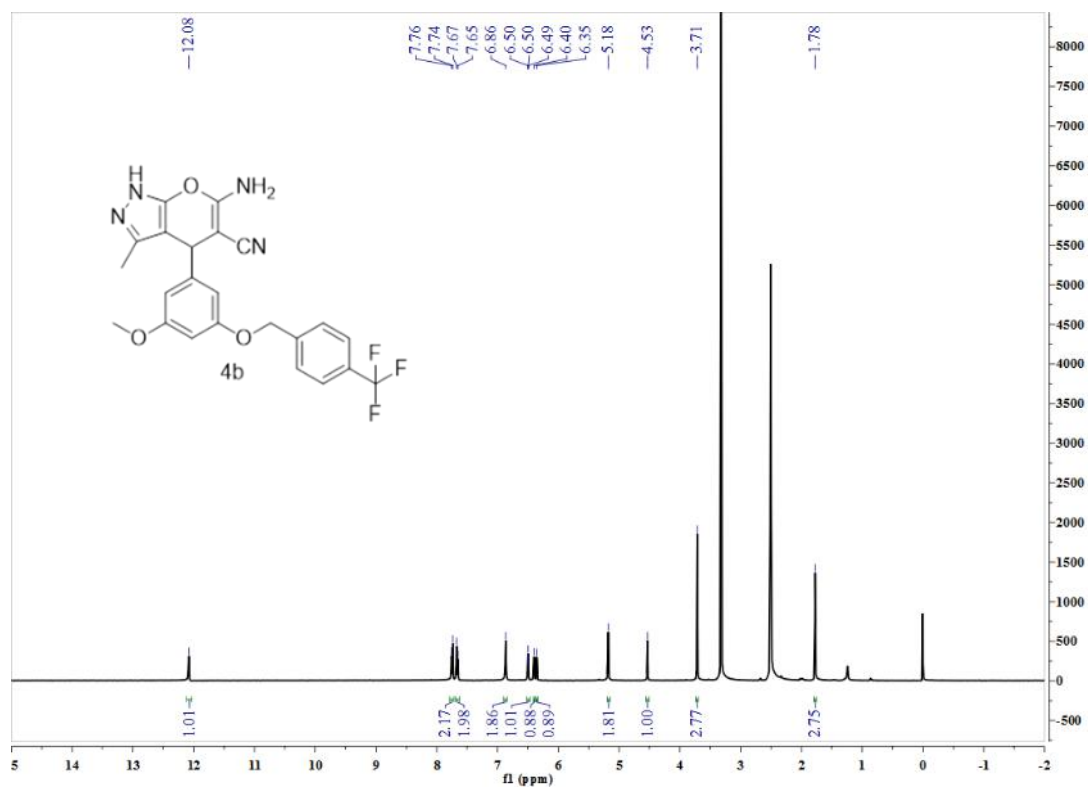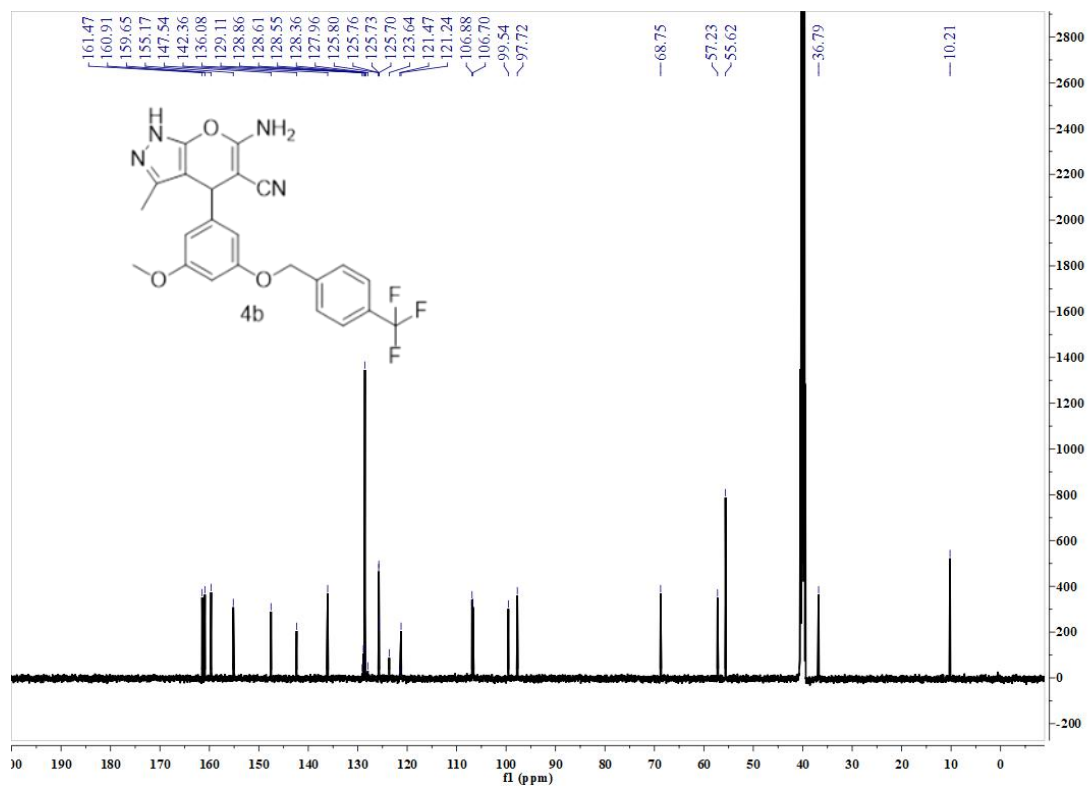

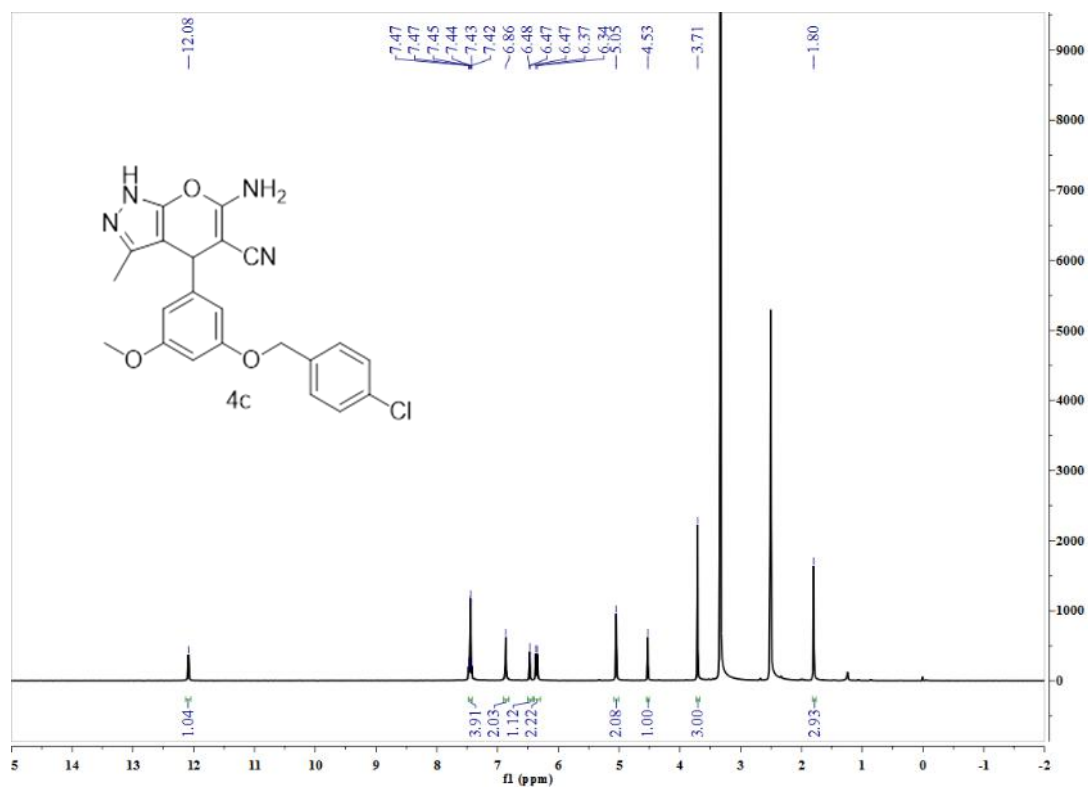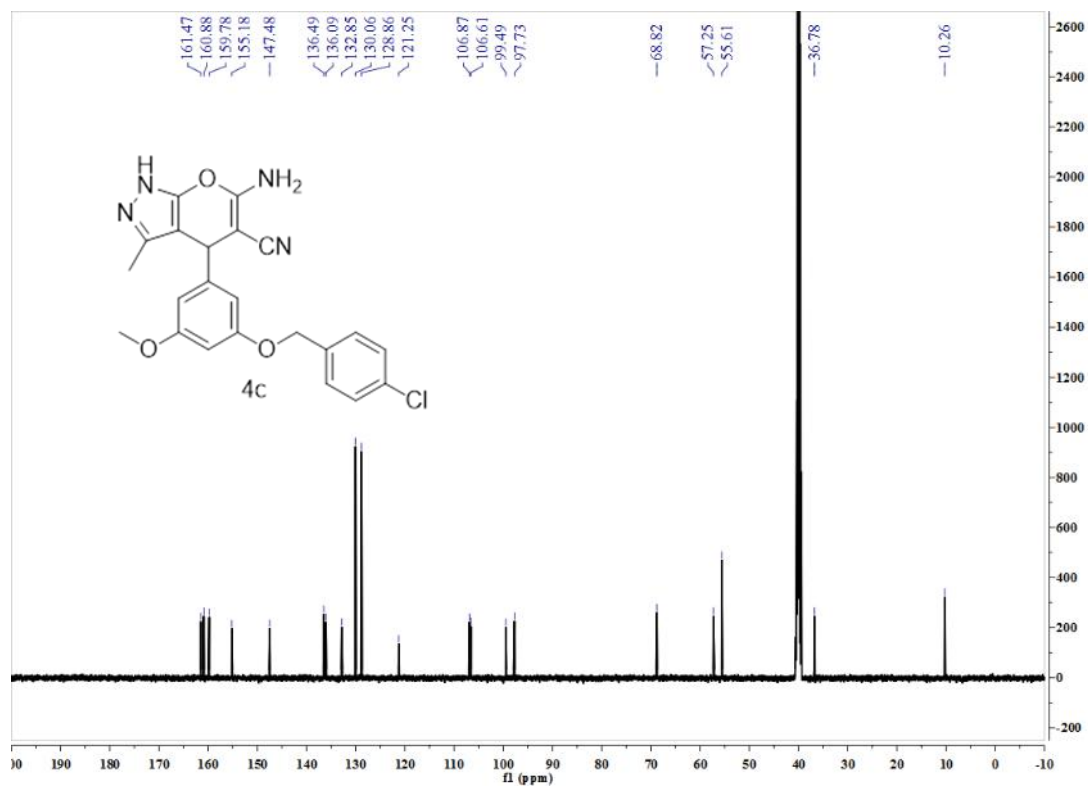

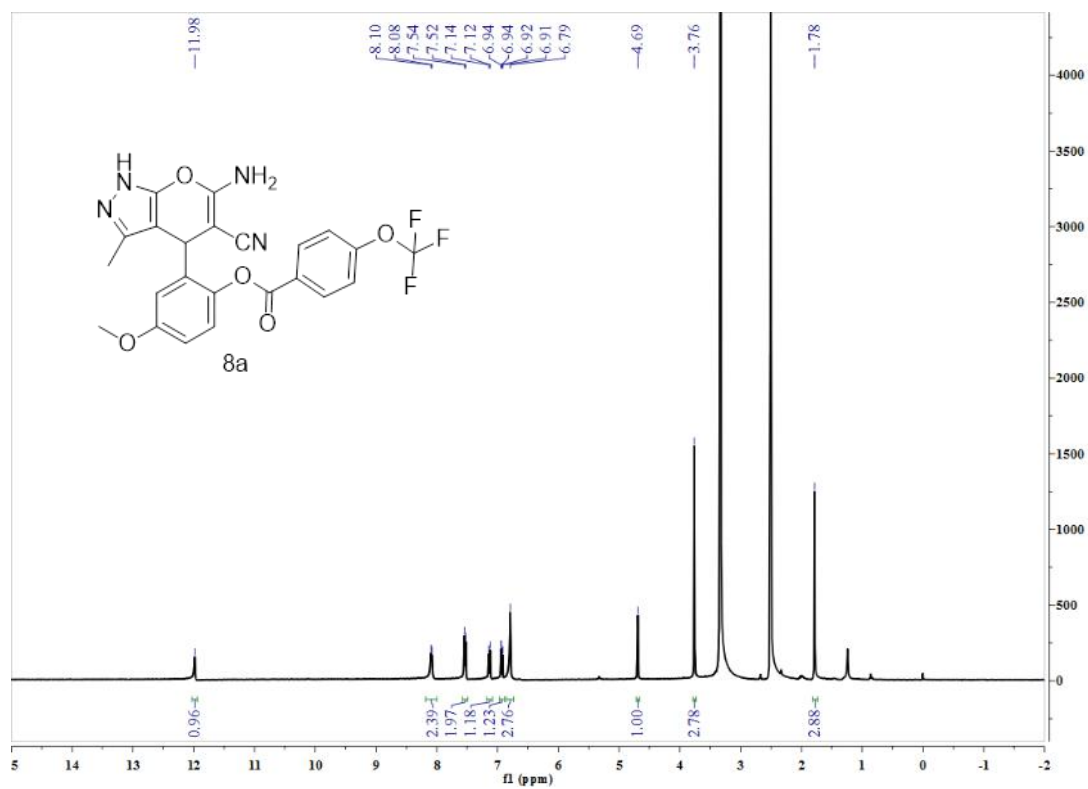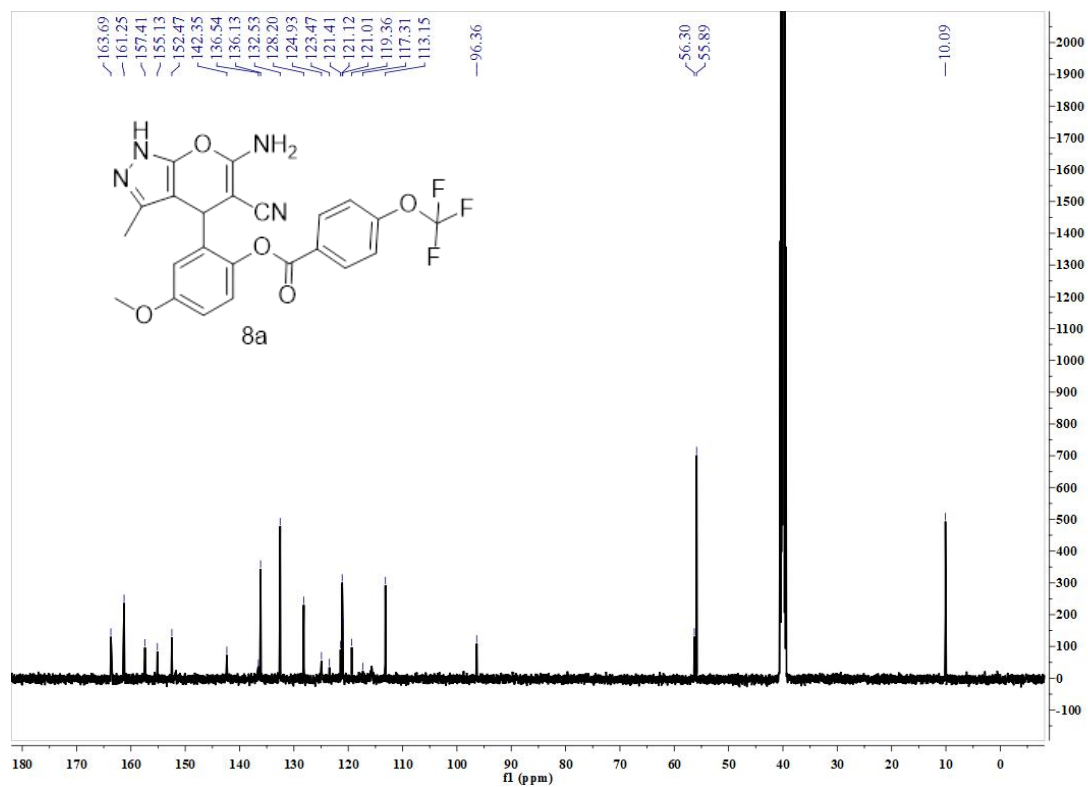

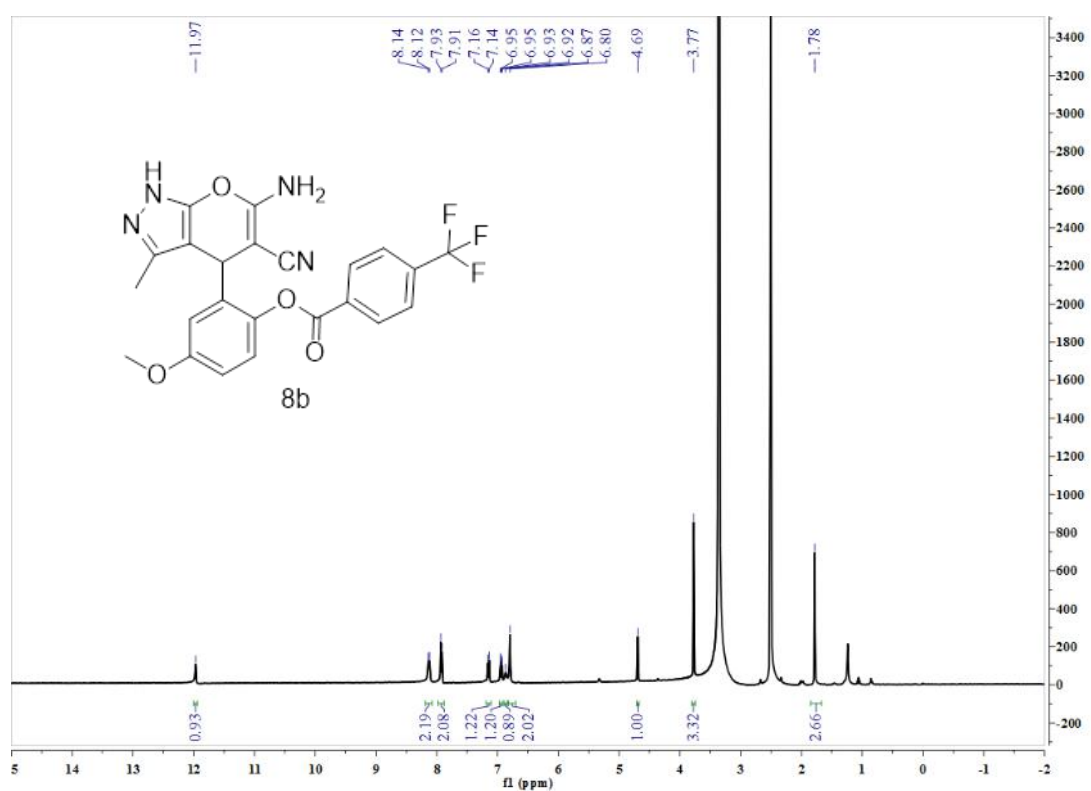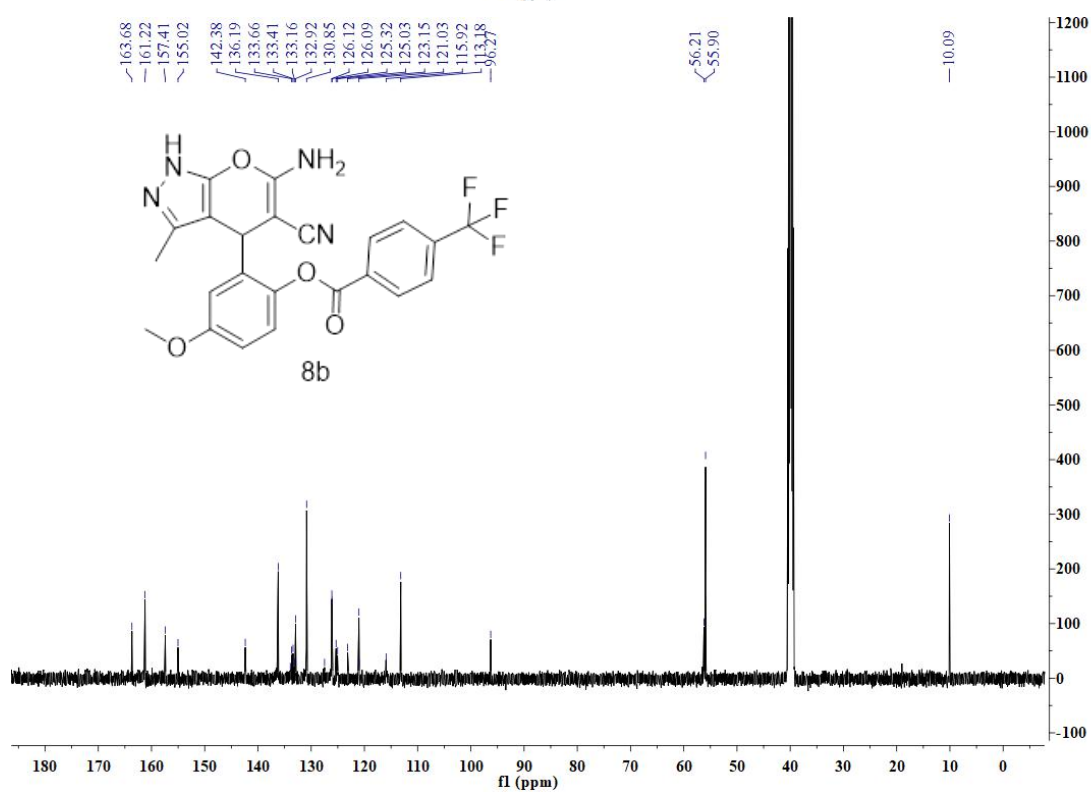

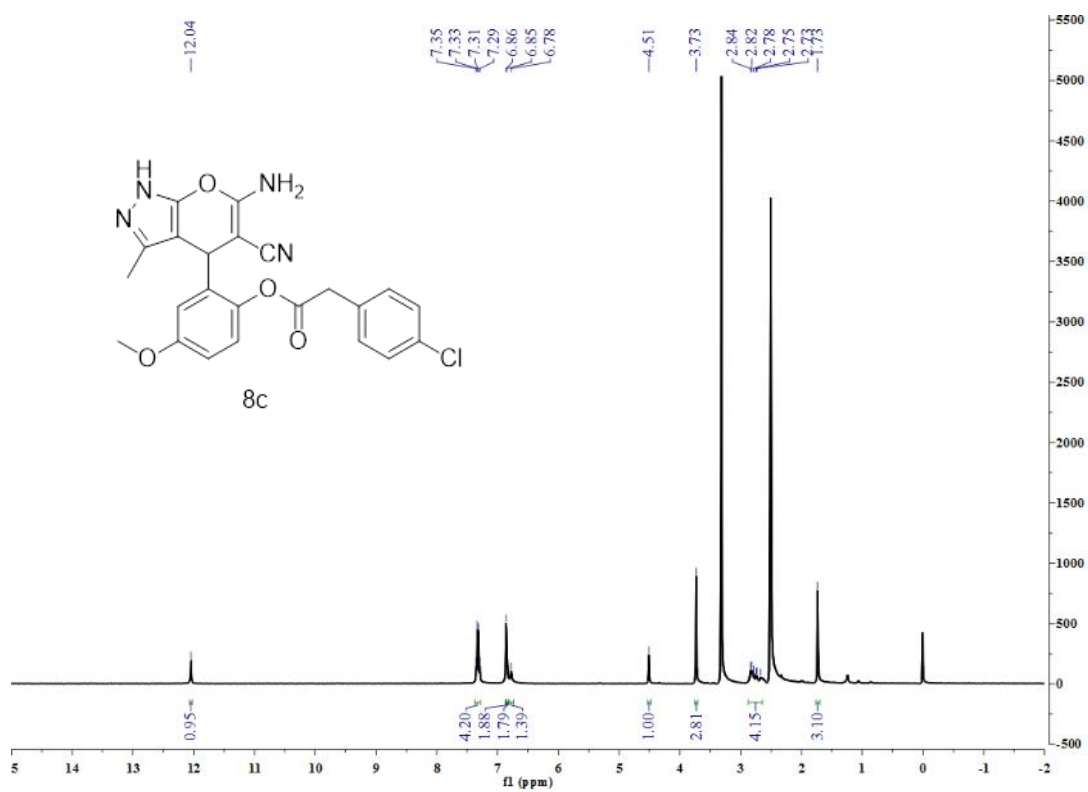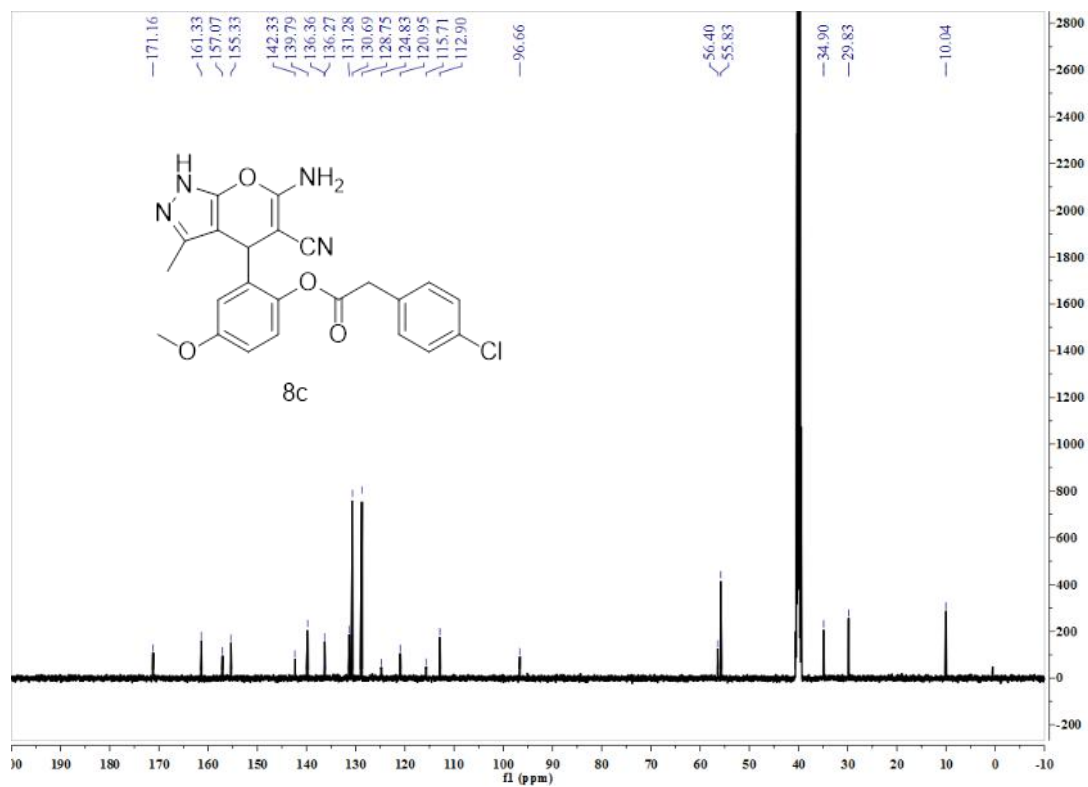

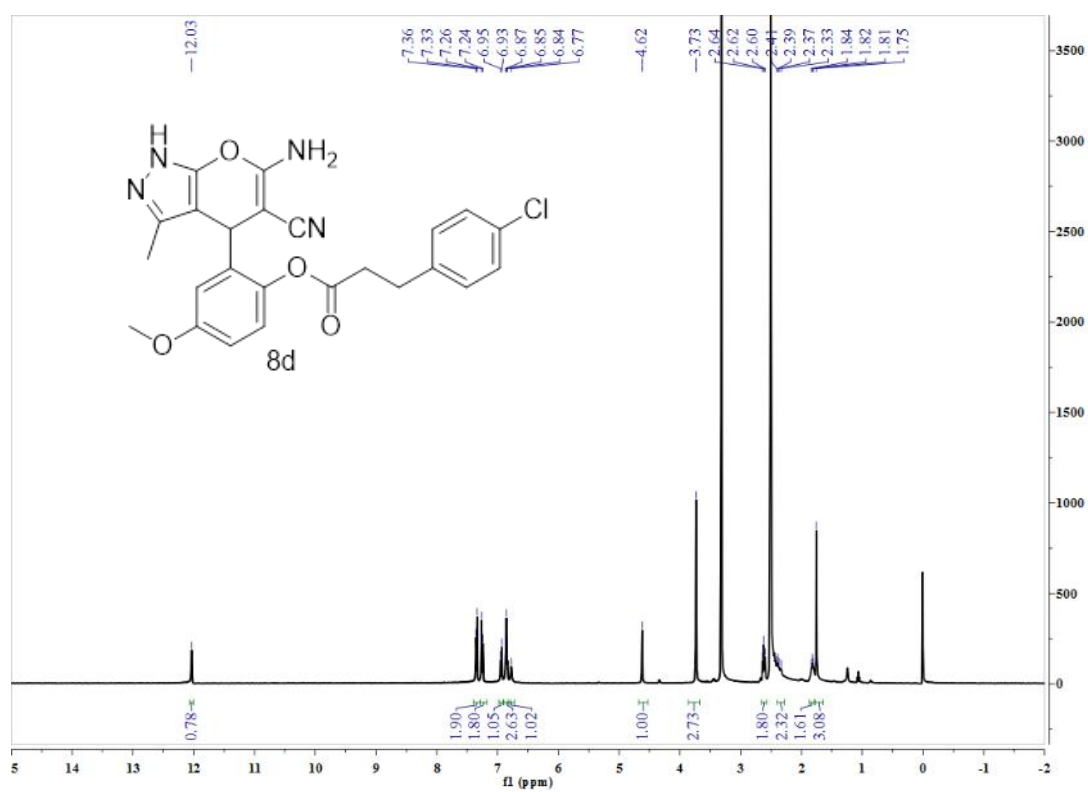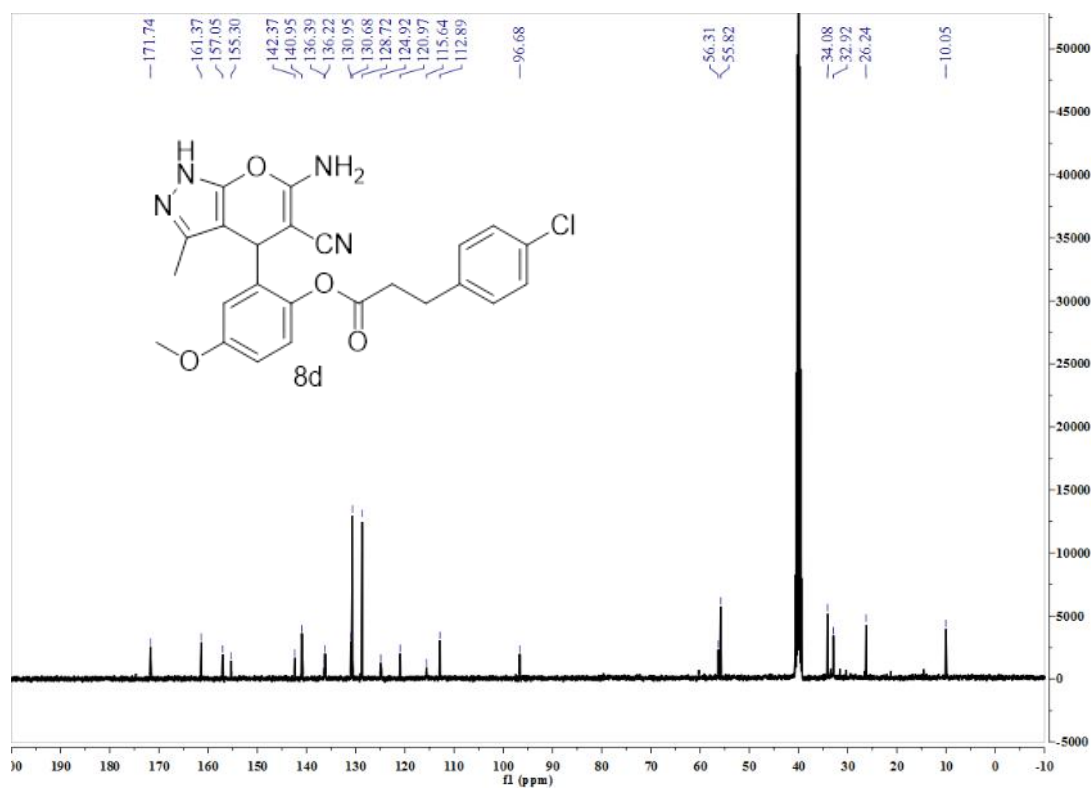



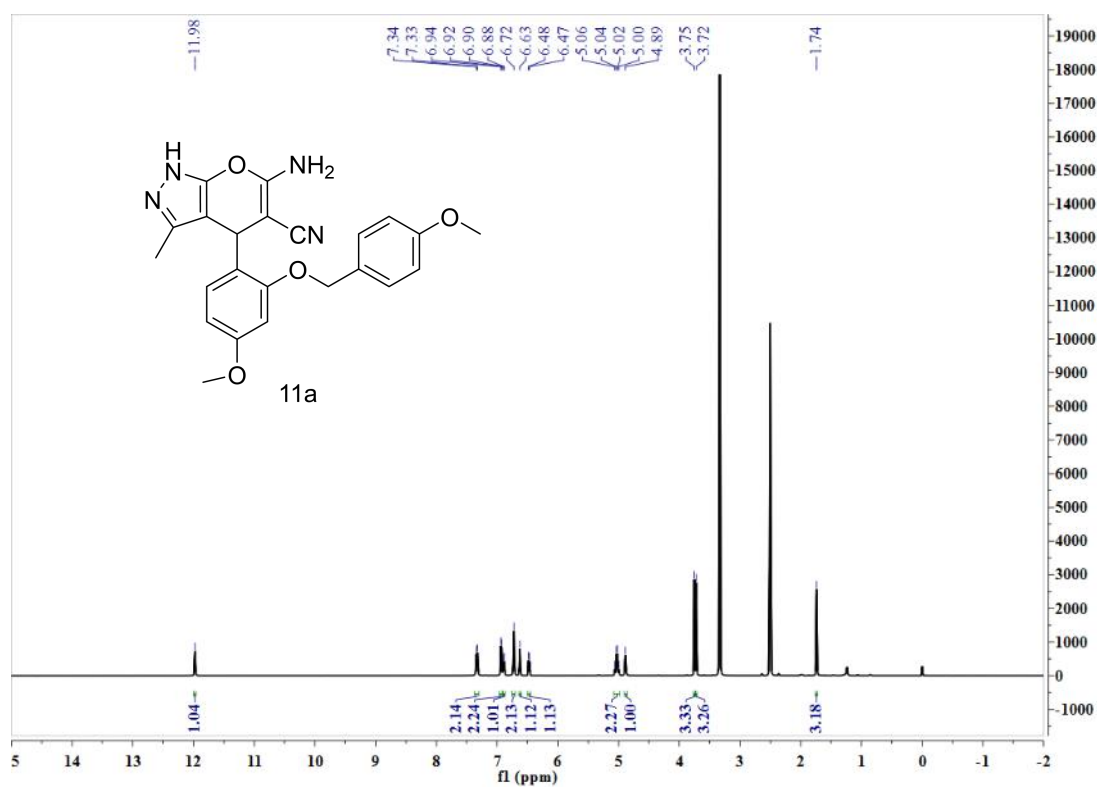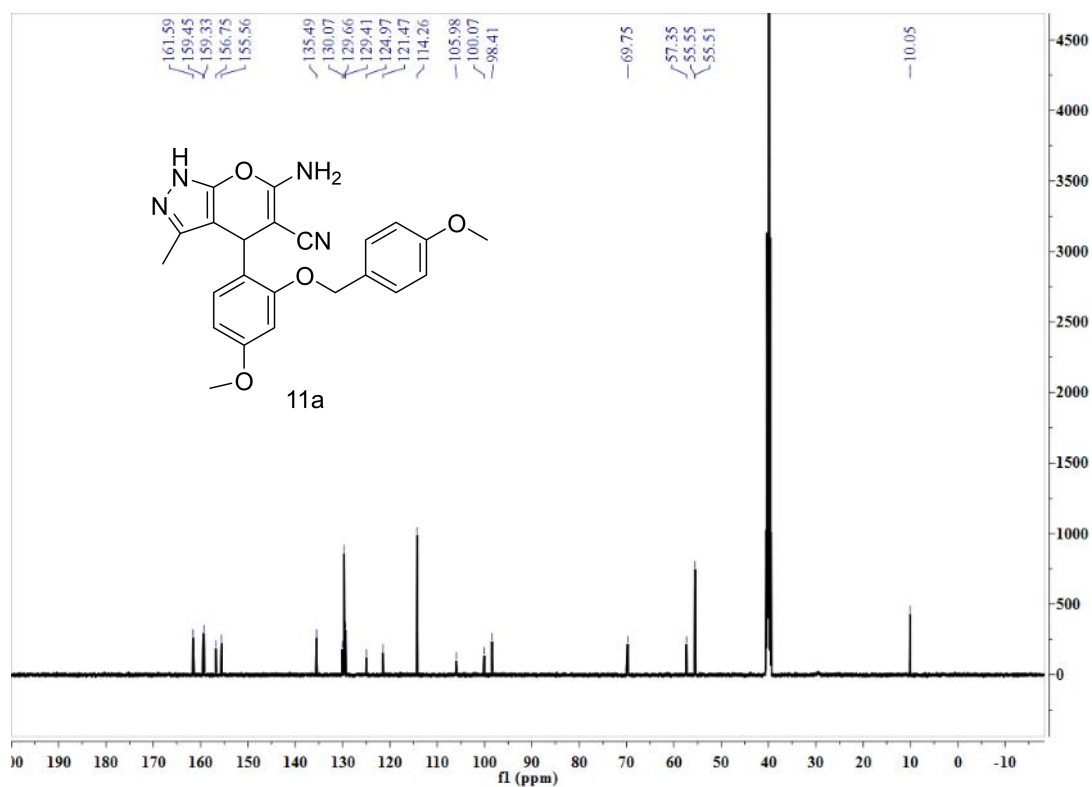

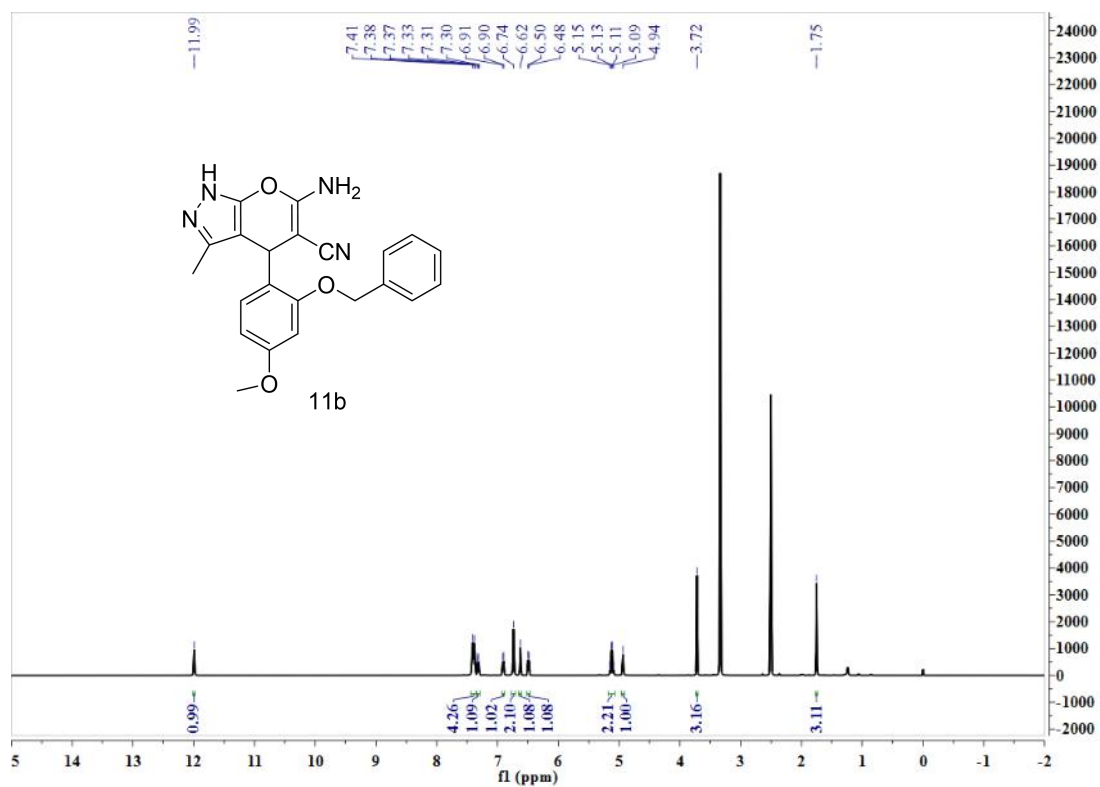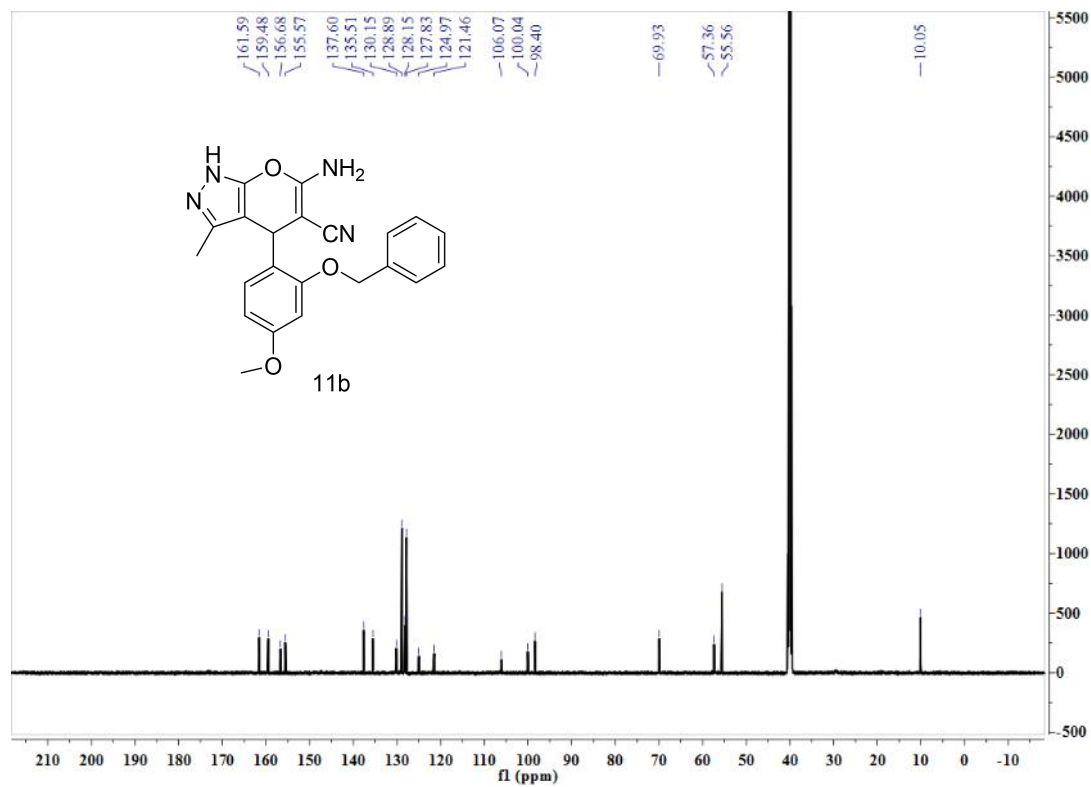

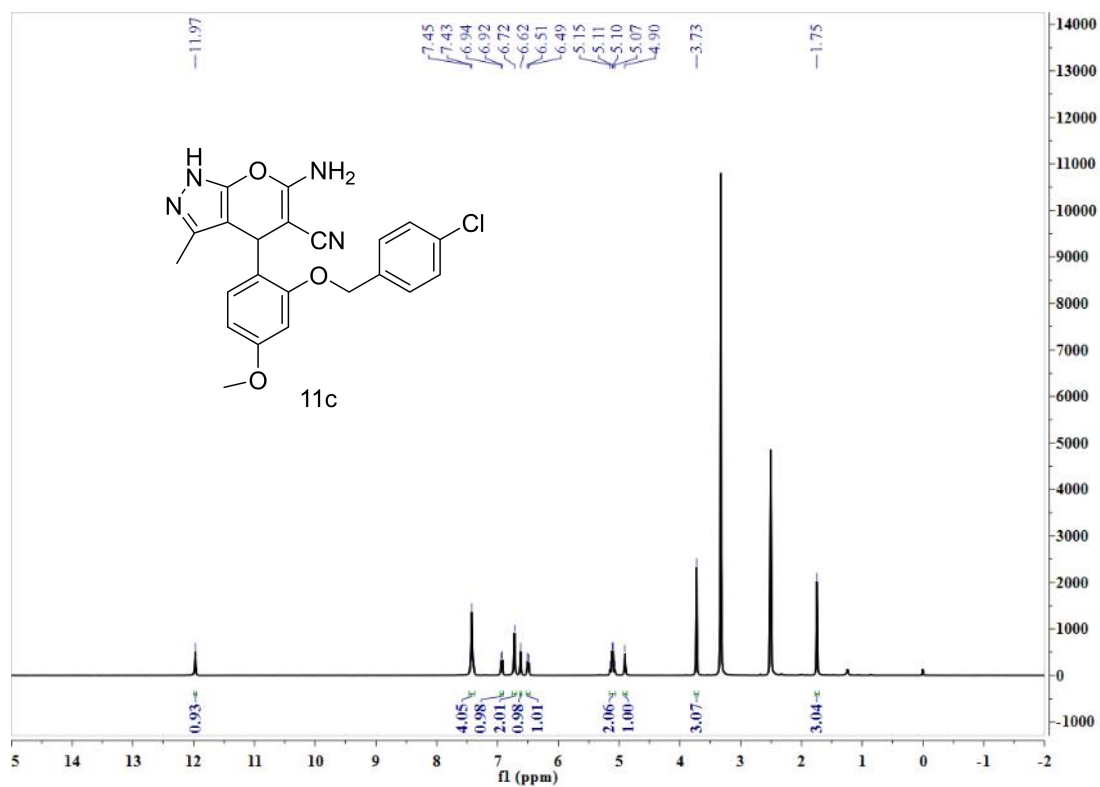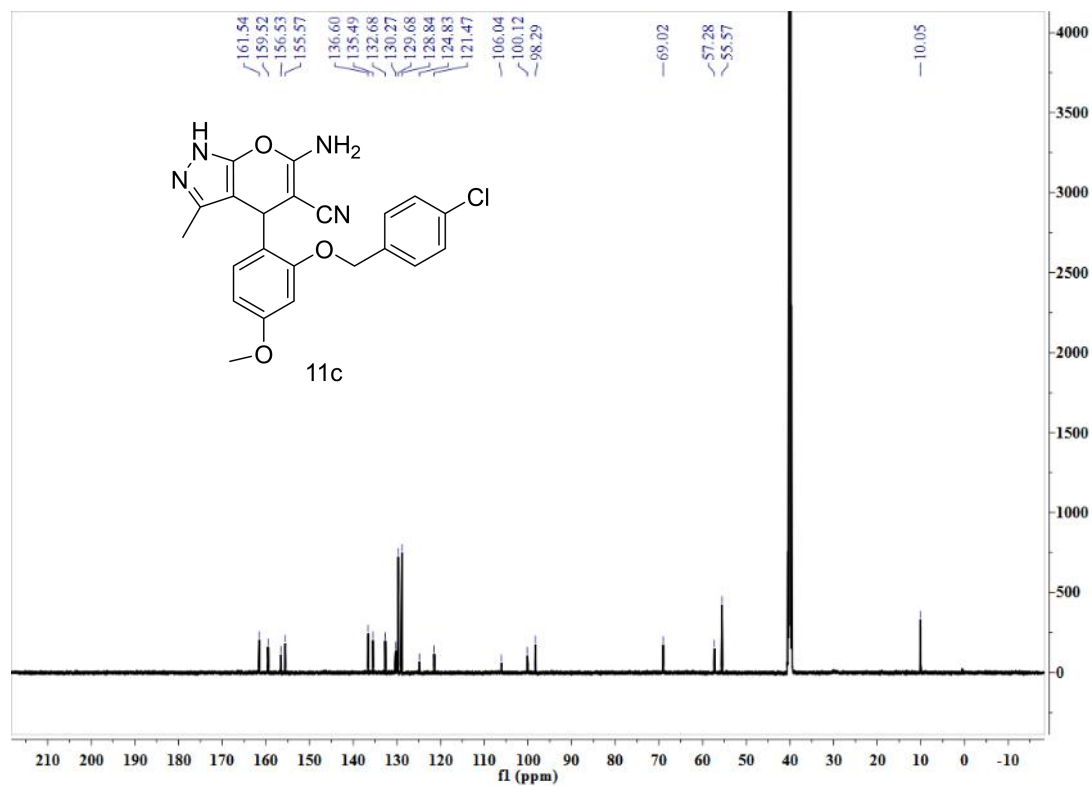

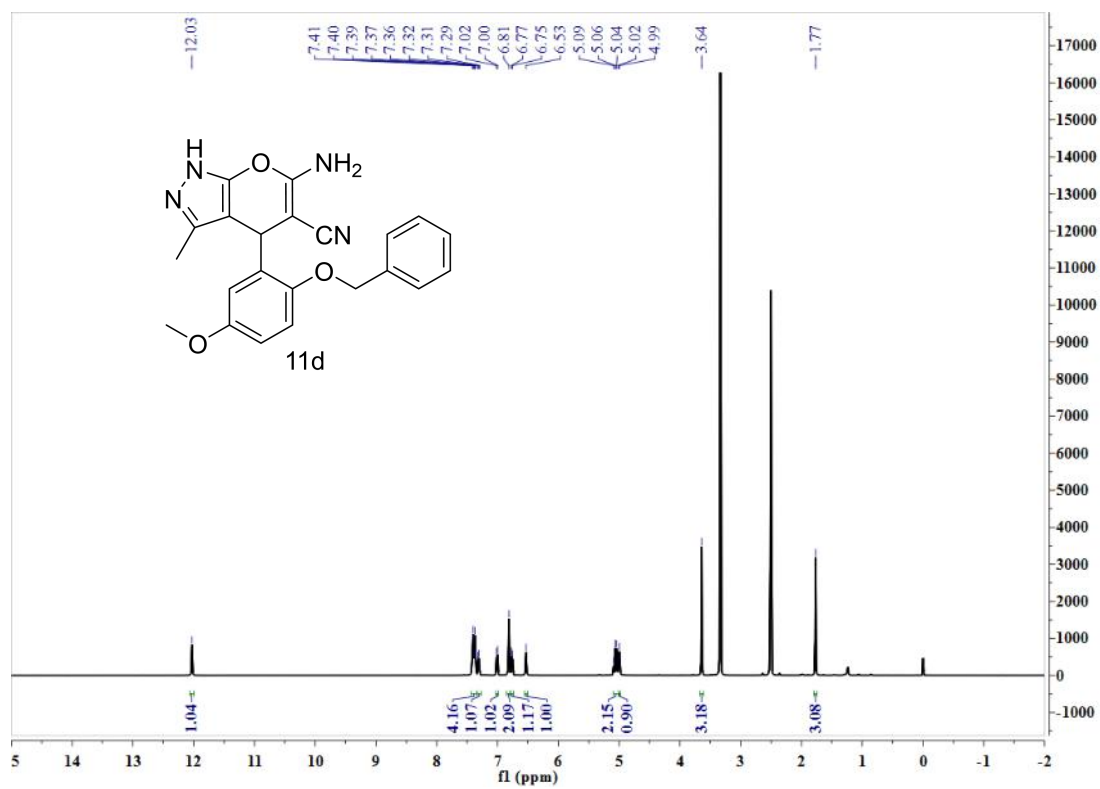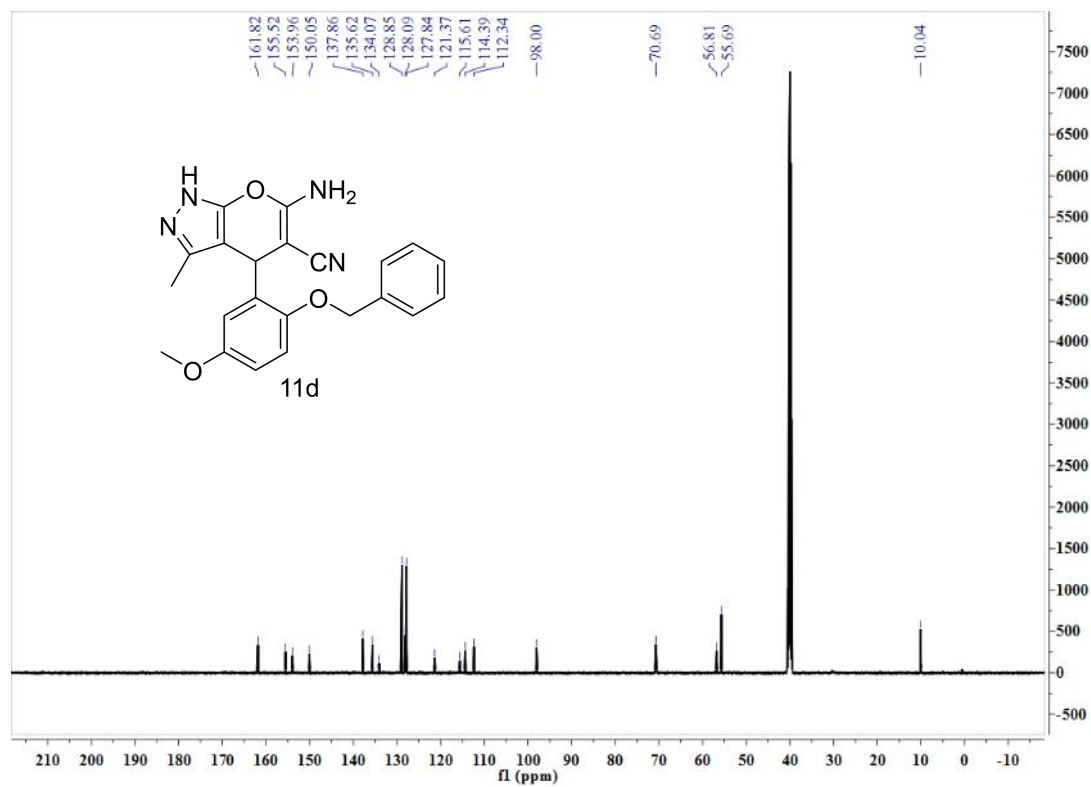

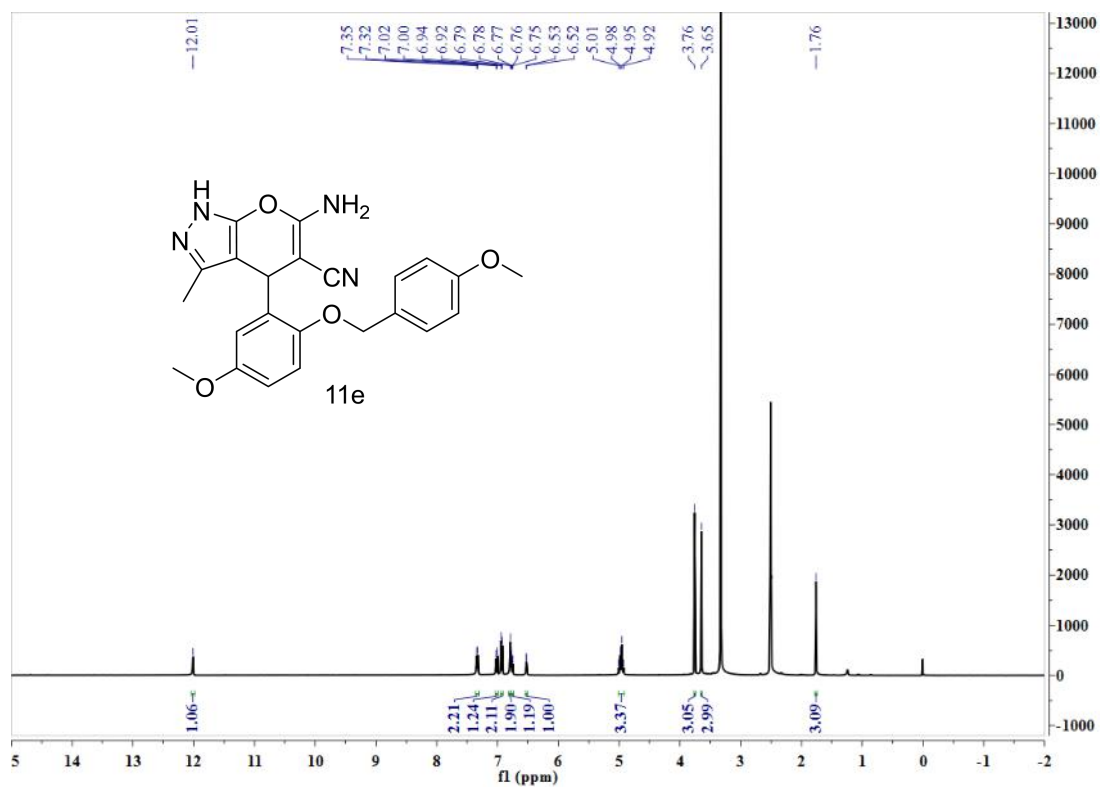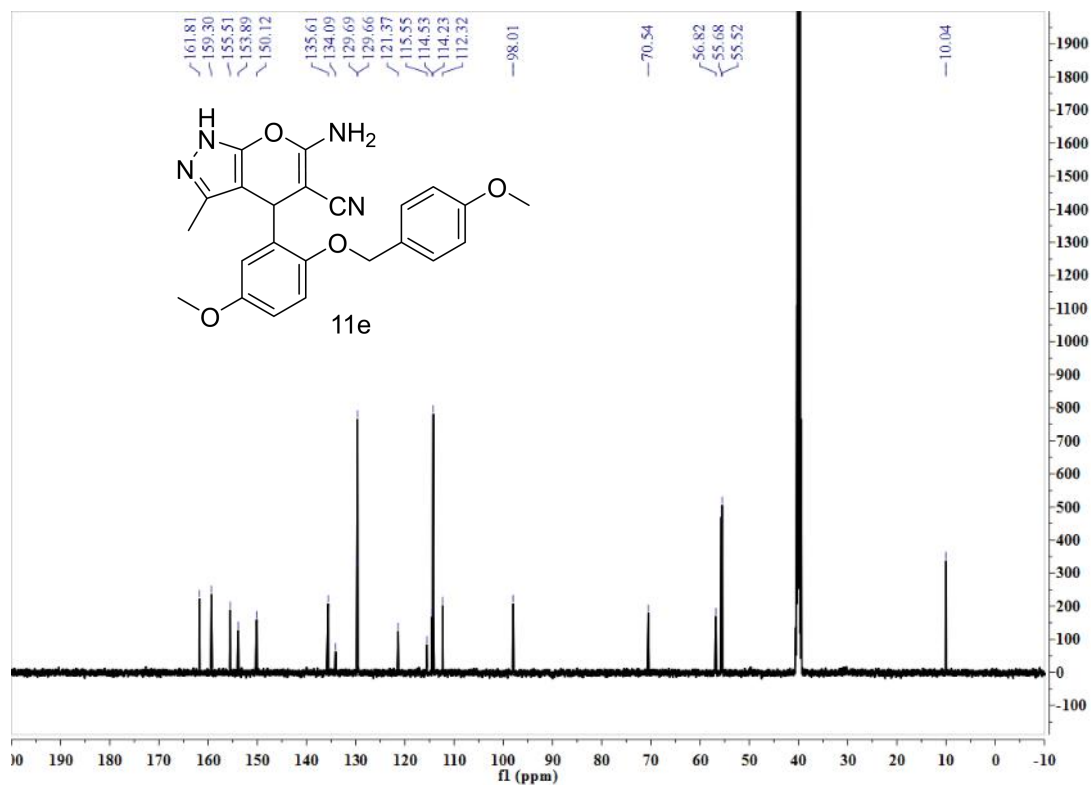

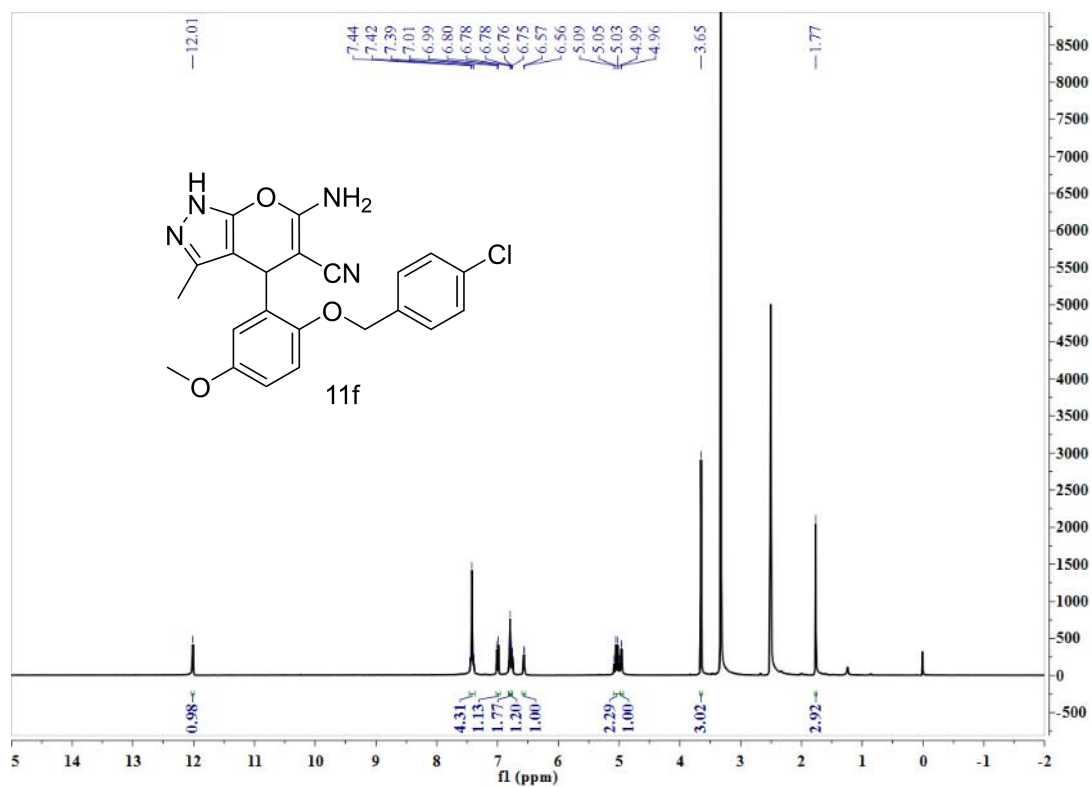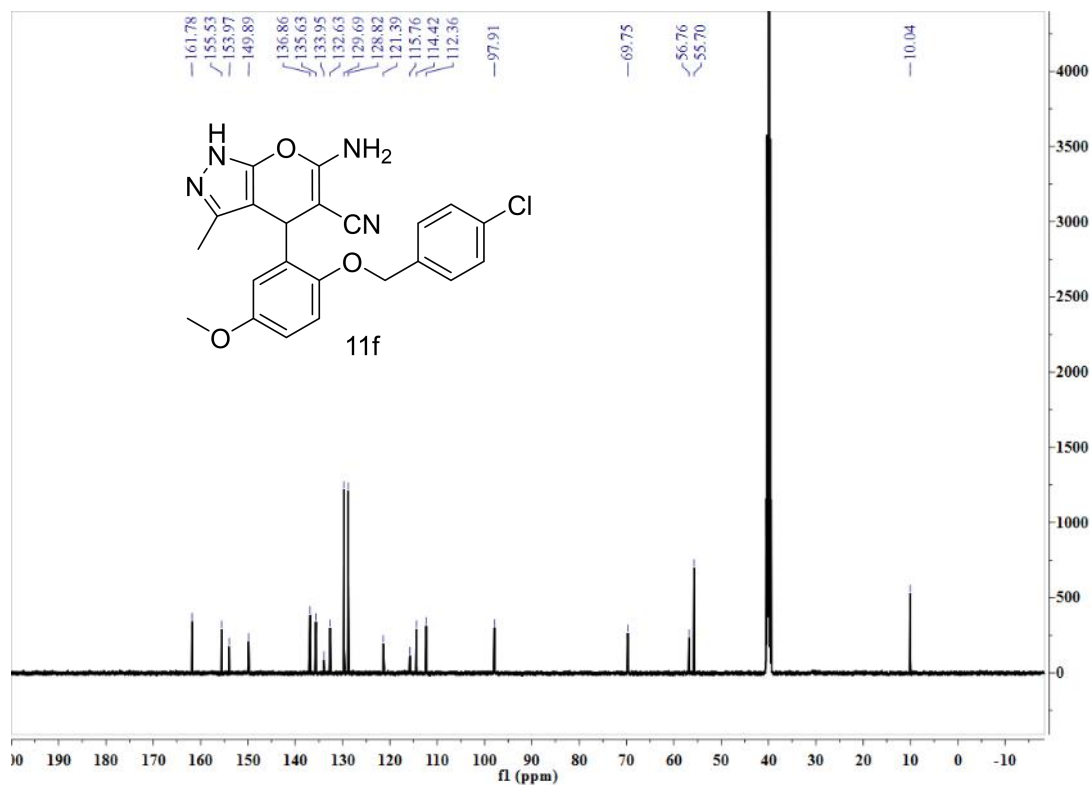

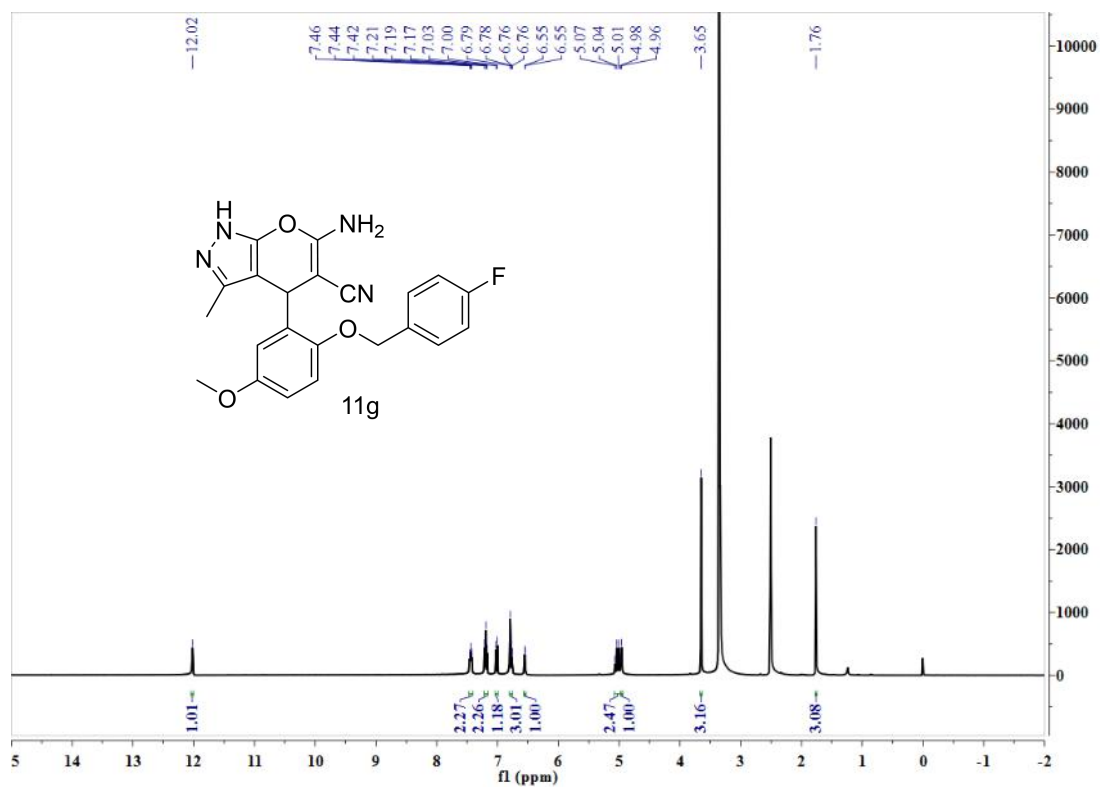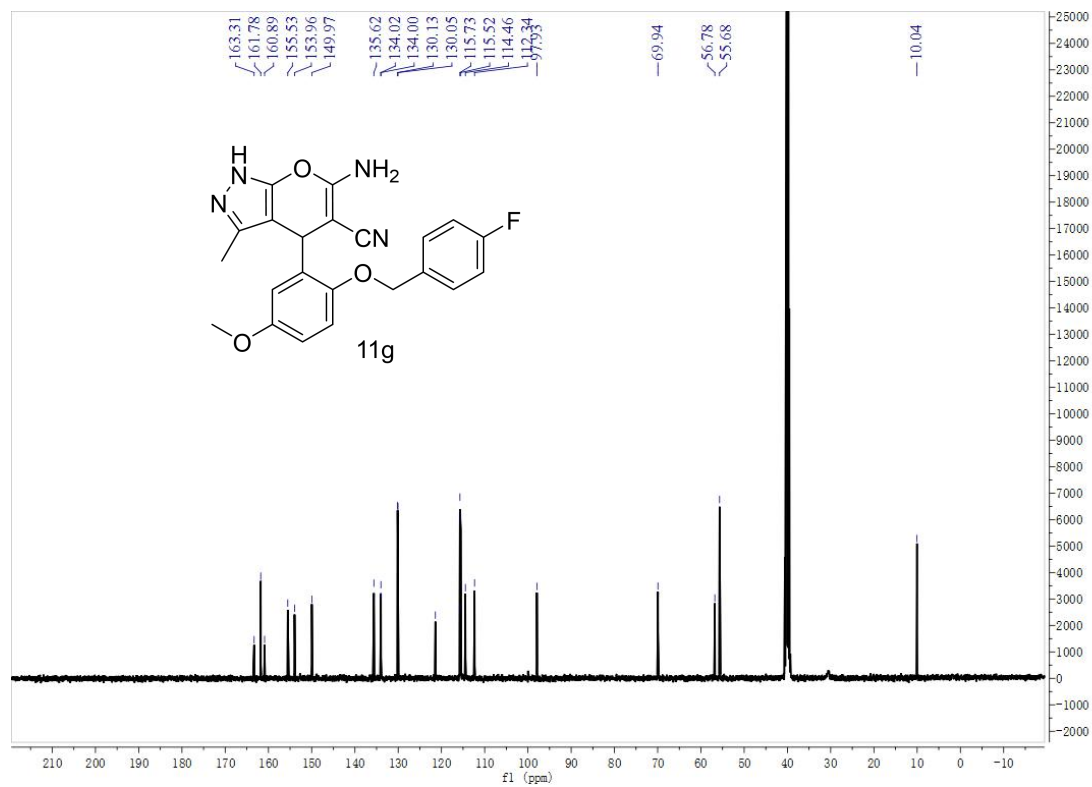

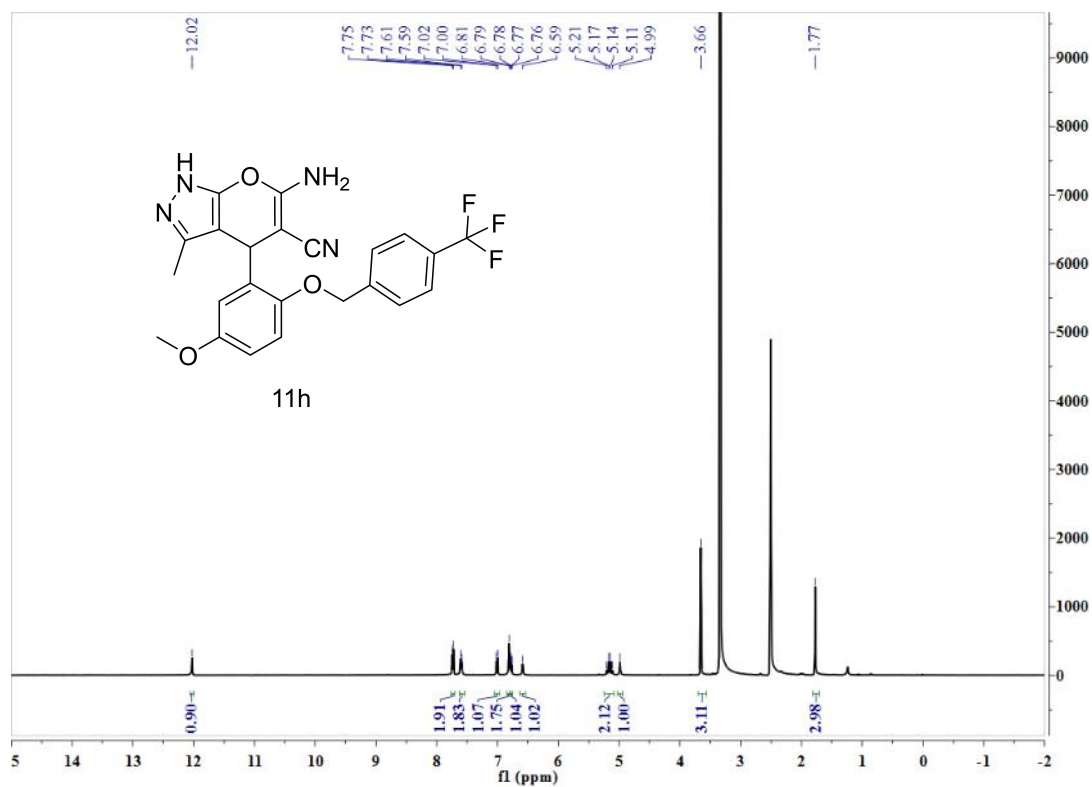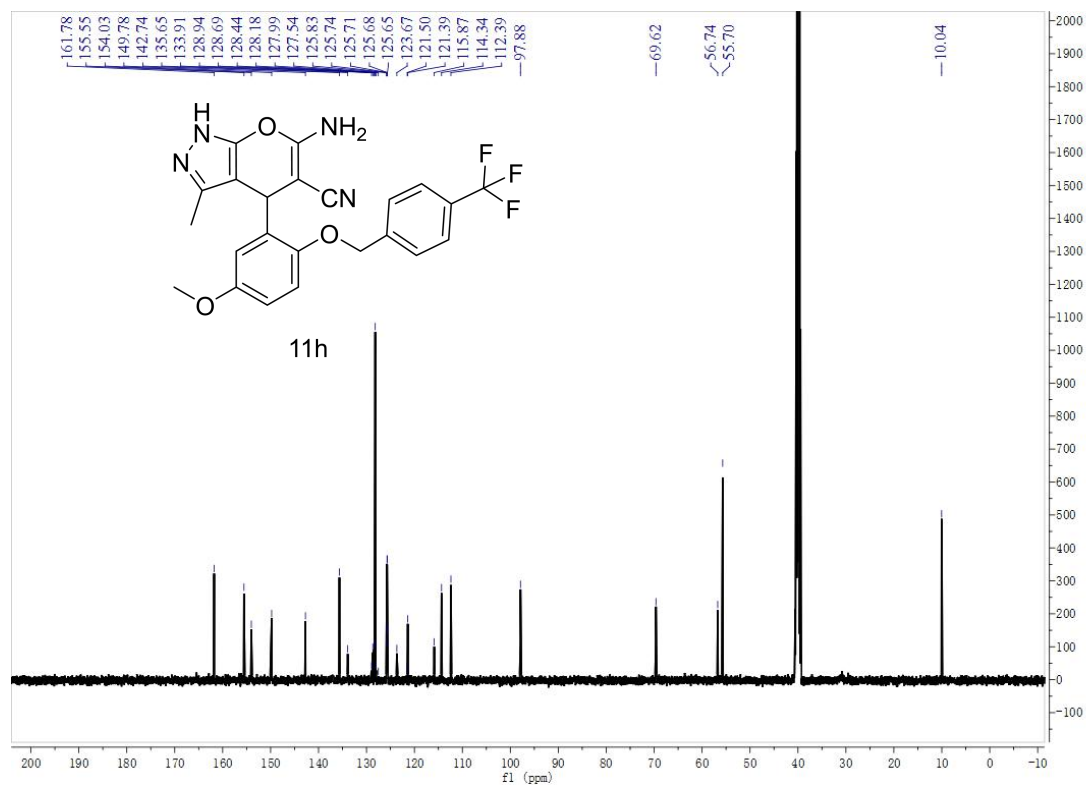



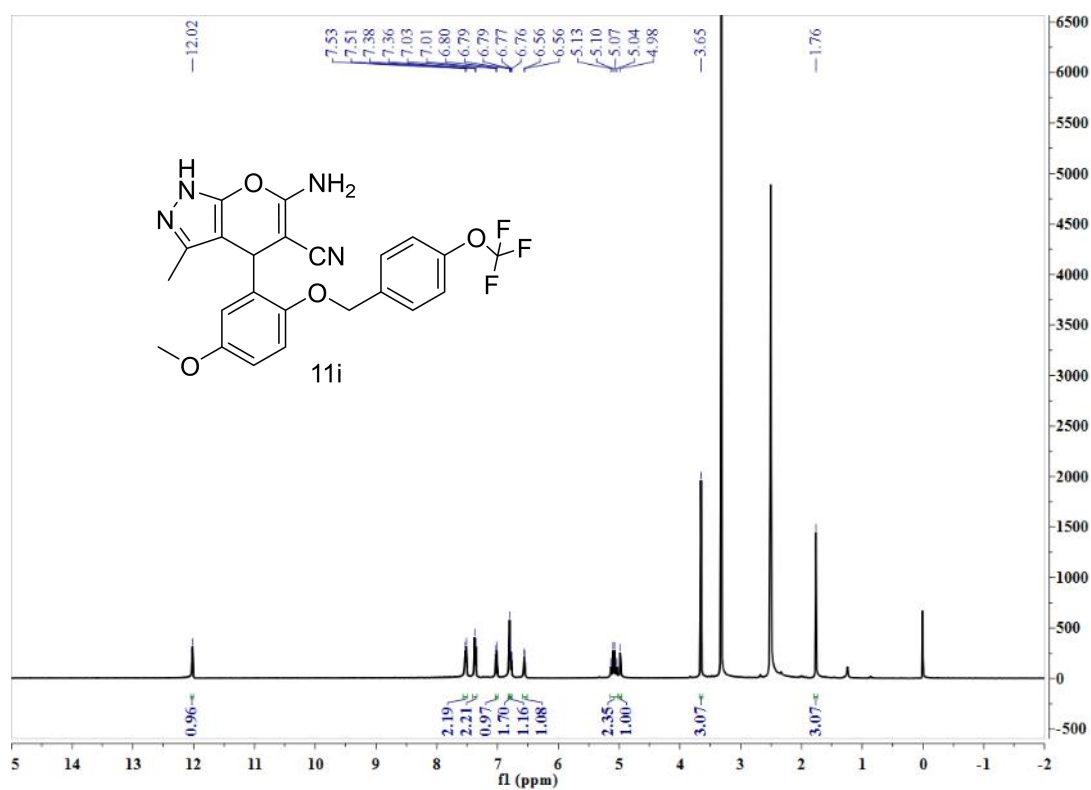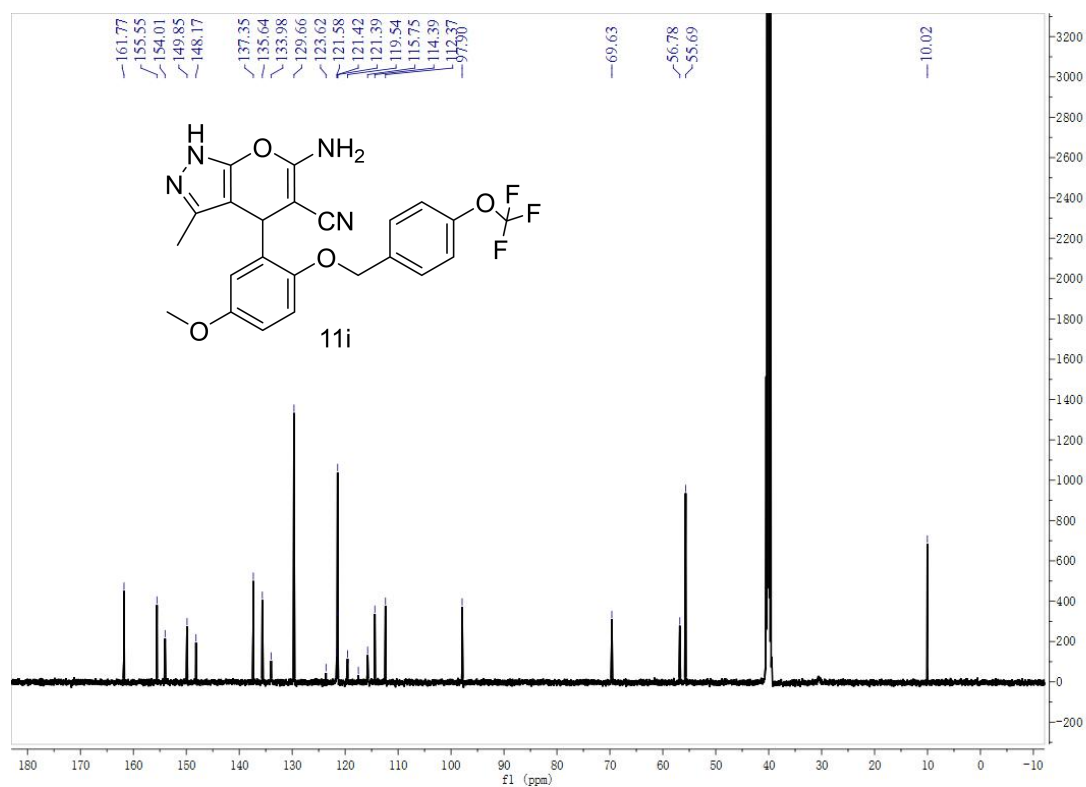

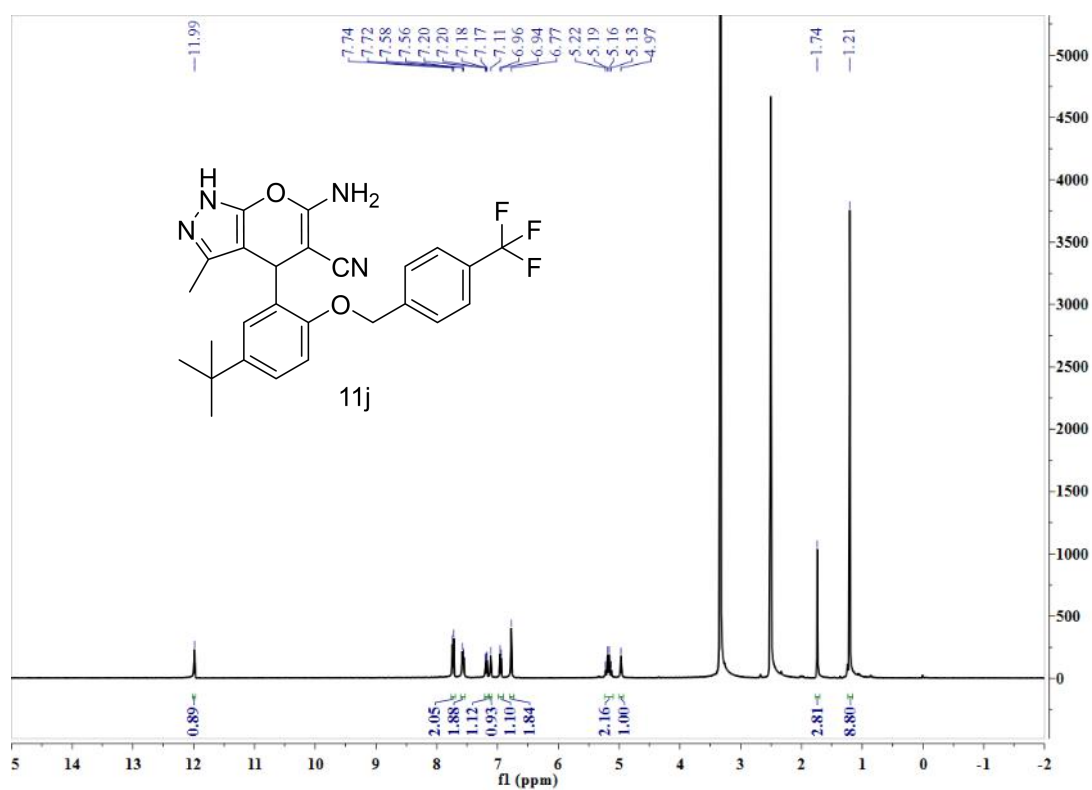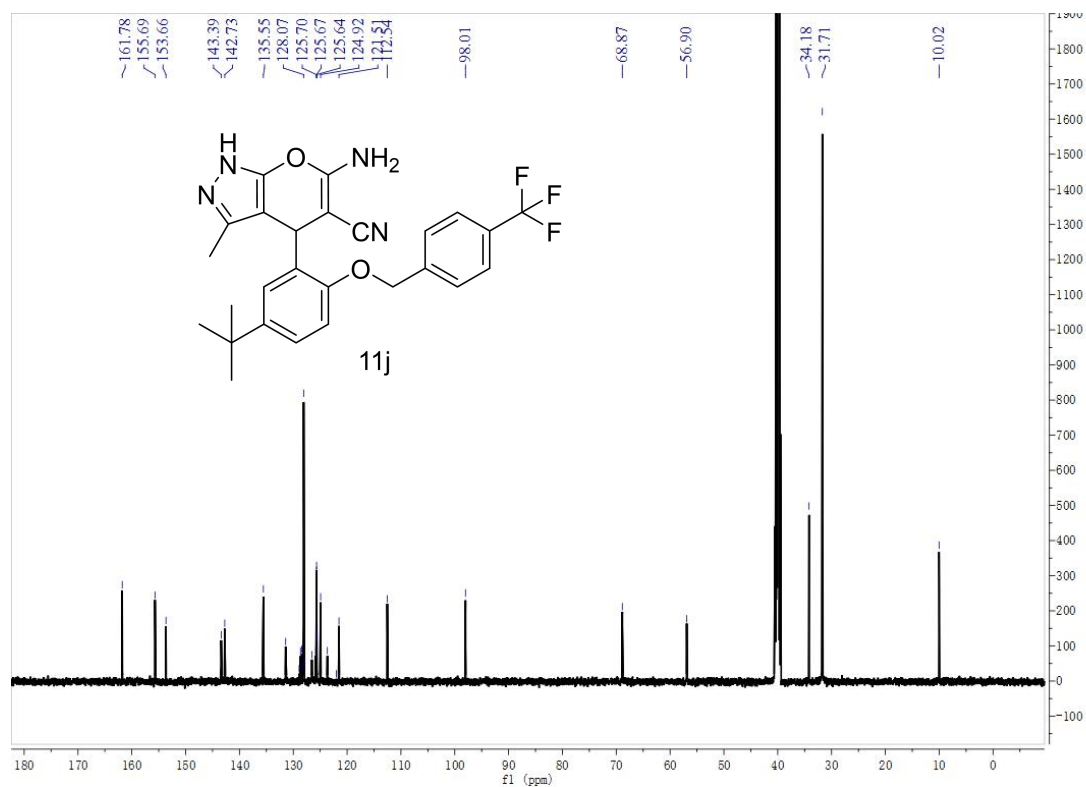

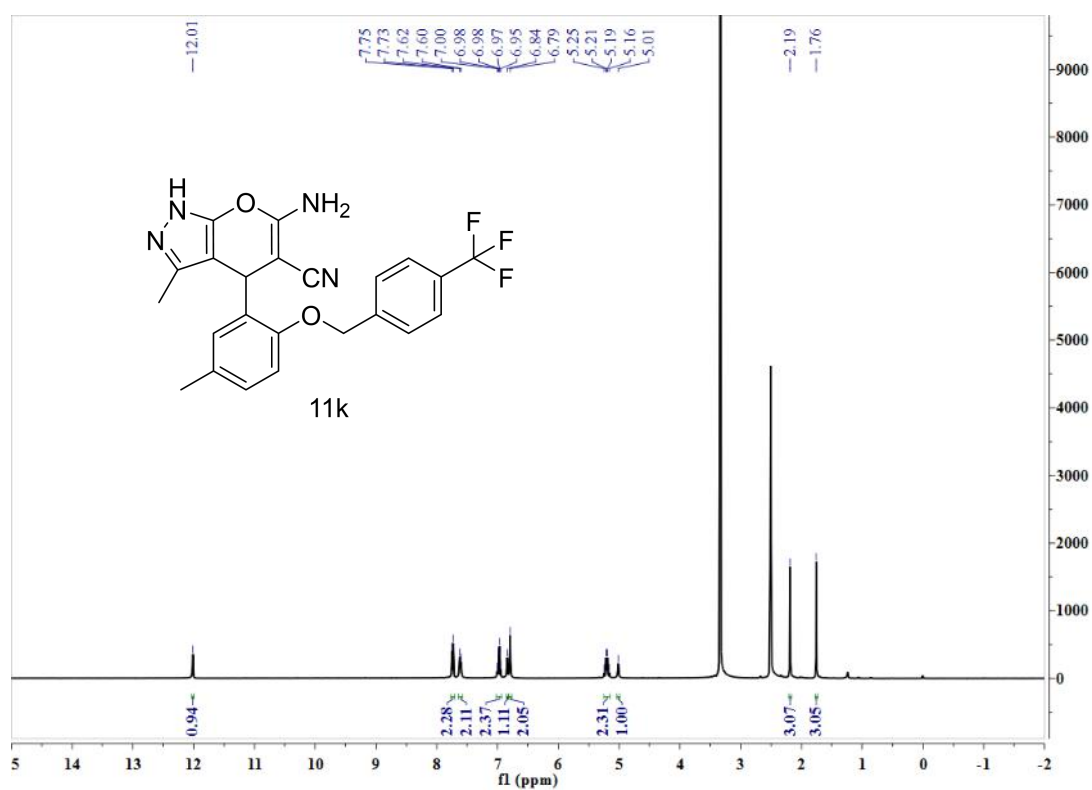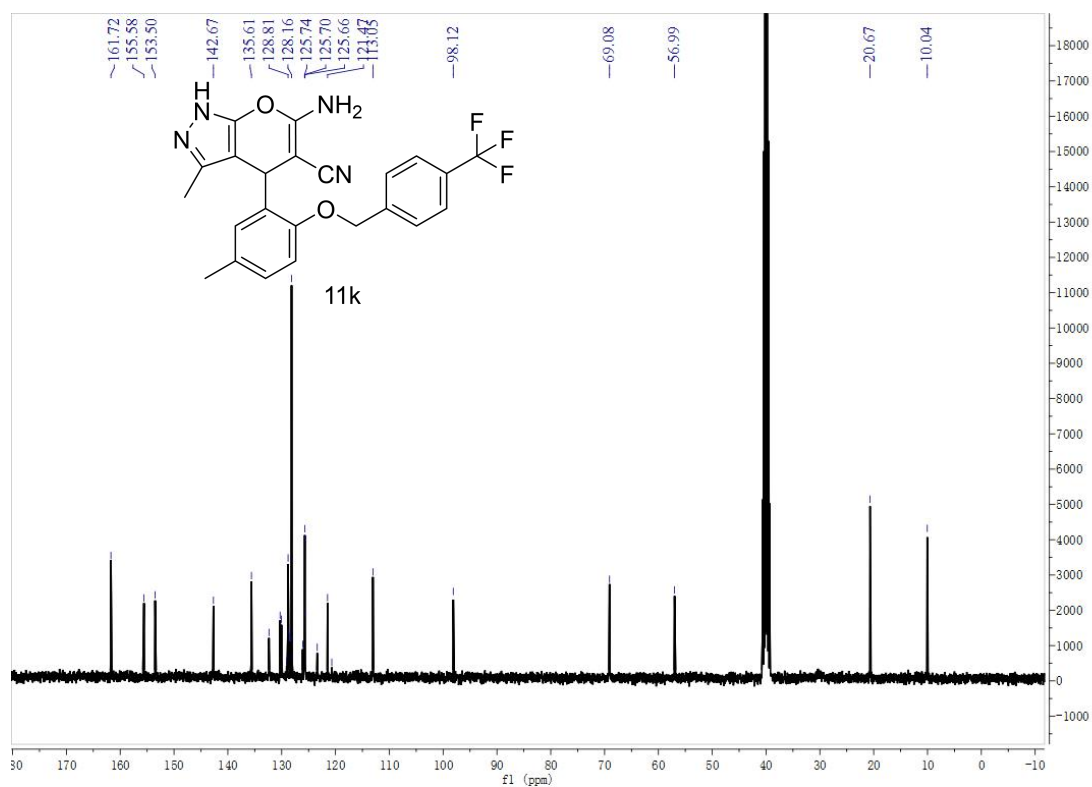

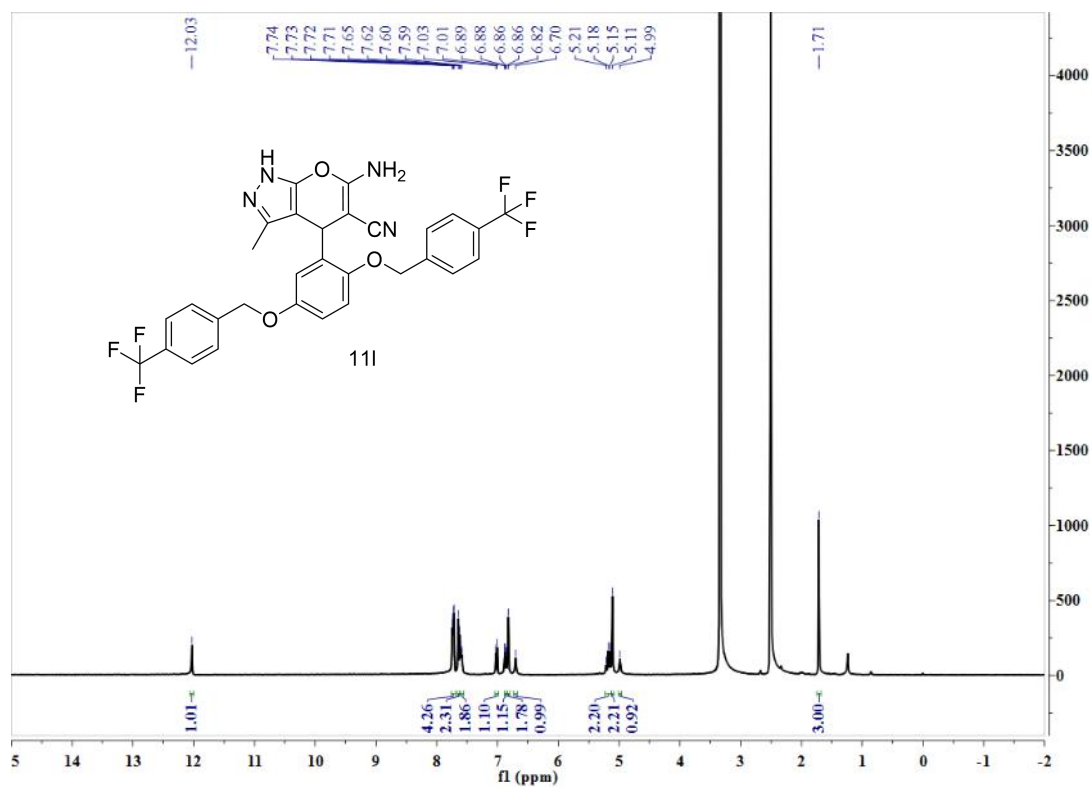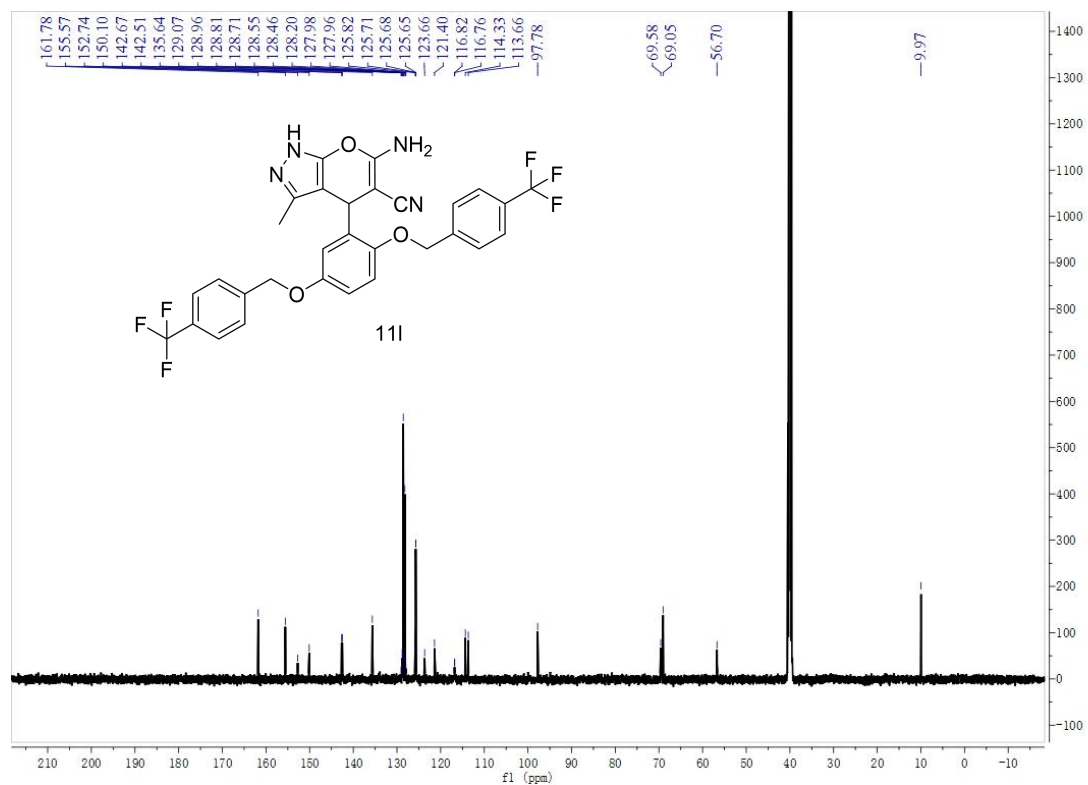

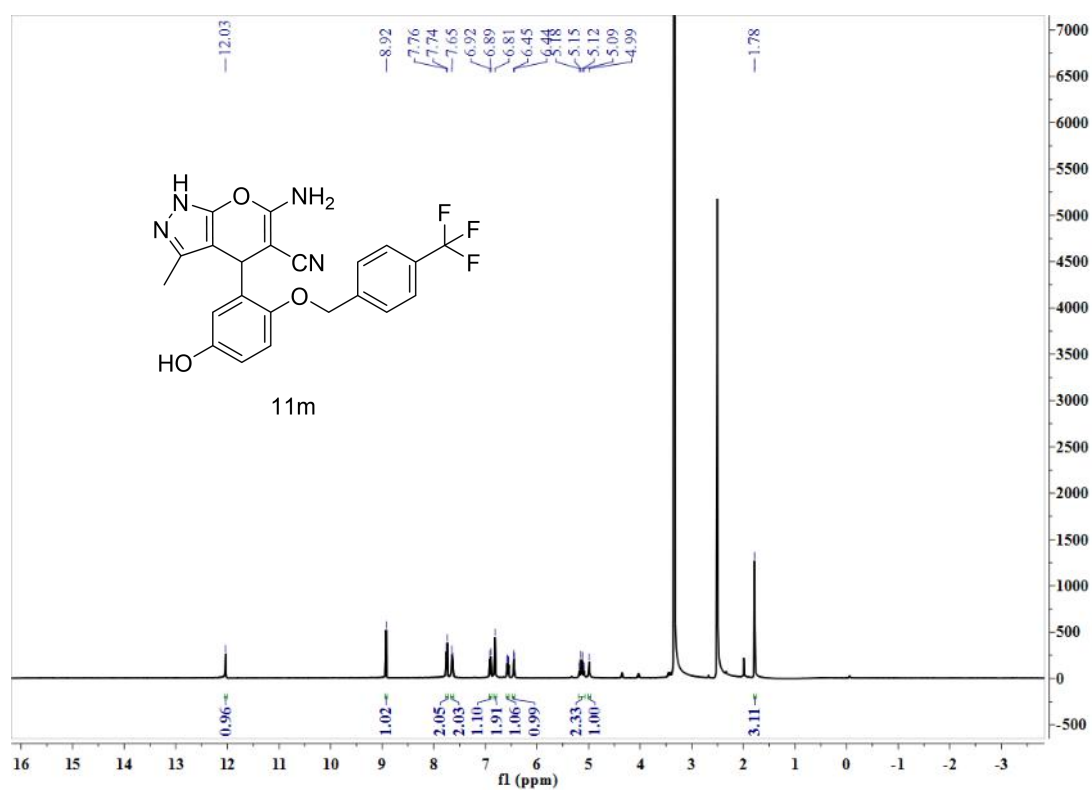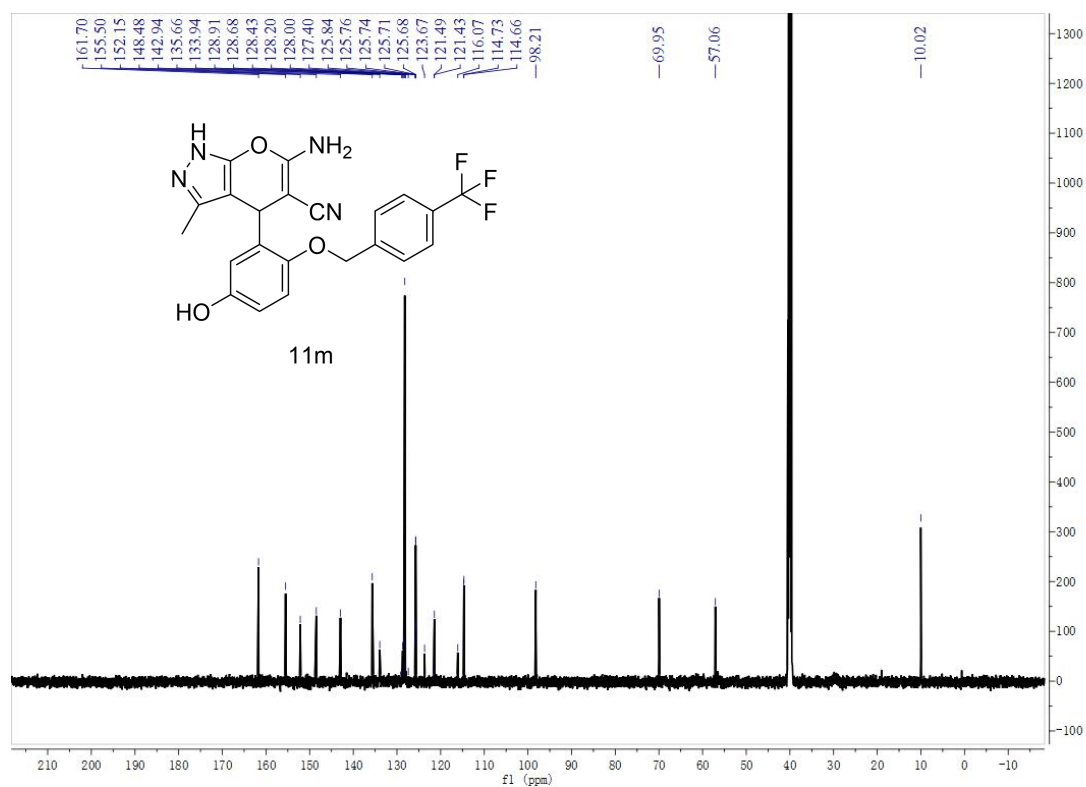

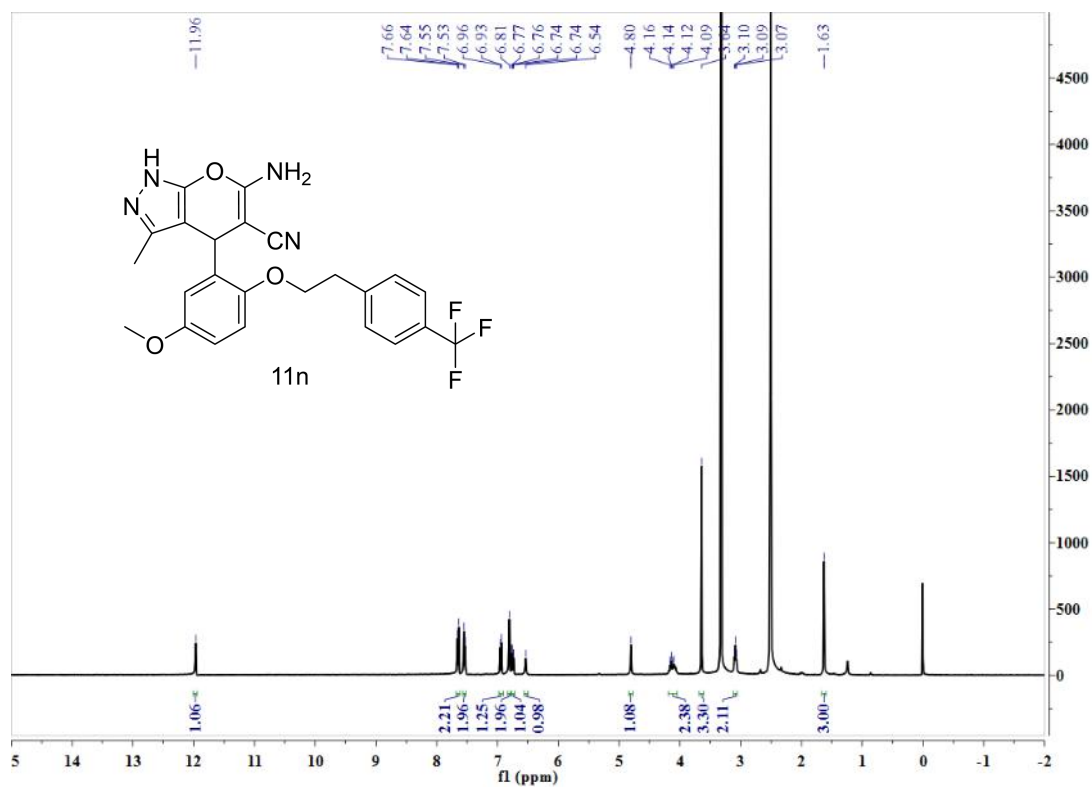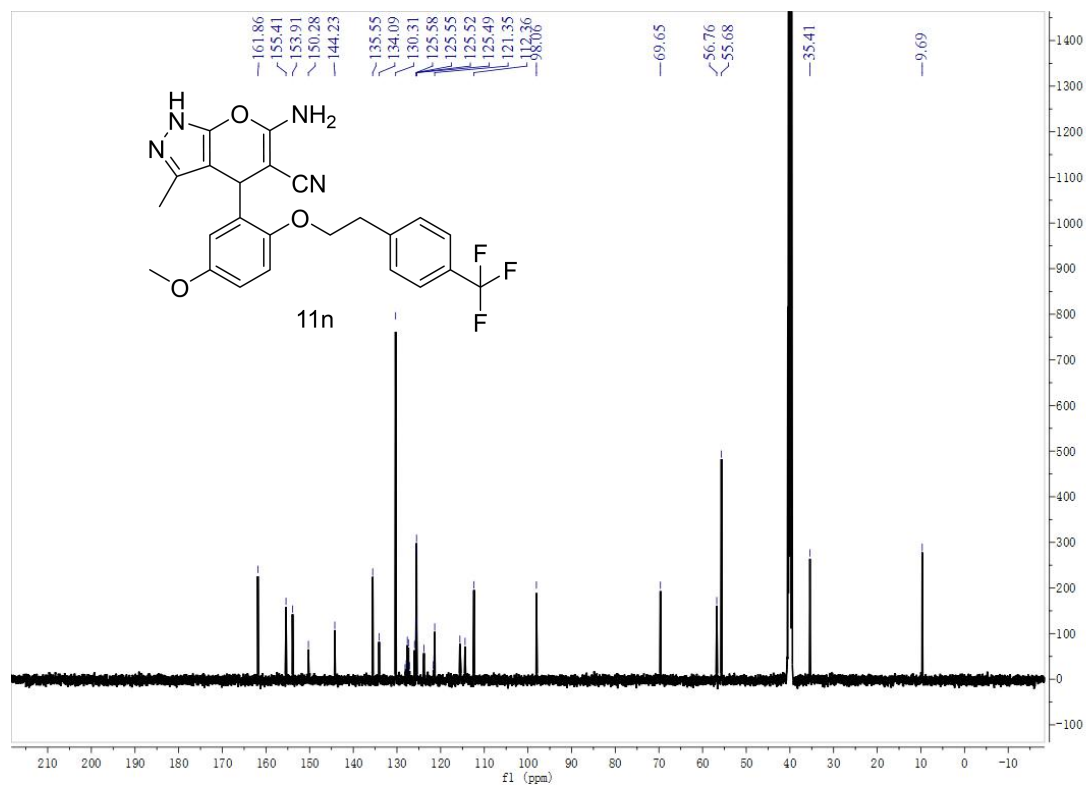

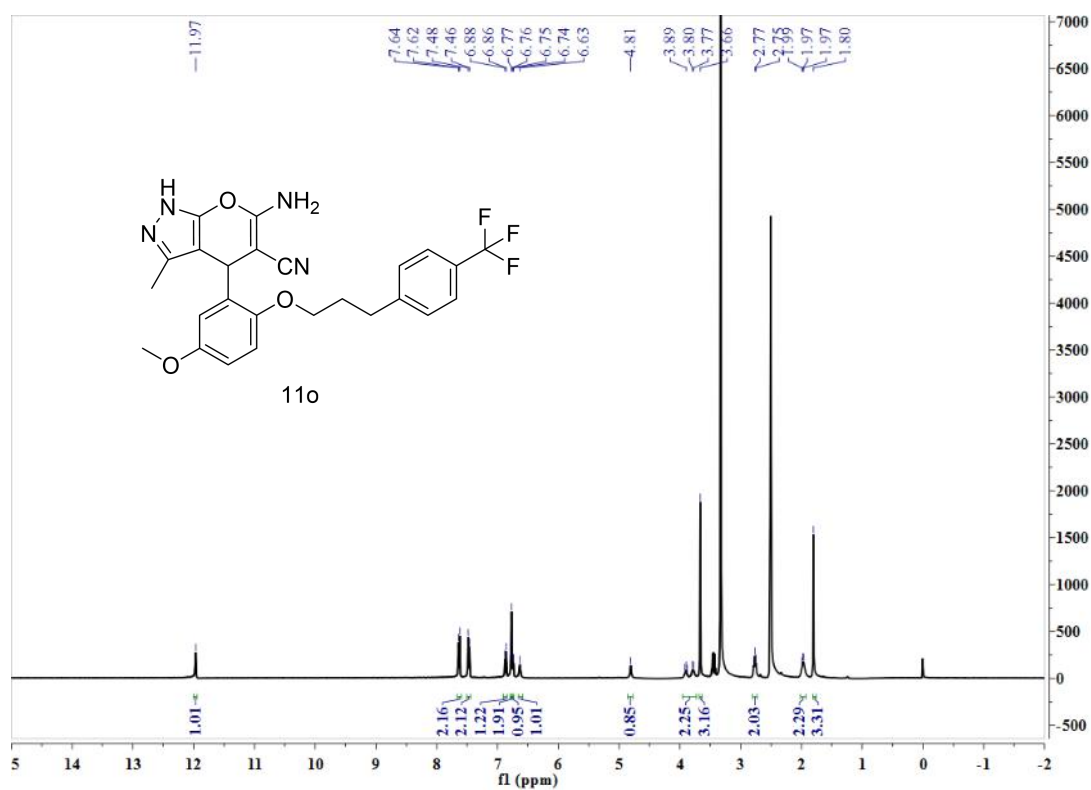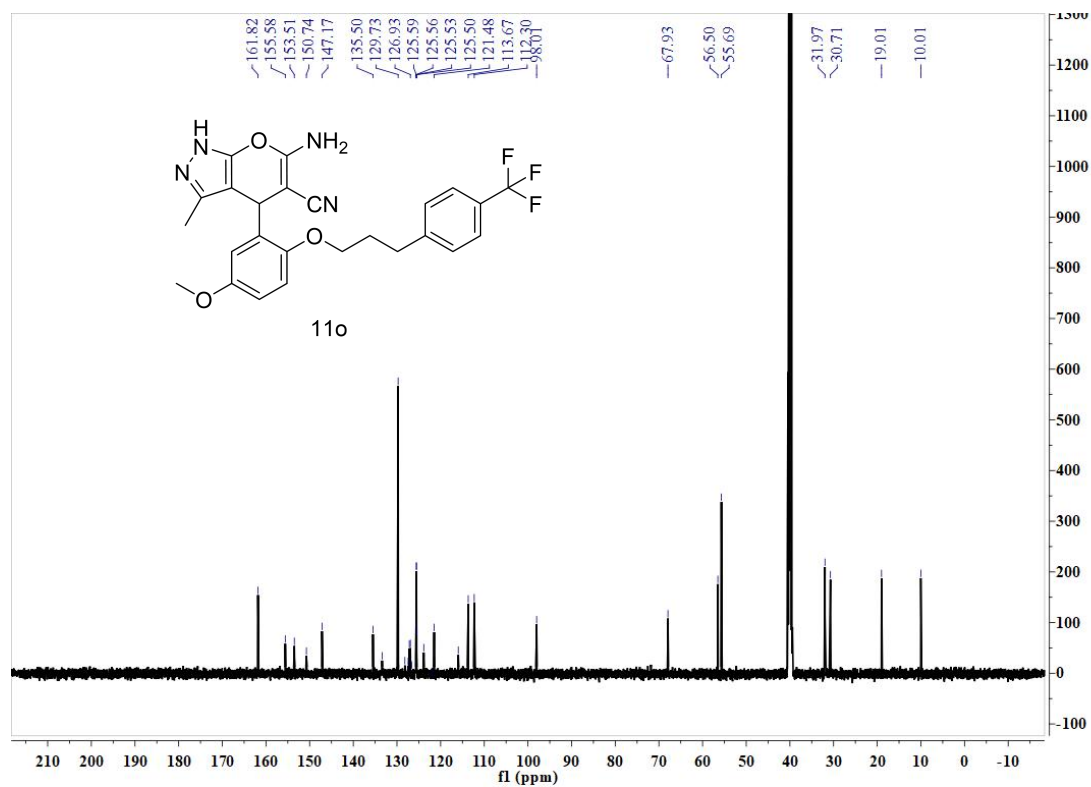

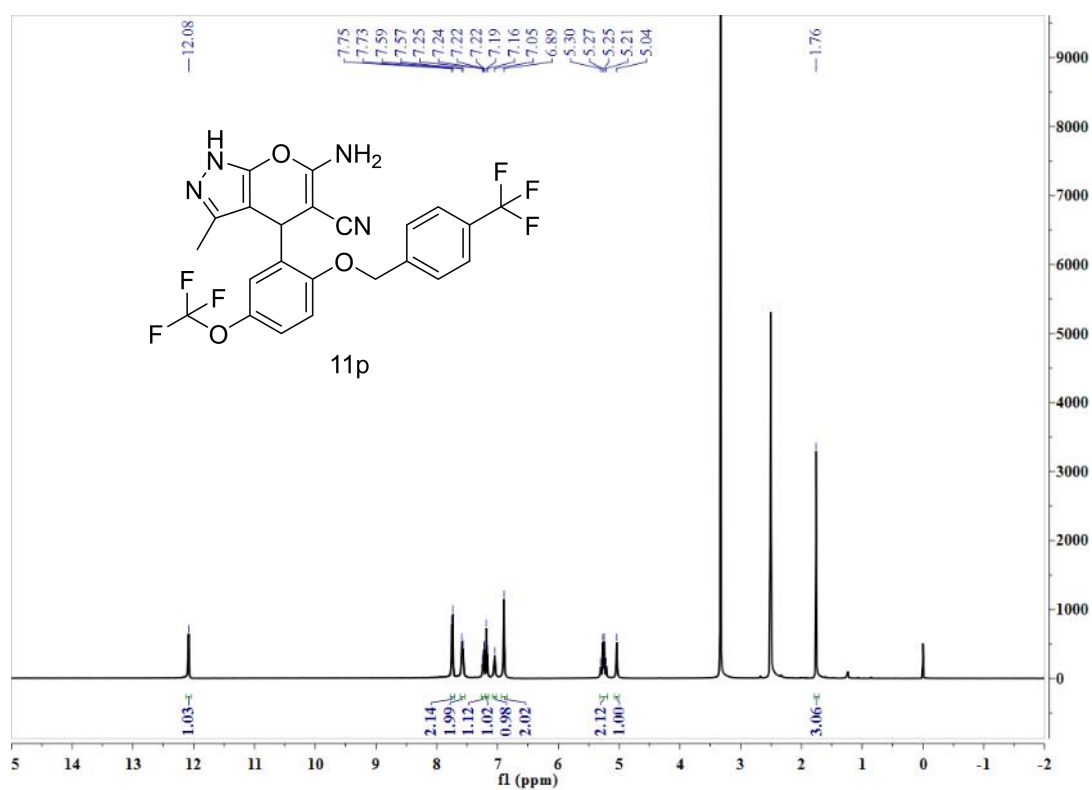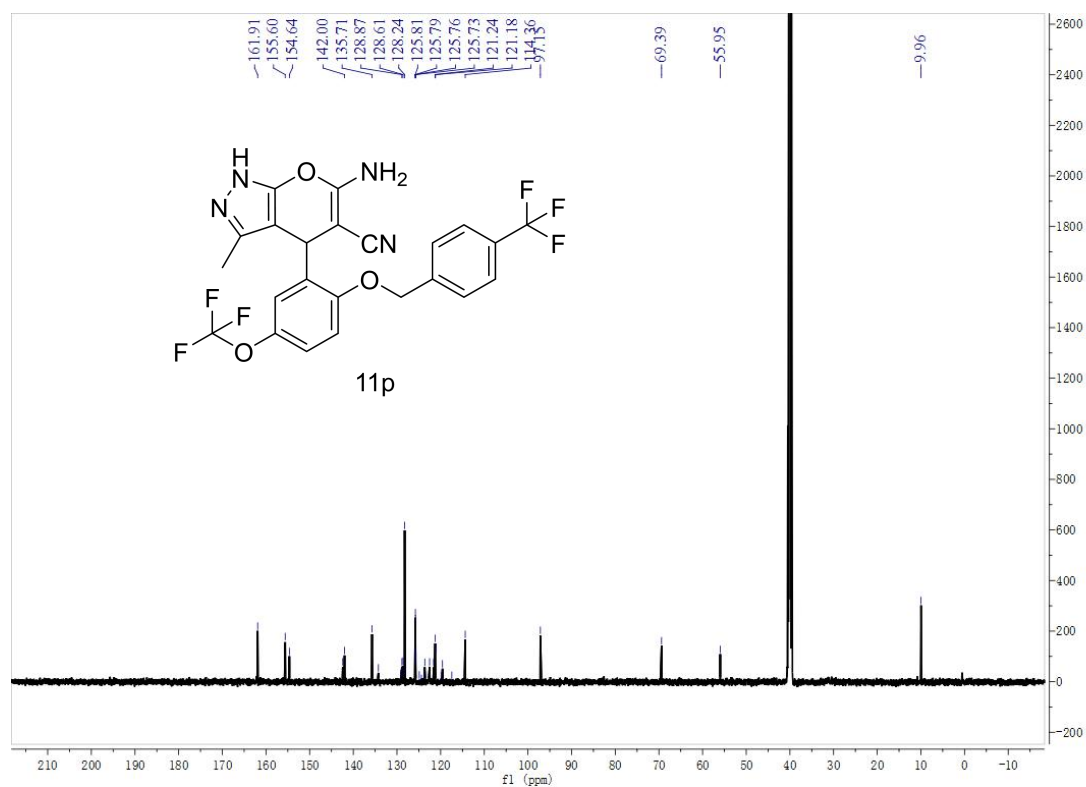



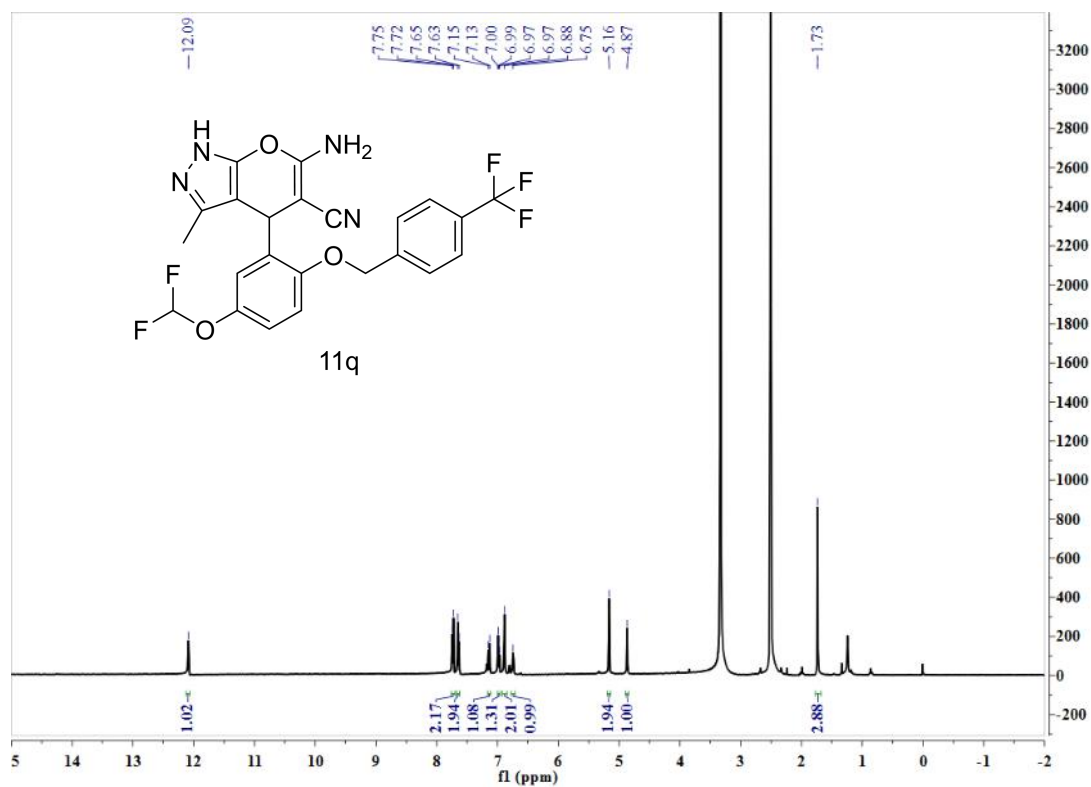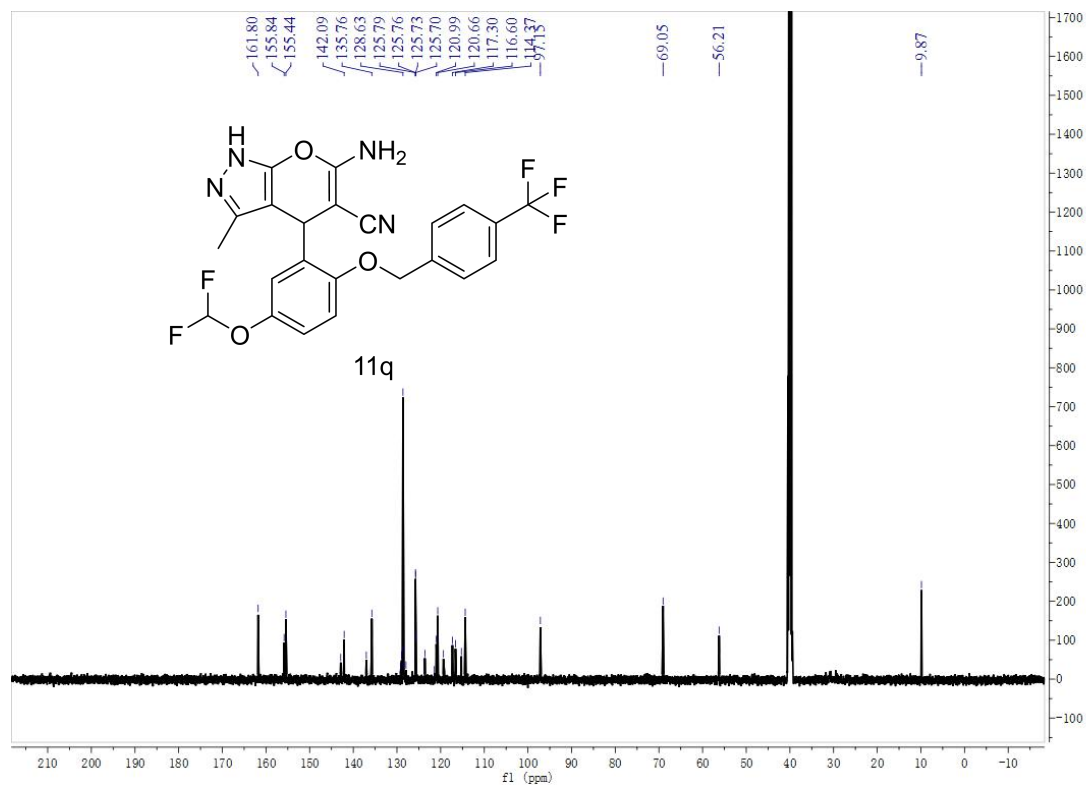

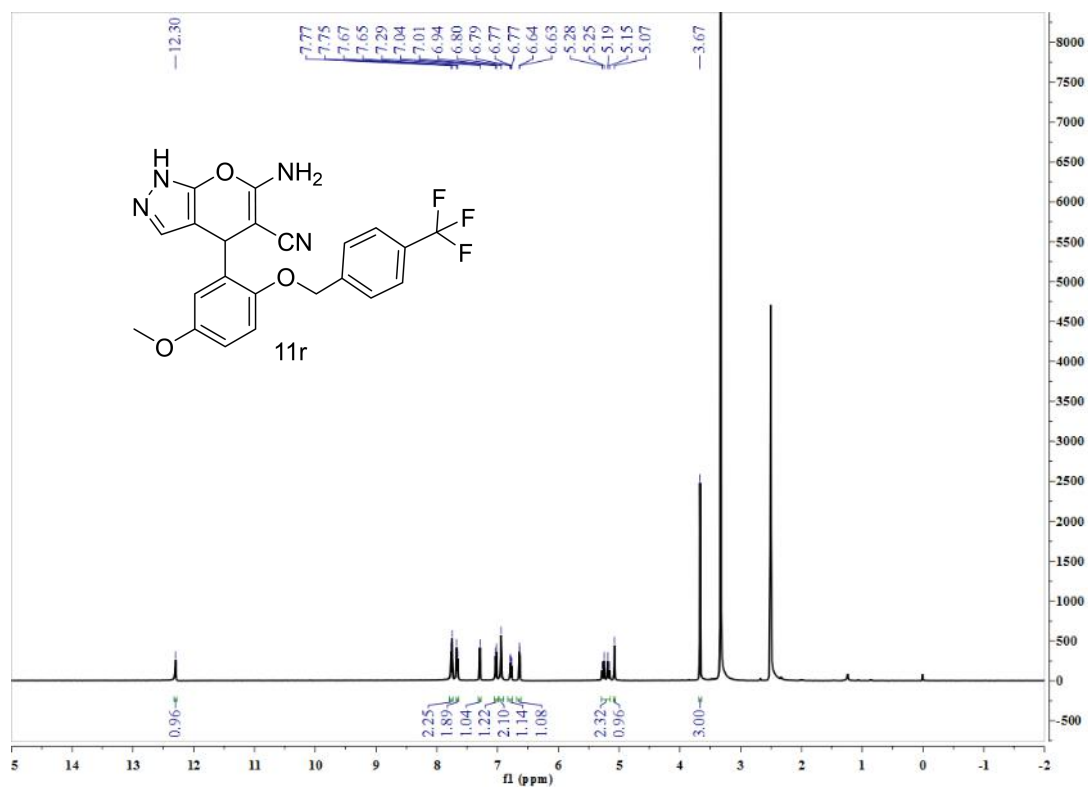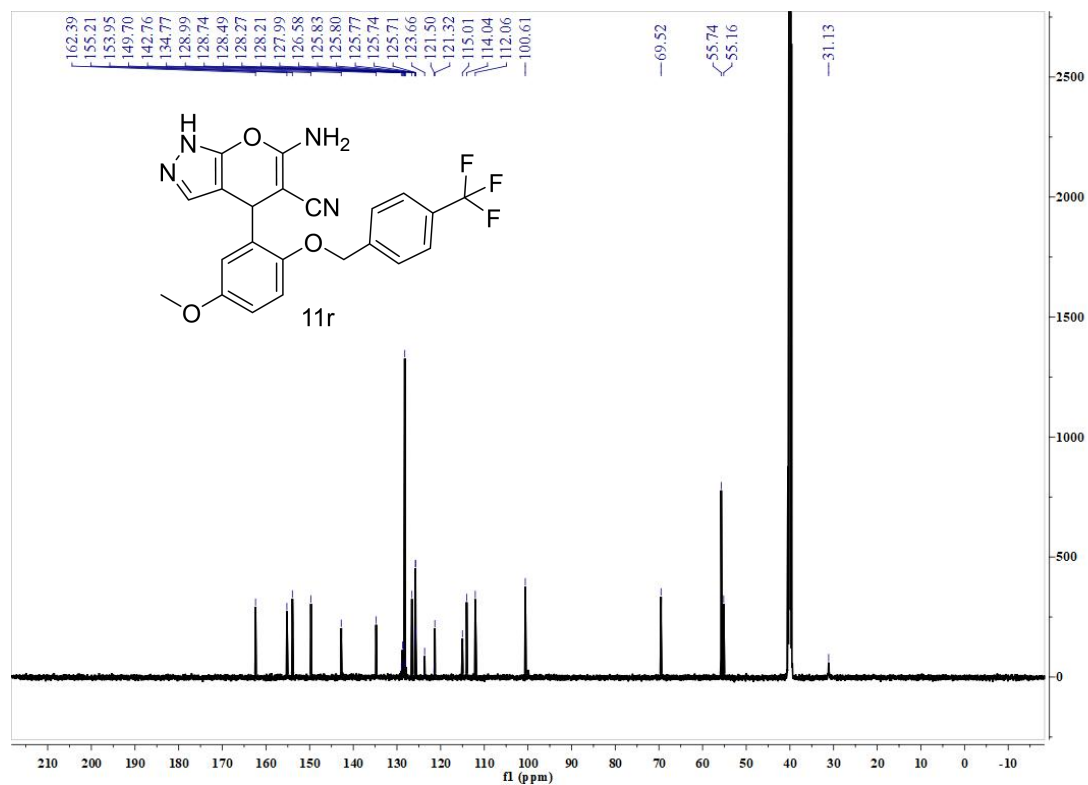

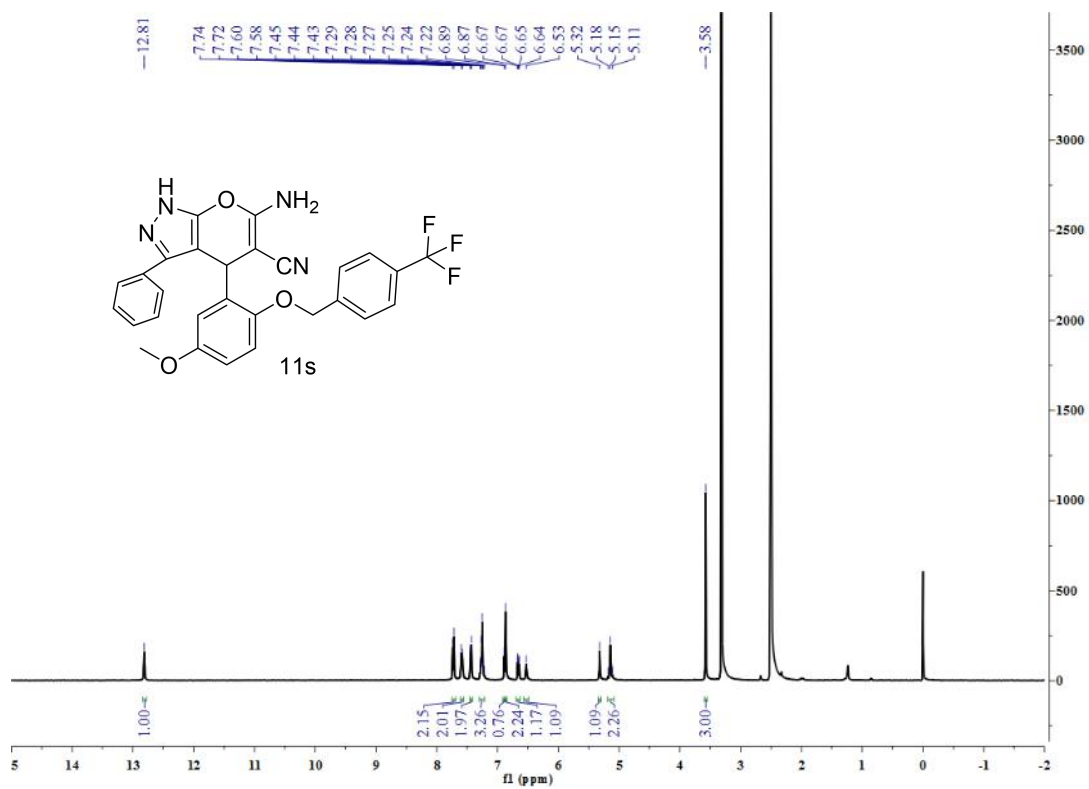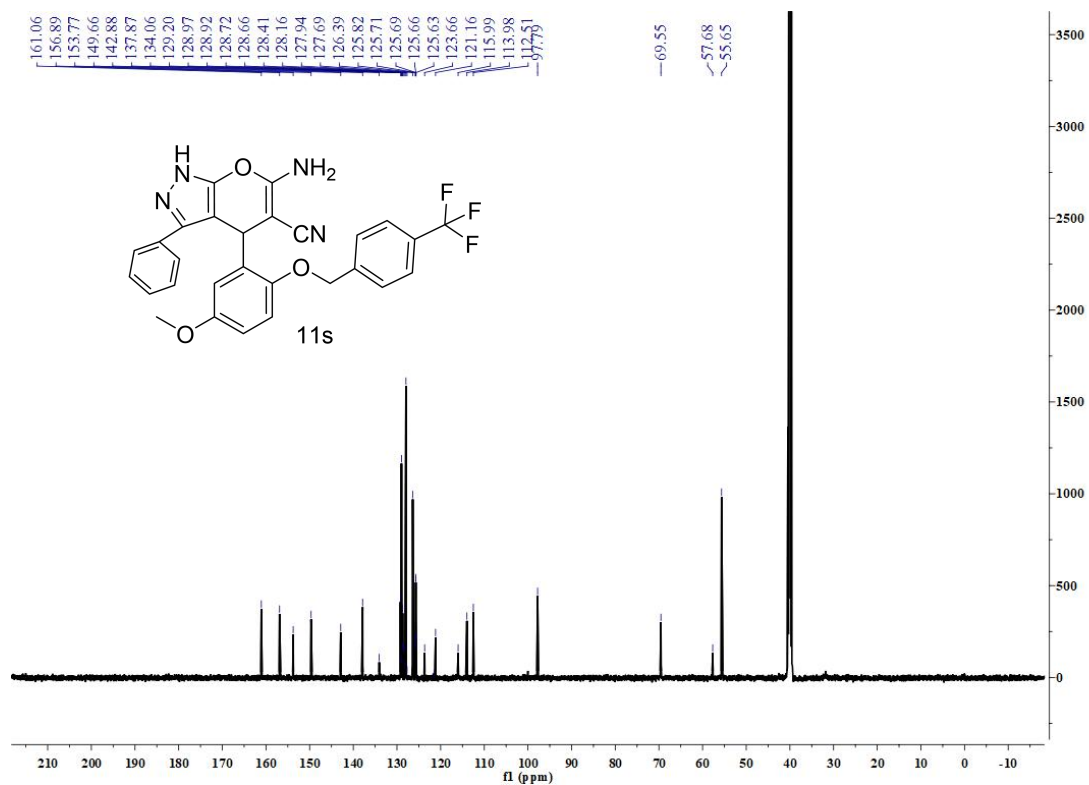

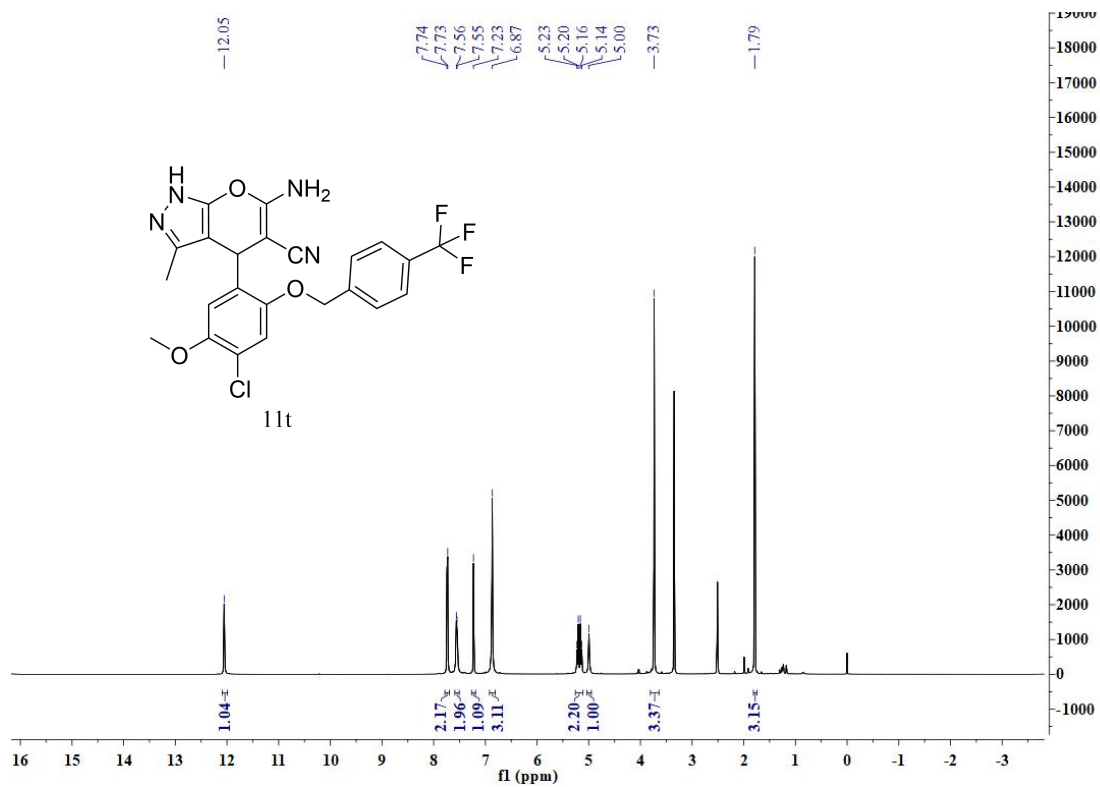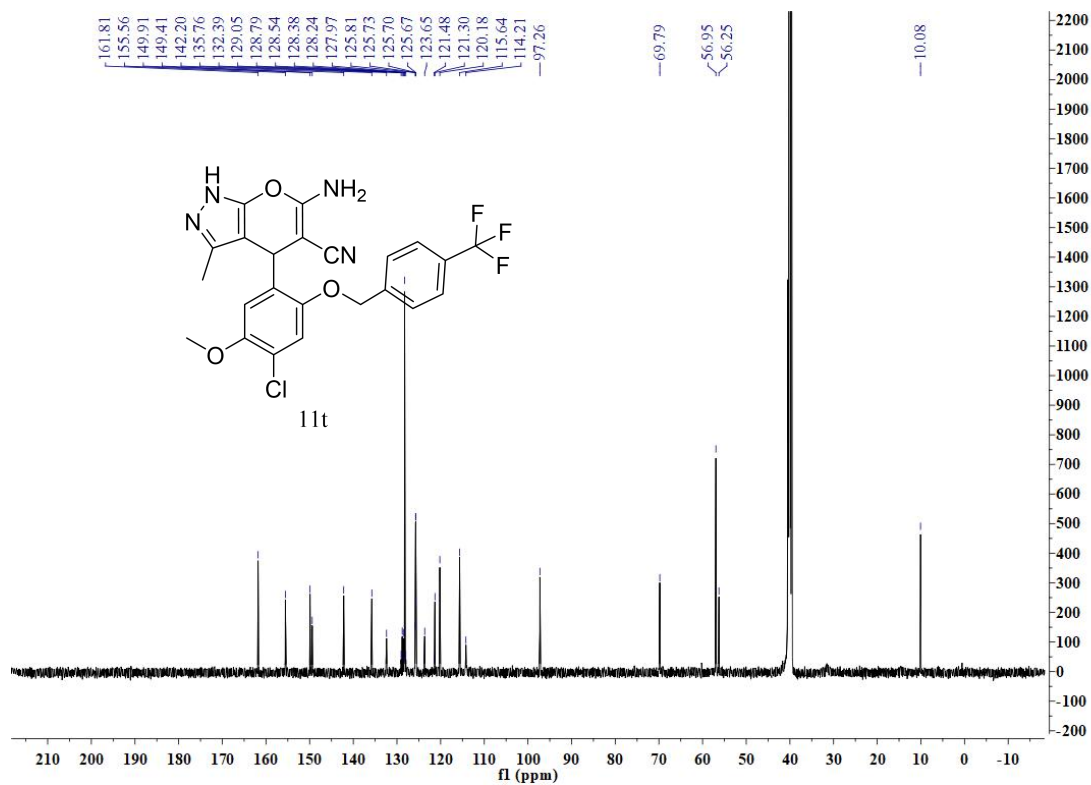

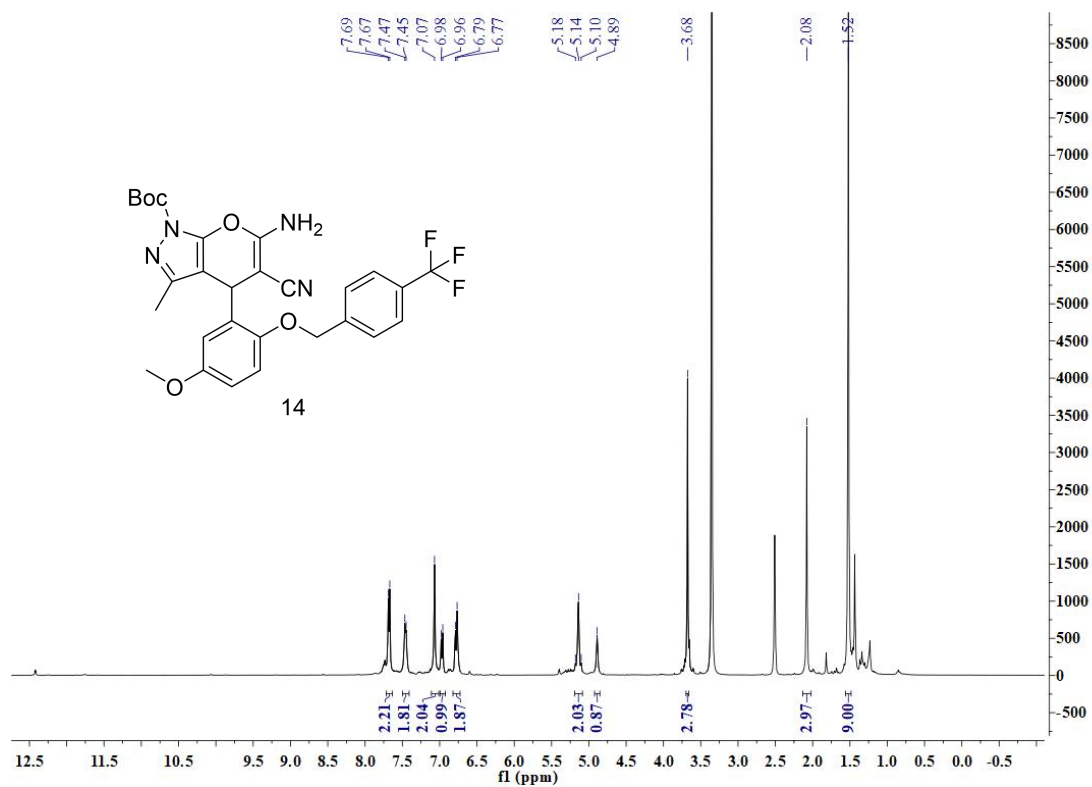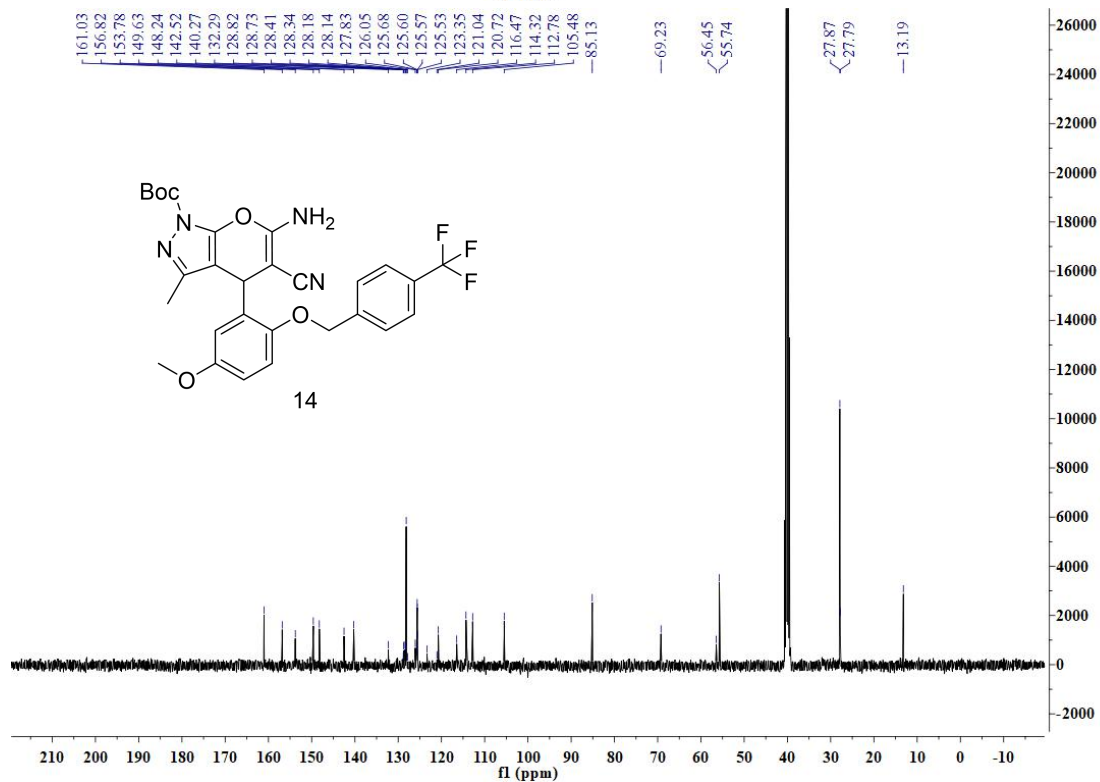

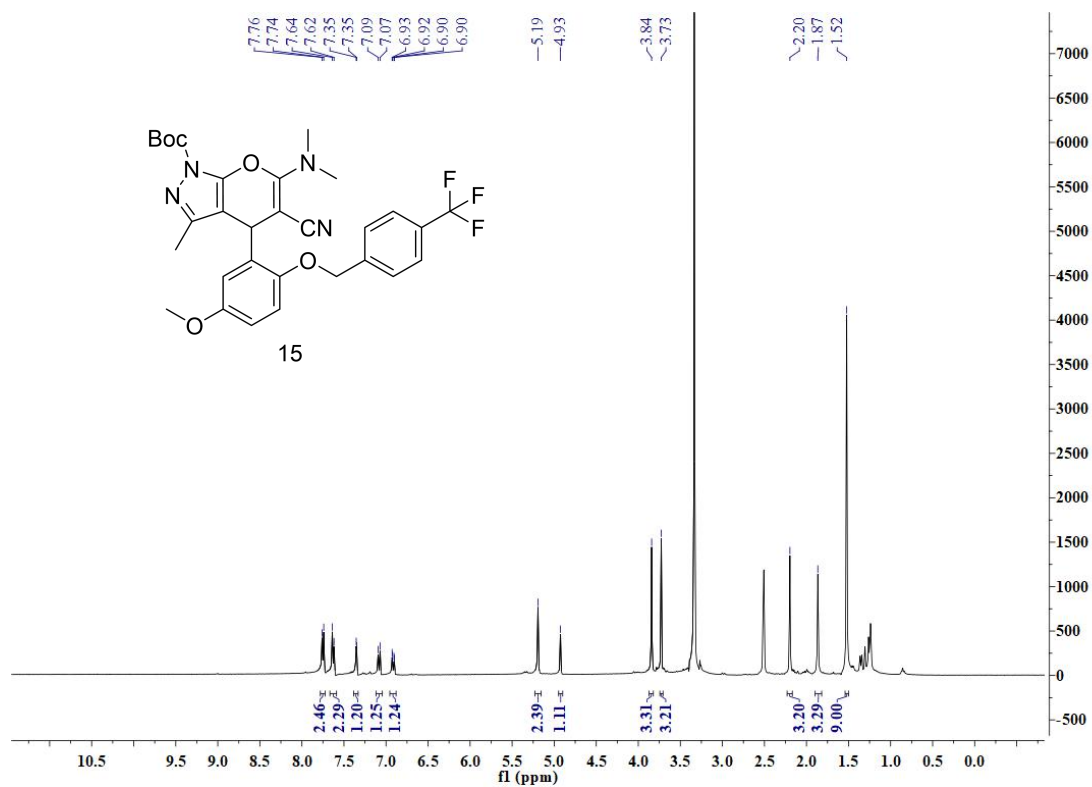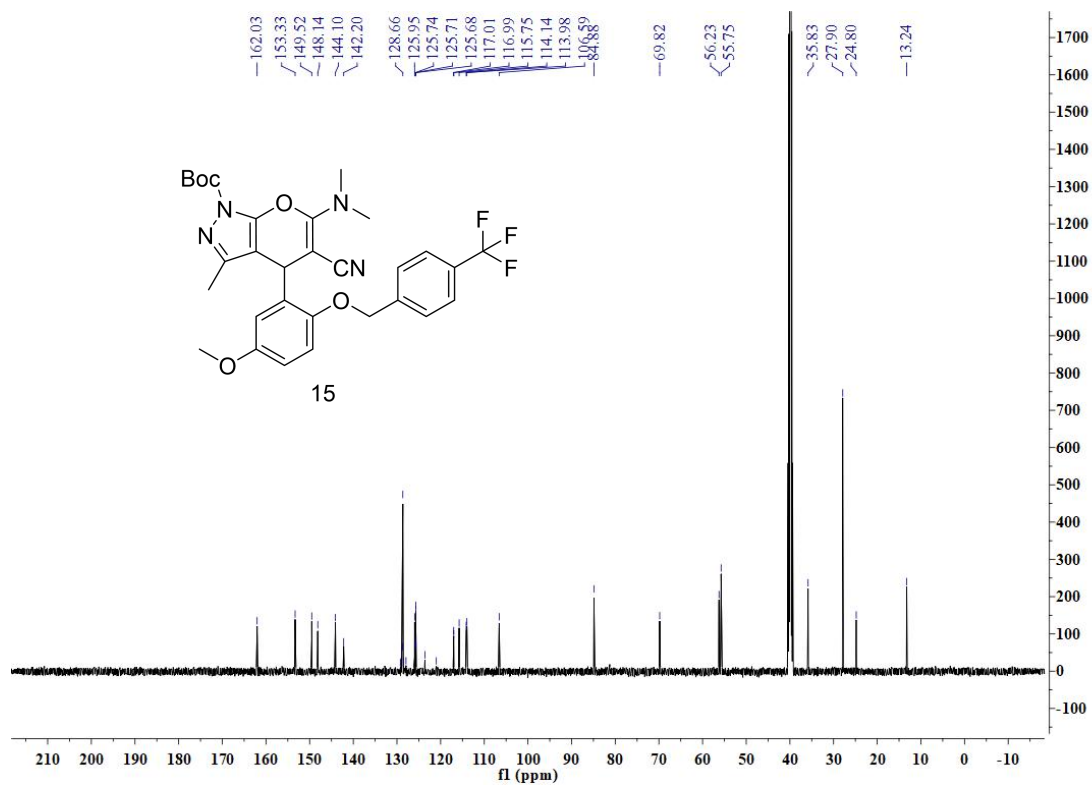

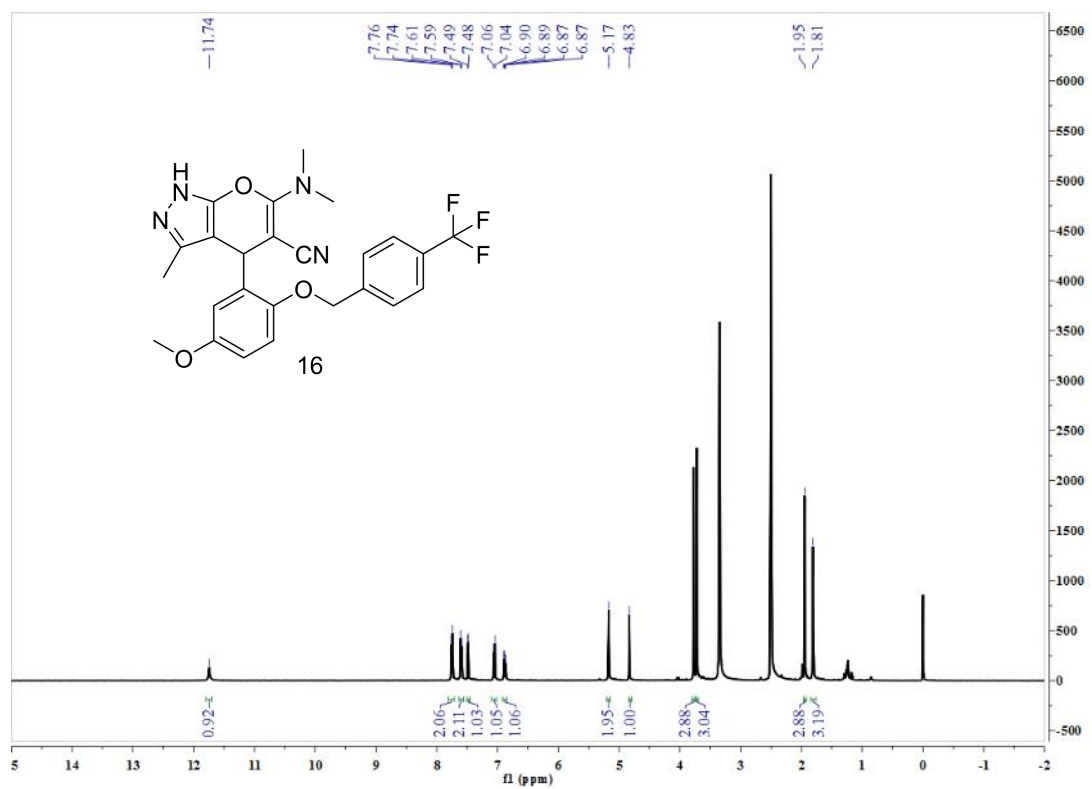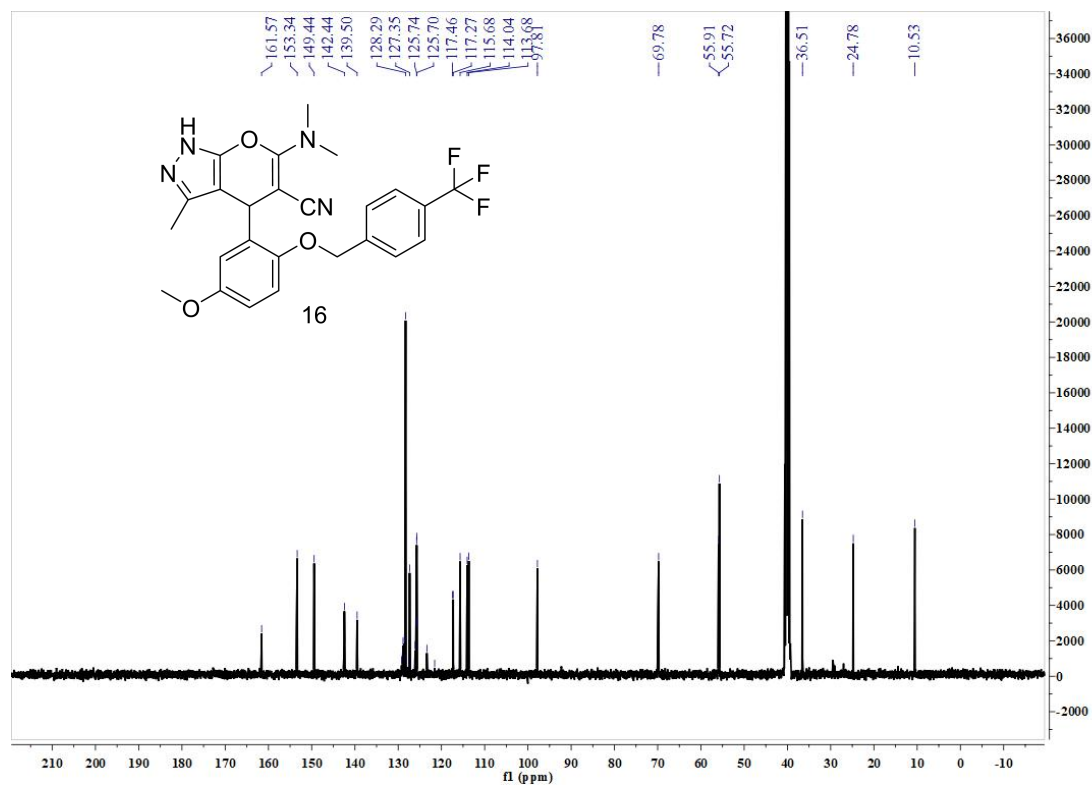

## 2. HRMS spectra of target compounds

### HRMS spectrum of 4a

| Elmt | Val. | Min | Max | Elmt | Val. | Min | Max | Elmt | Val. | Min | Max | Use Adduct |
|------|------|-----|-----|------|------|-----|-----|------|------|-----|-----|------------|
| H    | 1    | 0   | 21  | Al   | 3    | 0   | 0   | Zn   | 2    | 0   | 0   | K          |
| 2H   | 1    | 0   | 0   | Si   | 4    | 0   | 0   | Se   | 2    | 0   | 0   | H          |
| B    | 3    | 0   | 0   | P    | 3    | 0   | 0   | Br   | 1    | 0   | 0   | Na         |
| C    | 4    | 0   | 28  | S    | 2    | 0   | 0   | Ru   | 2    | 0   | 0   | NH4        |
| N    | 3    | 0   | 4   | Cl   | 1    | 0   | 1   | Sb   | 3    | 0   | 0   |            |
| O    | 2    | 0   | 4   | Fe   | 2    | 0   | 0   | I    | 3    | 0   | 0   |            |
| F    | 1    | 0   | 3   | Ni   | 2    | 0   | 0   | Ir   | 3    | 0   | 0   |            |
| Na   | 1    | 0   | 0   | Cu   | 2    | 0   | 0   | Pt   | 2    | 0   | 0   |            |

Error Margin (ppm): 100  
 DBE Range: -100.0 - 100.0  
 Electron Ions: both  
 HC Ratio: 0.0 - 100.0  
 Apply N Rule: no  
 Use MSn Info: yes  
 Max Isotopes: all  
 Isotope RI (%): 1.00  
 Isotope Res: 10000  
 MSn Iso RI (%): 75.00  
 MSn Logic Mode: OR  
 Max Results: 100

Event#: 1 MS(E+) Ret. Time : 0.760 Scan#: 115

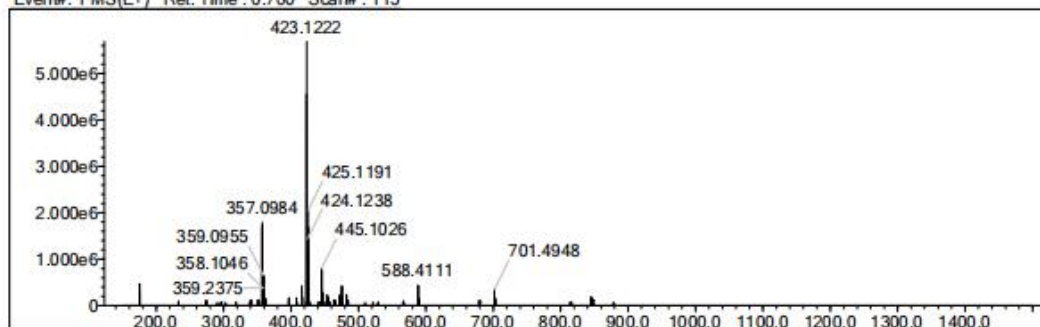

Measured region for 423.1222 m/z

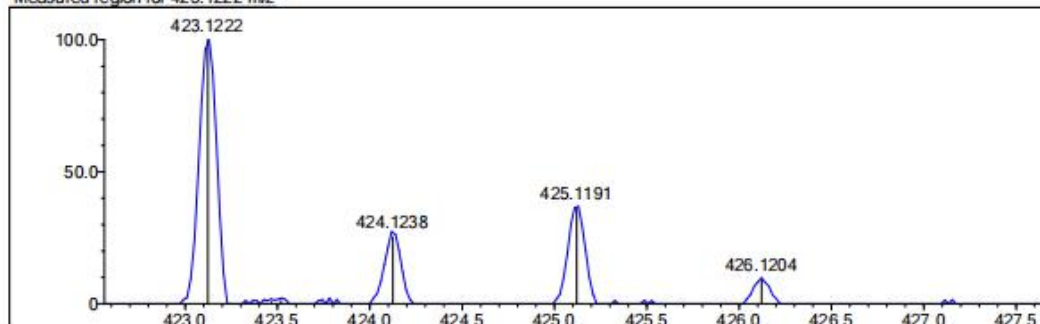

C22 H19 N4 O3 Cl [M+H]<sup>+</sup>: Predicted region for 423.1218 m/z

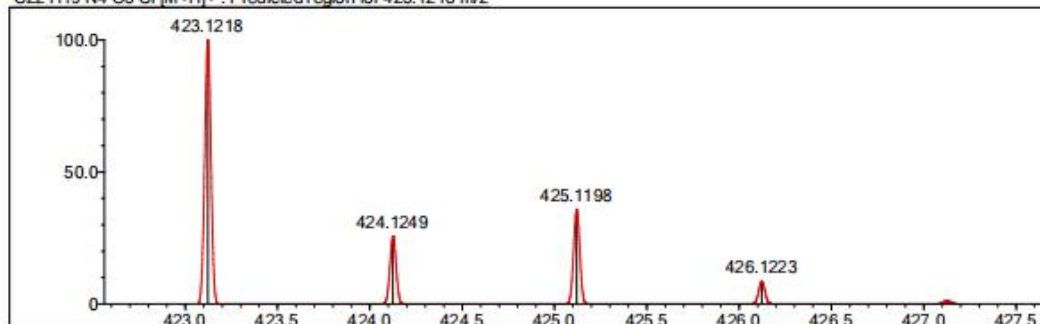

| Rank | Score | Formula (M)      | Ion                | Meas. m/z | Pred. m/z | Df. (mDa) | Df. (ppm) | Iso   | DBE  |
|------|-------|------------------|--------------------|-----------|-----------|-----------|-----------|-------|------|
| 1    | 78.64 | C22 H19 N4 O3 Cl | [M+H] <sup>+</sup> | 423.1222  | 423.1218  | 0.4       | 0.95      | 78.64 | 15.0 |



# HRMS spectrum of **4b**

| Elmt | Val | Min | Max | Elmt | Val | Min | Max | Elmt | Val | Min | Max | Use Adduct |
|------|-----|-----|-----|------|-----|-----|-----|------|-----|-----|-----|------------|
| H    | 1   | 0   | 21  | Al   | 3   | 0   | 0   | Zn   | 2   | 0   | 0   | K          |
| 2H   | 1   | 0   | 0   | Si   | 4   | 0   | 0   | Se   | 2   | 0   | 0   | H          |
| B    | 3   | 0   | 0   | P    | 3   | 0   | 0   | Br   | 1   | 0   | 0   | Na         |
| C    | 4   | 0   | 28  | S    | 2   | 0   | 0   | Ru   | 2   | 0   | 0   | NH4        |
| N    | 3   | 0   | 4   | Cl   | 1   | 0   | 1   | Sb   | 3   | 0   | 0   |            |
| O    | 2   | 0   | 4   | Fe   | 2   | 0   | 0   | I    | 3   | 0   | 0   |            |
| F    | 1   | 0   | 3   | Ni   | 2   | 0   | 0   | Ir   | 3   | 0   | 0   |            |
| Na   | 1   | 0   | 0   | Cu   | 2   | 0   | 0   | Pt   | 2   | 0   | 0   |            |

Error Margin (ppm): 100  
HC Ratio: 0.0 - 100.0  
Max Isotopes: all  
MSn Iso RI (%): 75.00

DBE Range: -100.0 - 100.0  
Apply N Rule: no  
Isotope RI (%): 1.00  
MSn Logic Mode: OR

Electron Ions: both  
Use MSn Info: yes  
Isotope Res: 10000  
Max Results: 100

Event#: 1 MS(E+) Ret. Time: 0.773 Scan#: 117

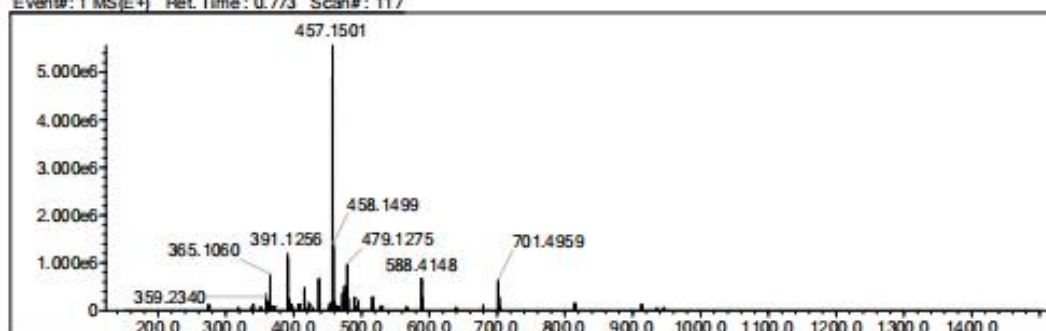

Measured region for 457.1501 m/z

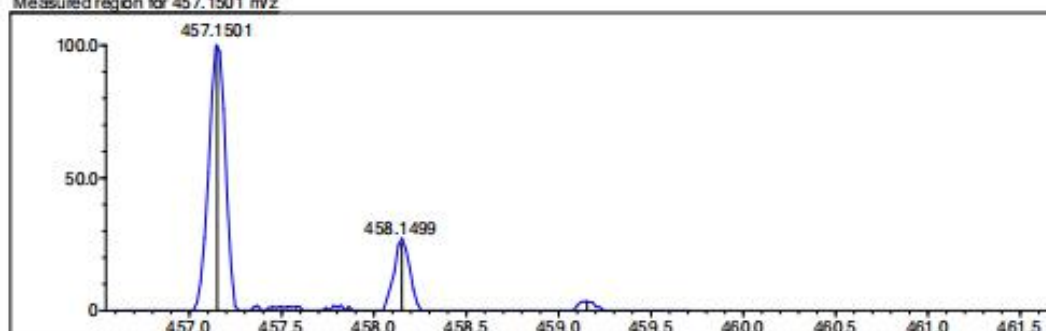

C23H19N4O3F3 [M+H]<sup>+</sup>: Predicted region for 457.1482 m/z

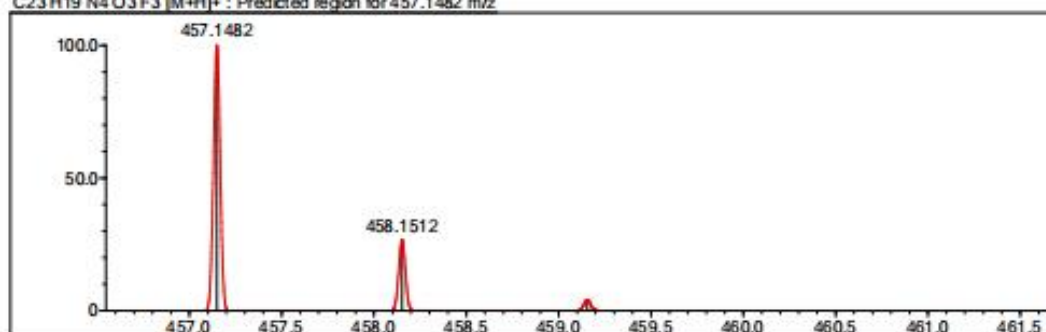

| Rank | Score | Formula (M)      | Ion                | Meas. m/z | Pred. m/z | Df. (mDa) | Df. (ppm) | Isot  | DBE  |
|------|-------|------------------|--------------------|-----------|-----------|-----------|-----------|-------|------|
| 5    | 77.49 | C23 H19 N4 O3 F3 | [M+H] <sup>+</sup> | 457.1501  | 457.1482  | 1.9       | 4.16      | 84.14 | 15.0 |

# HRMS spectrum of 4c

| Elmt | Val. | Min | Max | Elmt | Val. | Min | Max | Elmt | Val. | Min | Max | Use Adduct |
|------|------|-----|-----|------|------|-----|-----|------|------|-----|-----|------------|
| H    | 1    | 0   | 21  | Al   | 3    | 0   | 0   | Zn   | 2    | 0   | 0   | K          |
| 2H   | 1    | 0   | 0   | Si   | 4    | 0   | 0   | Se   | 2    | 0   | 0   | H          |
| B    | 3    | 0   | 0   | P    | 3    | 0   | 0   | Br   | 1    | 0   | 0   | Na         |
| C    | 4    | 0   | 28  | S    | 2    | 0   | 0   | Ru   | 2    | 0   | 0   | NH4        |
| N    | 3    | 0   | 4   | Cl   | 1    | 0   | 1   | Sb   | 3    | 0   | 0   |            |
| O    | 2    | 0   | 4   | Fe   | 2    | 0   | 0   | I    | 3    | 0   | 0   |            |
| F    | 1    | 0   | 3   | Ni   | 2    | 0   | 0   | Ir   | 3    | 0   | 0   |            |
| Na   | 1    | 0   | 0   | Cu   | 2    | 0   | 0   | Pt   | 2    | 0   | 0   |            |

Error Margin (ppm): 100  
HC Ratio: 0.0 - 100.0  
Max Isotopes: all  
MSn Iso RI (%): 75.00

DBE Range: -100.0 - 100.0  
Apply N Rule: no  
Isotope RI (%): 1.00  
MSn Logic Mode: OR

Electron Ions: both  
Use MSn Info: yes  
Isotope Res: 10000  
Max Results: 100

Event#: 1 MS(E+) Ret. Time : 0.827 Scan#: 125

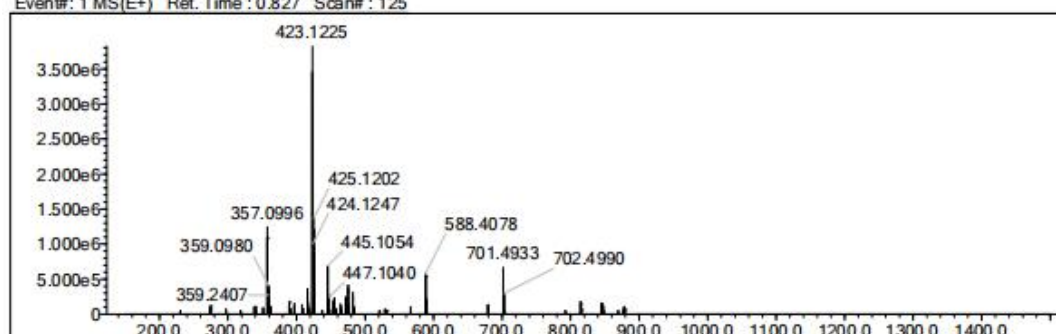

Measured region for 423.1225 m/z

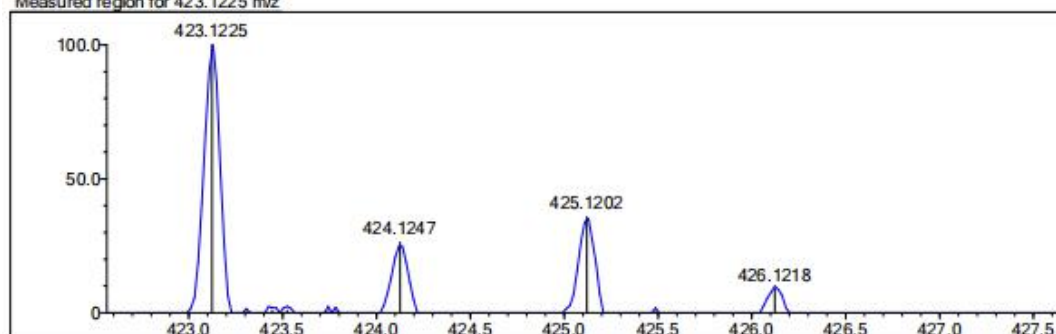

C22 H19 N4 O3 Cl [M+H]<sup>+</sup> : Predicted region for 423.1218 m/z

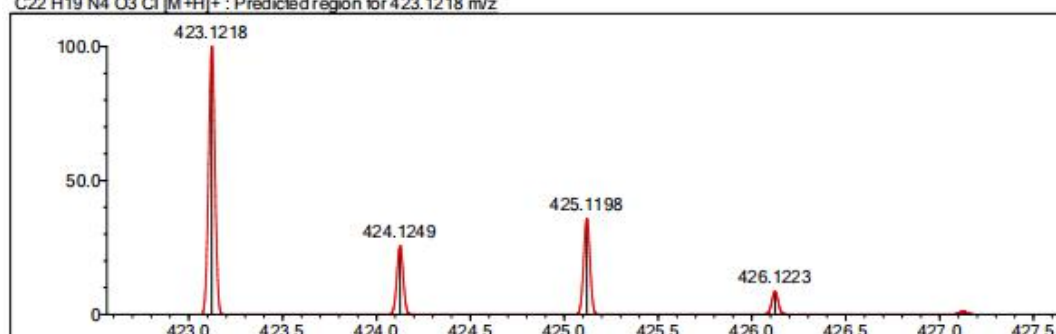

| Rank | Score | Formula (M)      | Ion                | Meas. m/z | Pred. m/z | Df. (mDa) | Df. (ppm) | Iso   | DBE  |
|------|-------|------------------|--------------------|-----------|-----------|-----------|-----------|-------|------|
| 1    | 93.26 | C22 H19 N4 O3 Cl | [M+H] <sup>+</sup> | 423.1225  | 423.1218  | 0.7       | 1.65      | 94.80 | 15.0 |

# HRMS spectrum of 8a

| Elmt | Val. | Min | Max | Elmt | Val. | Min | Max | Elmt | Val. | Min | Max | Use Adduct |
|------|------|-----|-----|------|------|-----|-----|------|------|-----|-----|------------|
| H    | 1    | 0   | 17  | Al   | 3    | 0   | 0   | Zn   | 2    | 0   | 0   | K          |
| 2H   | 1    | 0   | 0   | Si   | 4    | 0   | 0   | Se   | 2    | 0   | 0   | H          |
| B    | 3    | 0   | 0   | P    | 3    | 0   | 0   | Br   | 1    | 0   | 0   | Na         |
| C    | 4    | 0   | 23  | S    | 2    | 0   | 0   | Ru   | 2    | 0   | 0   | NH4        |
| N    | 3    | 0   | 4   | Cl   | 1    | 0   | 0   | Sb   | 3    | 0   | 0   |            |
| O    | 2    | 0   | 5   | Fe   | 2    | 0   | 0   | I    | 3    | 0   | 0   |            |
| F    | 1    | 0   | 3   | Ni   | 2    | 0   | 0   | Ir   | 3    | 0   | 0   |            |
| Na   | 1    | 0   | 0   | Cu   | 2    | 0   | 0   | Pt   | 2    | 0   | 0   |            |

Error Margin (ppm): 100  
HC Ratio: 0.0 - 100.0  
Max Isotopes: all  
MSn Iso RI (%): 75.00

DBE Range: -100.0 - 100.0  
Apply N Rule: no  
Isotope RI (%): 1.00  
MSn Logic Mode: OR

Electron Ions: both  
Use MSn Info: yes  
Isotope Res: 10000  
Max Results: 100

Event#: 1 MS(E+) Ret. Time : 0.773 Scan#: 117

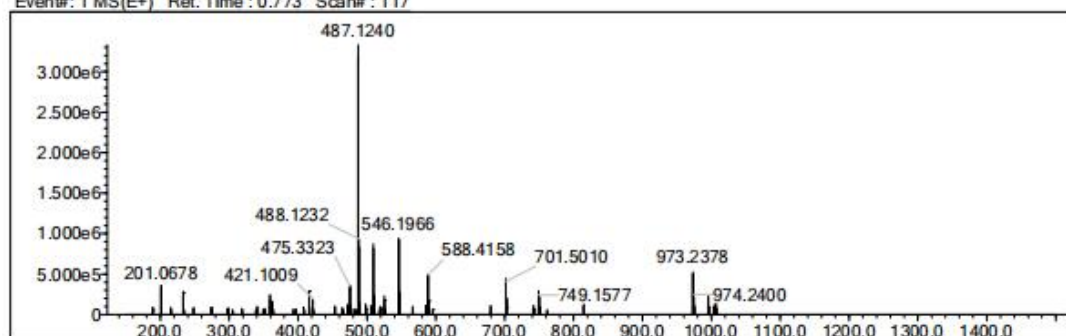

Measured region for 487.1240 m/z

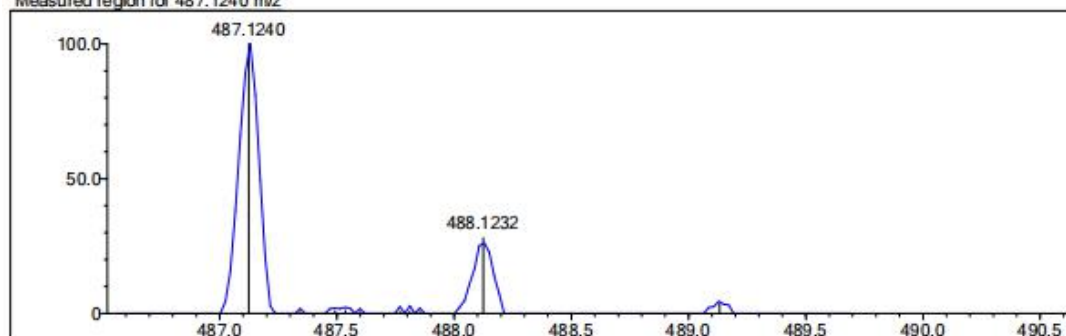

C23 H17 N4 O5 F3 [M+H]<sup>+</sup> : Predicted region for 487.1224 m/z

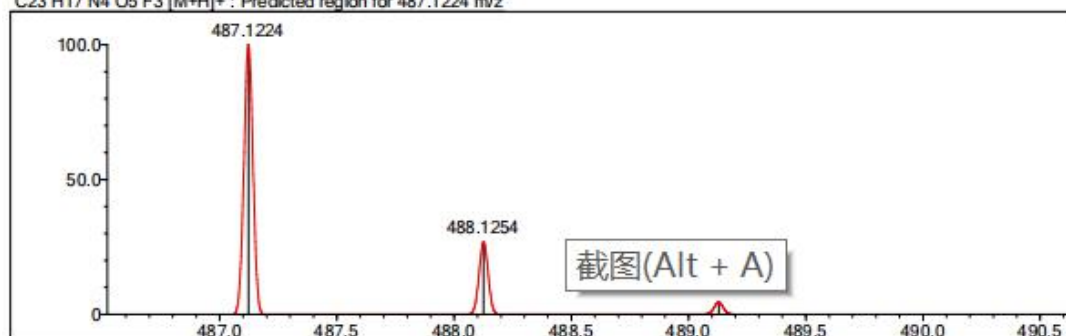

| Rank | Score | Formula (M)      | Ion                | Meas. m/z | Pred. m/z | Df. (mDa) | Df. (ppm) | Iso   | DBE  |
|------|-------|------------------|--------------------|-----------|-----------|-----------|-----------|-------|------|
| 1    | 82.22 | C23 H17 N4 O5 F3 | [M+H] <sup>+</sup> | 487.1240  | 487.1224  | 1.6       | 3.28      | 87.19 | 16.0 |

# HRMS spectrum of **8b**

| Elmt | Val. | Min | Max | Elmt | Val. | Min | Max | Elmt | Val. | Min | Max | Use Adduct |
|------|------|-----|-----|------|------|-----|-----|------|------|-----|-----|------------|
| H    | 1    | 0   | 25  | Al   | 3    | 0   | 0   | Zn   | 2    | 0   | 0   | K          |
| 2H   | 1    | 0   | 0   | Si   | 4    | 0   | 0   | Se   | 2    | 0   | 0   | H          |
| B    | 3    | 0   | 0   | P    | 3    | 0   | 0   | Br   | 1    | 0   | 0   | Na         |
| C    | 4    | 0   | 30  | S    | 2    | 0   | 0   | Ru   | 2    | 0   | 0   | NH4        |
| N    | 3    | 0   | 4   | Cl   | 1    | 0   | 1   | Sb   | 3    | 0   | 0   |            |
| O    | 2    | 0   | 4   | Fe   | 2    | 0   | 0   | I    | 3    | 0   | 0   |            |
| F    | 1    | 0   | 6   | Ni   | 2    | 0   | 0   | Ir   | 3    | 0   | 0   |            |
| Na   | 1    | 0   | 0   | Cu   | 2    | 0   | 0   | Pt   | 2    | 0   | 0   |            |

Error Margin (ppm): 100  
 HC Ratio: 0.0 - 100.0  
 Max Isotopes: all  
 MSn Iso RI (%): 75.00

DBE Range: -100.0 - 100.0  
 Apply N Rule: no  
 Isotope RI (%): 1.00  
 MSn Logic Mode: OR

Electron Ions: both  
 Use MSn Info: yes  
 Isotope Res: 10000  
 Max Results: 100

Event#: 1 MS(E+) Ret. Time : 0.760 Scan# : 115

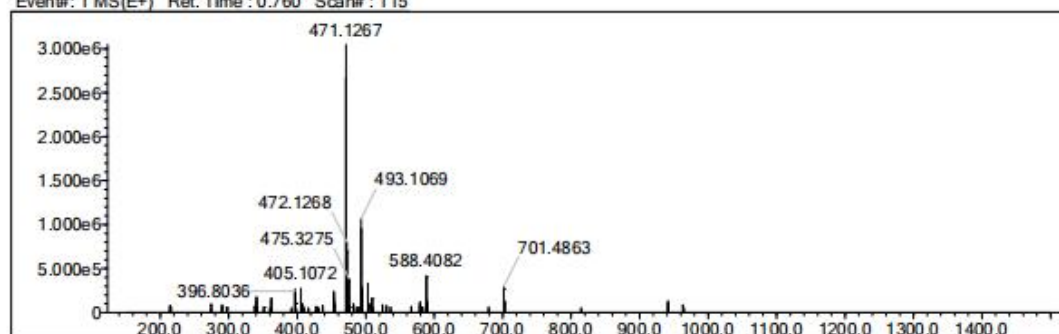

Measured region for 471.1267 m/z

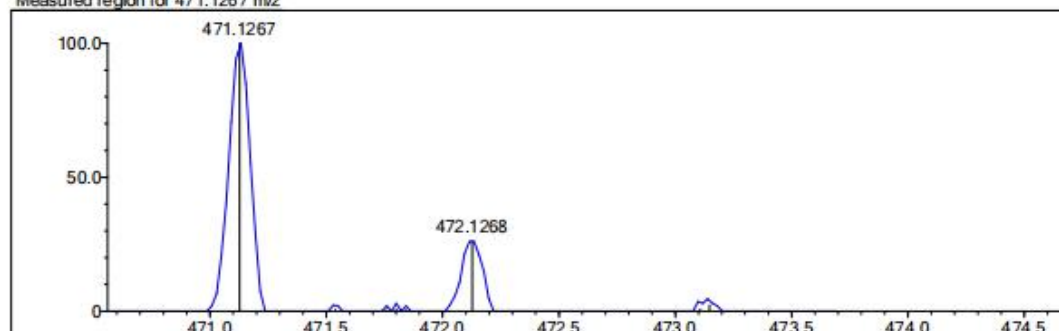

C23 H17 N4 O4 F3 [M+H]<sup>+</sup> : Predicted region for 471.1275 m/z

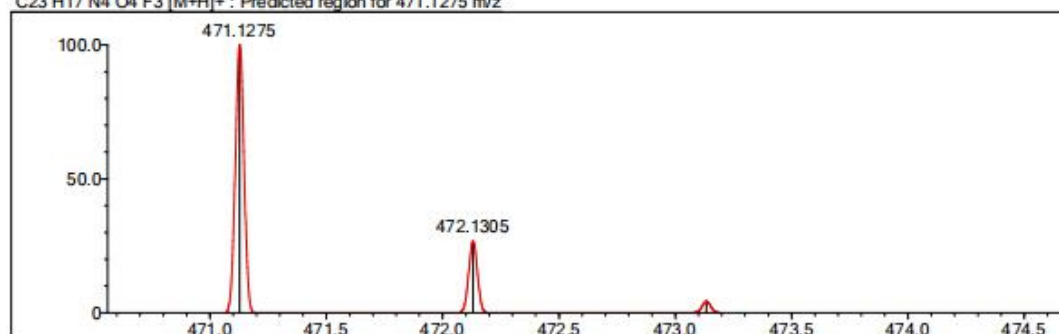

| Rank | Score | Formula (M)      | Ion                | Mess. m/z | Pred. m/z | Df. (mDa) | Df. (ppm) | Iso   | DBE  |
|------|-------|------------------|--------------------|-----------|-----------|-----------|-----------|-------|------|
| 5    | 87.87 | C23 H17 N4 O4 F3 | [M+H] <sup>+</sup> | 471.1267  | 471.1275  | -0.8      | -1.70     | 89.44 | 16.0 |

# HRMS spectrum of **8c**

| Elmt | Val. | Min | Max | Elmt | Val. | Min | Max | Elmt | Val. | Min | Max | Use Adduct |
|------|------|-----|-----|------|------|-----|-----|------|------|-----|-----|------------|
| H    | 1    | 0   | 25  | Al   | 3    | 0   | 0   | Zn   | 2    | 0   | 0   | K          |
| 2H   | 1    | 0   | 0   | Si   | 4    | 0   | 0   | Se   | 2    | 0   | 0   | H          |
| B    | 3    | 0   | 0   | P    | 3    | 0   | 0   | Br   | 1    | 0   | 0   | Na         |
| C    | 4    | 0   | 30  | S    | 2    | 0   | 0   | Ru   | 2    | 0   | 0   | NH4        |
| N    | 3    | 0   | 4   | Cl   | 1    | 0   | 1   | Sb   | 3    | 0   | 0   |            |
| O    | 2    | 0   | 4   | Fe   | 2    | 0   | 0   | I    | 3    | 0   | 0   |            |
| F    | 1    | 0   | 6   | Ni   | 2    | 0   | 0   | Ir   | 3    | 0   | 0   |            |
| Na   | 1    | 0   | 0   | Cu   | 2    | 0   | 0   | Pt   | 2    | 0   | 0   |            |

Error Margin (ppm): 100  
 HC Ratio: 0.0 - 100.0  
 Max Isotopes: all  
 MSn Iso RI (%): 75.00

DBE Range: -100.0 - 100.0  
 Apply N Rule: no  
 Isotope RI (%): 1.00  
 MSn Logic Mode: OR

Electron Ions: both  
 Use MSn Info: yes  
 Isotope Res: 10000  
 Max Results: 100

Event#: 1 MS(E+) Ret. Time : 0.827 Scan#: 125

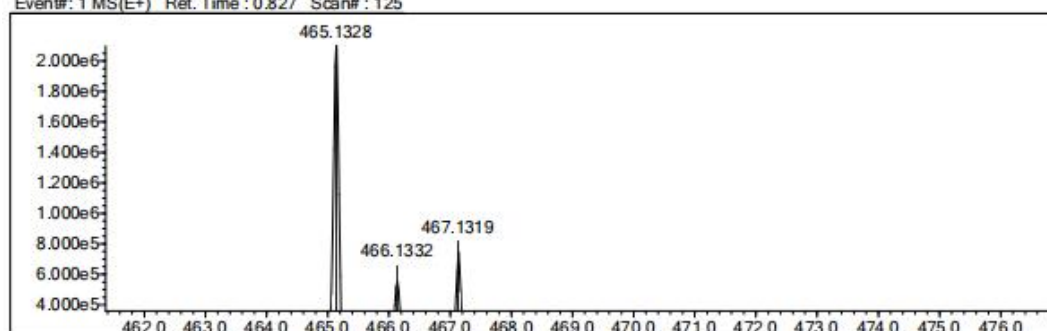

Measured region for 465.1328 m/z

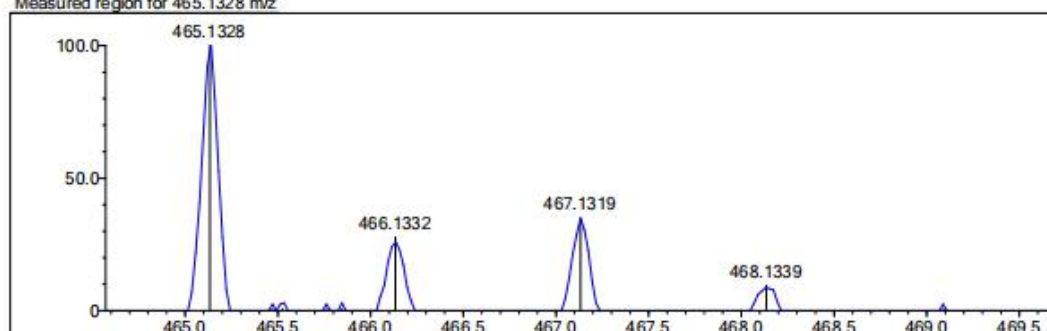

C24 H21 N4 O4 Cl [M+H]<sup>+</sup> : Predicted region for 465.1324 m/z

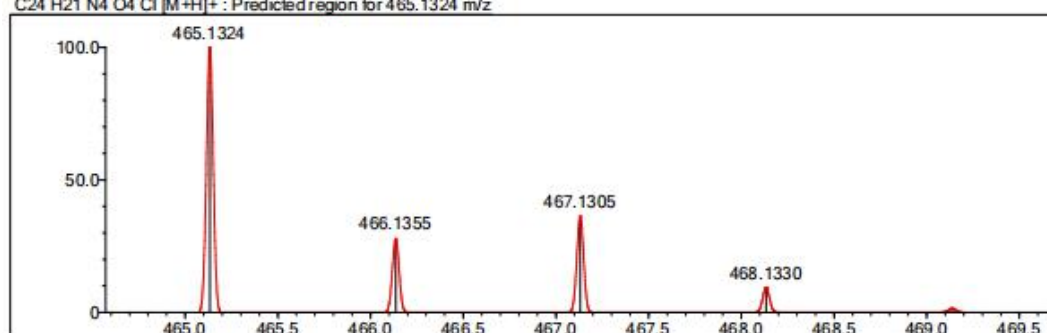

| Rank | Score | Formula (M)      | Ion                | Mess. m/z | Pred. m/z | Df. (mDa) | Df. (ppm) | Iso   | DBE  |
|------|-------|------------------|--------------------|-----------|-----------|-----------|-----------|-------|------|
| 6    | 89.13 | C24 H21 N4 O4 Cl | [M+H] <sup>+</sup> | 465.1328  | 465.1324  | 0.4       | 0.86      | 89.13 | 16.0 |



# HRMS spectrum of **8d**

| Elmt | Val. | Min | Max | Elmt | Val. | Min | Max | Elmt | Val. | Min | Max | Use Adduct |
|------|------|-----|-----|------|------|-----|-----|------|------|-----|-----|------------|
| H    | 1    | 0   | 25  | Al   | 3    | 0   | 0   | Zn   | 2    | 0   | 0   | K          |
| 2H   | 1    | 0   | 0   | Si   | 4    | 0   | 0   | Se   | 2    | 0   | 0   | H          |
| B    | 3    | 0   | 0   | P    | 3    | 0   | 0   | Br   | 1    | 0   | 0   | Na         |
| C    | 4    | 0   | 30  | S    | 2    | 0   | 0   | Ru   | 2    | 0   | 0   | NH4        |
| N    | 3    | 0   | 4   | Cl   | 1    | 0   | 1   | Sb   | 3    | 0   | 0   |            |
| O    | 2    | 0   | 4   | Fe   | 2    | 0   | 0   | I    | 3    | 0   | 0   |            |
| F    | 1    | 0   | 6   | Ni   | 2    | 0   | 0   | Ir   | 3    | 0   | 0   |            |
| Na   | 1    | 0   | 0   | Cu   | 2    | 0   | 0   | Pt   | 2    | 0   | 0   |            |

Error Margin (ppm): 100  
HC Ratio: 0.0 - 100.0  
Max Isotopes: all  
MSn Iso RI (%): 75.00

DBE Range: -100.0 - 100.0  
Apply N Rule: no  
Isotope RI (%): 1.00  
MSn Logic Mode: OR

Electron Ions: both  
Use MSn Info: yes  
Isotope Res: 10000  
Max Results: 100

Event#: 1 MS(E+) Ret. Time: 0.880 Scan#: 133

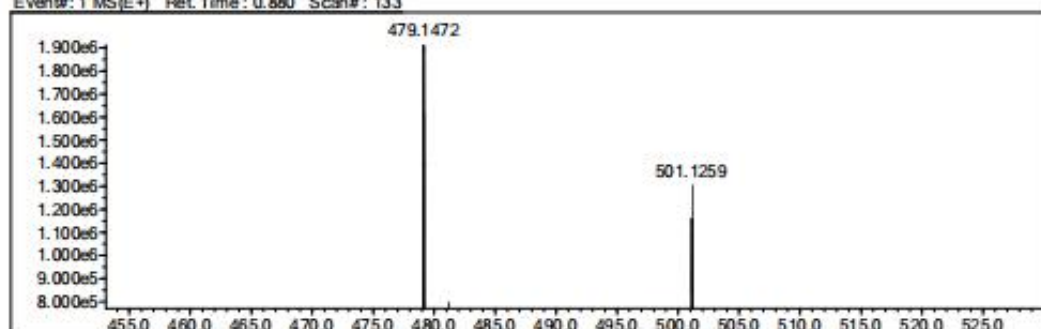

Measured region for 479.1472 m/z

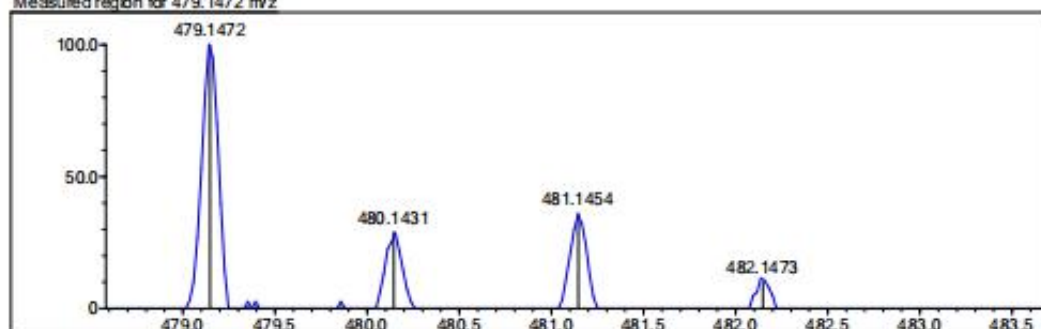

C25 H23 N4 O4 Cl [M+H]<sup>+</sup>: Predicted region for 479.1481 m/z

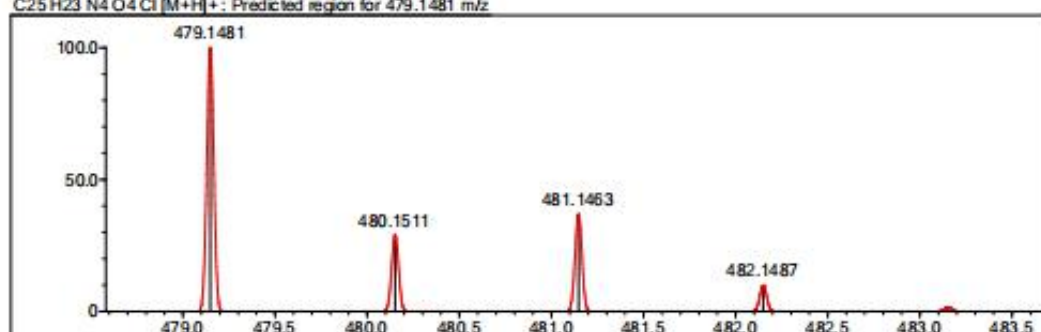

| Rank | Score | Formula (M)      | Ion                | Meas. m/z | Pred. m/z | Df. (mDa) | Df. (ppm) | Isot  | DBE  |
|------|-------|------------------|--------------------|-----------|-----------|-----------|-----------|-------|------|
| 5    | 95.78 | C25 H23 N4 O4 Cl | [M+H] <sup>+</sup> | 479.1472  | 479.1481  | -0.9      | -1.88     | 97.94 | 16.0 |

# HRMS spectrum of 11a

| Elmt | Val. | Min | Max | Use Adduct |
|------|------|-----|-----|------|------|-----|-----|------|------|-----|-----|------|------|-----|-----|------------|
| H    | 1    | 0   | 25  | O    | 2    | 0   | 4   | S    | 2    | 0   | 0   | Br   | 1    | 0   | 0   | H          |
| 2H   | 1    | 0   | 0   | 18O  | 2    | 0   | 0   | Cl   | 1    | 0   | 0   | Pd   | 2    | 0   | 0   |            |
| B    | 3    | 0   | 0   | F    | 1    | 0   | 0   | K    | 1    | 0   | 0   | I    | 3    | 0   | 0   |            |
| C    | 4    | 0   | 25  | Si   | 4    | 0   | 0   | Mn   | 3    | 0   | 0   | Pt   | 2    | 0   | 0   |            |
| N    | 3    | 0   | 4   | P    | 3    | 0   | 0   | Se   | 2    | 0   | 0   |      |      |     |     |            |

Error Margin (ppm): 100  
HC Ratio: 0.0 - 10.0  
Max Isotopes: all  
MSn Iso RI (%): 75.00

DBE Range: not fixed  
Apply N Rule: no  
Isotope RI (%): 1.00  
MSn Logic Mode: AND

Electron Ions: both  
Use MSn Info: no  
Isotope Res: 10000  
Max Results: 100

Event#: 1 MS(E+) Ret. Time : 0.853 Scan#: 129

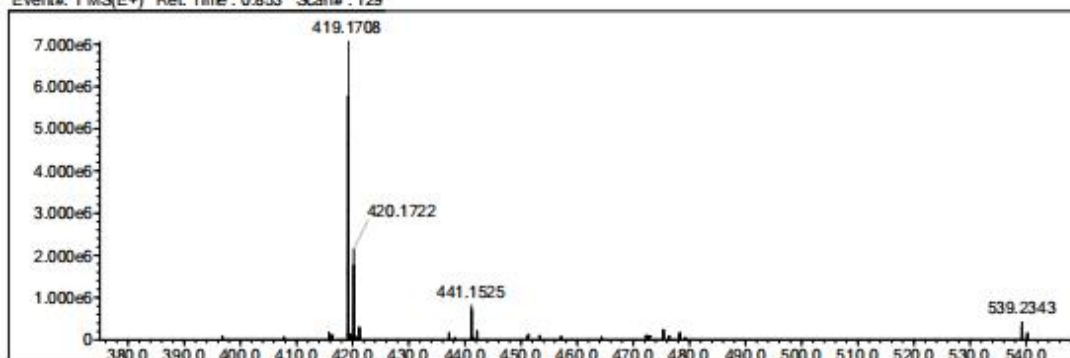

Measured region for 419.1708 m/z

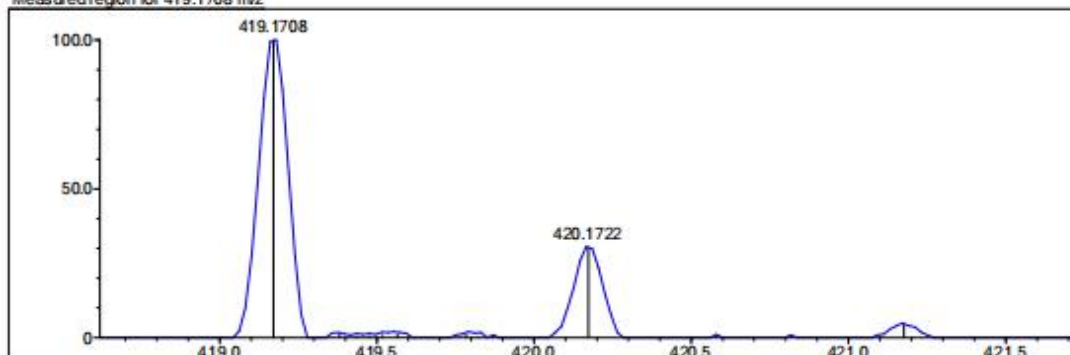

C23 H22 N4 O4 [M+H]<sup>+</sup> : Predicted region for 419.1714 m/z

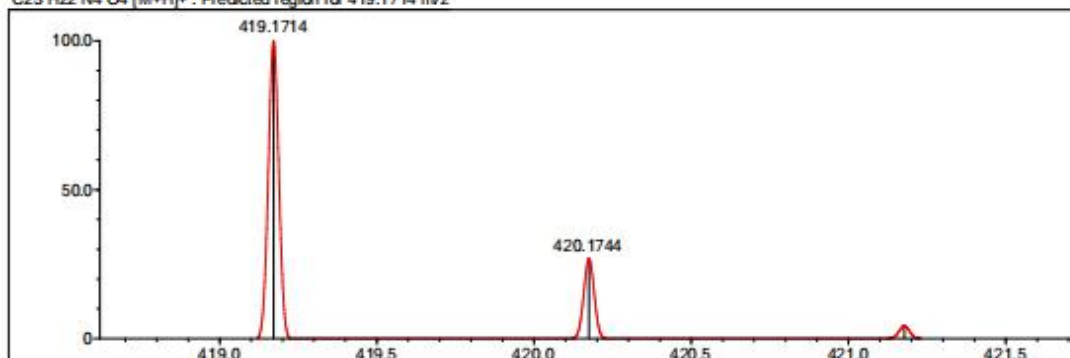

| Rank | Score | Formula (M) | Ion                | Mass, m/z | Pred. m/z | Df, (mDa) | Df, (ppm) | Iso   | DBE  |
|------|-------|-------------|--------------------|-----------|-----------|-----------|-----------|-------|------|
| 1    | 72.95 | C23H22N4O4  | [M+H] <sup>+</sup> | 419.1708  | 419.1714  | -0.6      | -1.43     | 73.74 | 15.0 |

# HRMS spectrum of **11b**

| Elmt | Val. | Min | Max | Elmt | Val. | Min | Max | Elmt | Val. | Min | Max | Use Adduct |
|------|------|-----|-----|------|------|-----|-----|------|------|-----|-----|------------|
| H    | 1    | 0   | 23  | Al   | 3    | 0   | 0   | Zn   | 2    | 0   | 0   | K          |
| 2H   | 1    | 0   | 0   | Si   | 4    | 0   | 0   | Se   | 2    | 0   | 0   | H          |
| B    | 3    | 0   | 0   | P    | 3    | 0   | 0   | Br   | 1    | 0   | 0   | Na         |
| C    | 4    | 0   | 25  | S    | 2    | 0   | 0   | Ru   | 2    | 0   | 0   | NH4        |
| N    | 3    | 0   | 5   | Cl   | 1    | 0   | 1   | Sb   | 3    | 0   | 0   |            |
| O    | 2    | 0   | 5   | Fe   | 2    | 0   | 0   | I    | 3    | 0   | 0   |            |
| F    | 1    | 0   | 3   | Ni   | 2    | 0   | 0   | Ir   | 3    | 0   | 0   |            |
| Na   | 1    | 0   | 0   | Cu   | 2    | 0   | 0   | Pt   | 2    | 0   | 0   |            |

Error Margin (ppm): 100  
 HC Ratio: 0.0 - 100.0  
 Max Isotopes: all  
 MSn Iso RI (%): 75.00

DBE Range: -100.0 - 100.0  
 Apply N Rule: no  
 Isotope RI (%): 1.00  
 MSn Logic Mode: OR

Electron Ions: both  
 Use MSn Info: yes  
 Isotope Res: 10000  
 Max Results: 100

Event#: 1 MS(E+) Ret. Time: 0.840 Scan#: 127

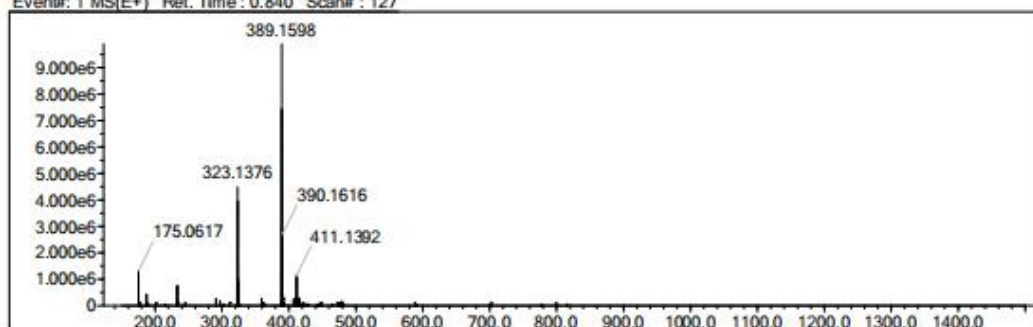

Measured region for 389.1598 m/z

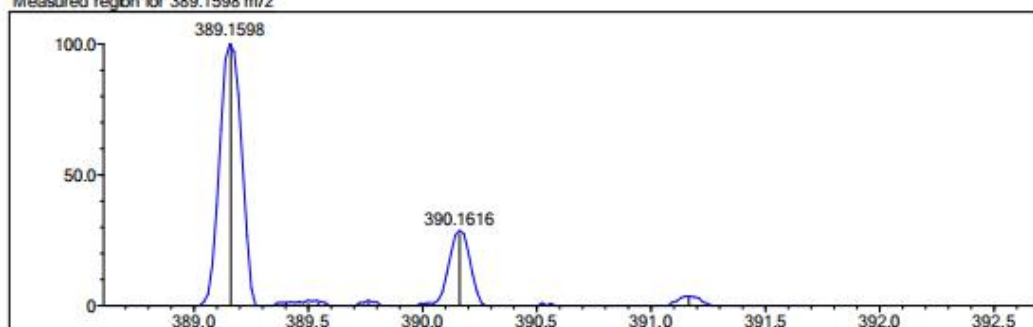

C22 H20 N4 O3 [M+H]<sup>+</sup> : Predicted region for 389.1608 m/z

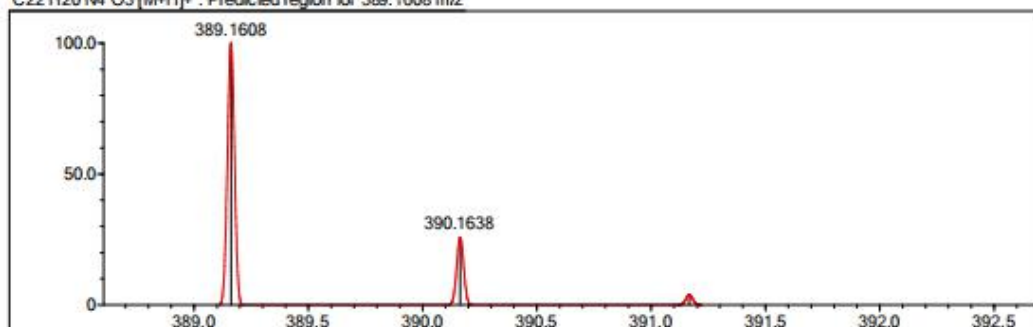

| Rank | Score | Formula (M)   | Ion                | Meas. m/z | Pred. m/z | Df. (mDa) | Df. (ppm) | Iso   | DBE  |
|------|-------|---------------|--------------------|-----------|-----------|-----------|-----------|-------|------|
| 4    | 73.41 | C22 H20 N4 O3 | [M+H] <sup>+</sup> | 389.1598  | 389.1608  | -1.0      | -2.57     | 76.41 | 15.0 |



# HRMS spectrum of **11c**

| Elmt | Val. | Min | Max | Use Adduct |
|------|------|-----|-----|------|------|-----|-----|------|------|-----|-----|------|------|-----|-----|------------|
| H    | 1    | 0   | 25  | O    | 2    | 0   | 4   | S    | 2    | 0   | 0   | Br   | 1    | 0   | 0   | H          |
| 2H   | 1    | 0   | 0   | 18O  | 2    | 0   | 0   | Cl   | 1    | 0   | 1   | Pd   | 2    | 0   | 0   |            |
| B    | 3    | 0   | 0   | F    | 1    | 0   | 0   | K    | 1    | 0   | 0   | I    | 3    | 0   | 0   |            |
| C    | 4    | 0   | 25  | Si   | 4    | 0   | 0   | Mn   | 3    | 0   | 0   | Pt   | 2    | 0   | 0   |            |
| N    | 3    | 0   | 4   | P    | 3    | 0   | 0   | Se   | 2    | 0   | 0   |      |      |     |     |            |

Error Margin (ppm): 100  
 HC Ratio: 0.0 - 10.0  
 Max Isotopes: all  
 MSn Iso RI (%): 75.00

DBE Range: not fixed  
 Apply N Rule: no  
 Isotope RI (%): 1.00  
 MSn Logic Mode: AND

Electron Ions: both  
 Use MSn Info: no  
 Isotope Res: 10000  
 Max Results: 100

Event#: 1 MS(E+) Ret. Time: 0.760 Scan#: 115

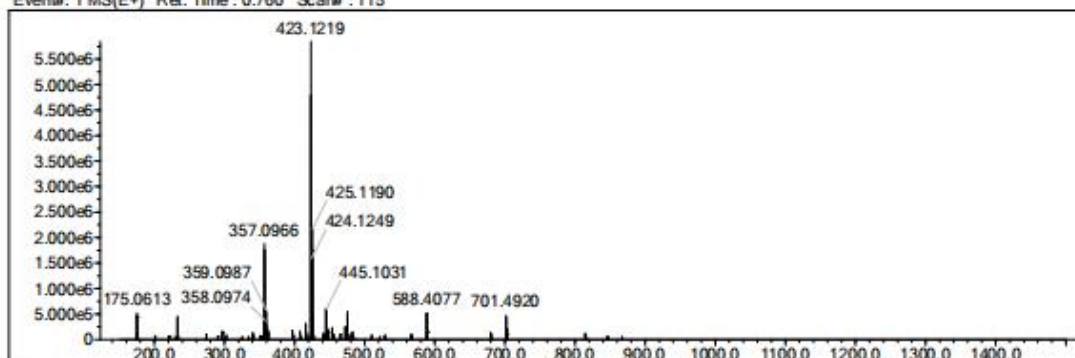

Measured region for 423.1219 m/z

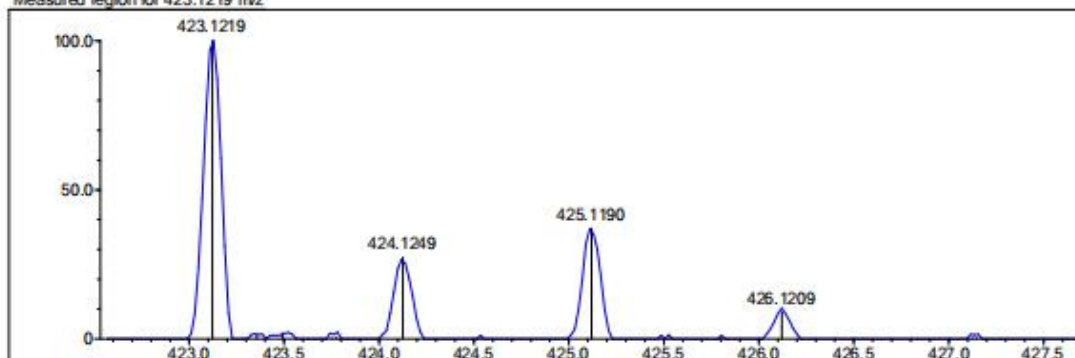

C22 H19 N4 O3 Cl [M+H]<sup>+</sup> : Predicted region for 423.1218 m/z

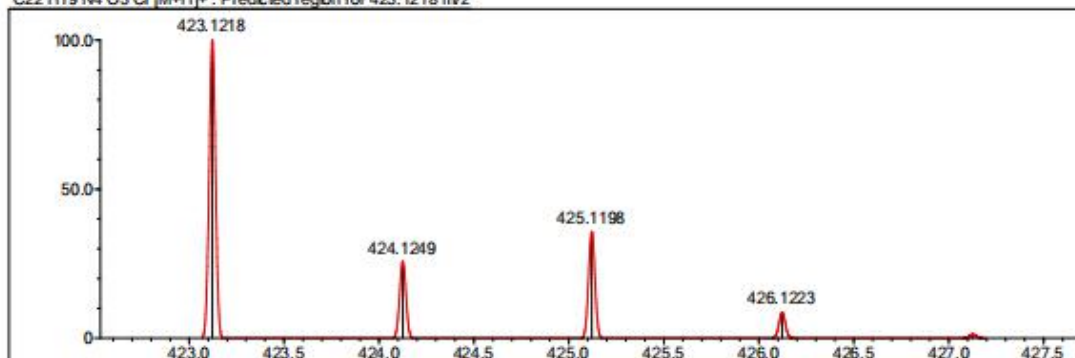

| Rank | Score | Formula (M)      | Ion                | Meas. m/z | Pred. m/z | Df. (mDa) | Df. (ppm) | Iso   | DBE  |
|------|-------|------------------|--------------------|-----------|-----------|-----------|-----------|-------|------|
| 1    | 90.94 | C22 H19 N4 O3 Cl | [M+H] <sup>+</sup> | 423.1219  | 423.1218  | 0.1       | 0.24      | 90.94 | 15.0 |

# HRMS spectrum of **11d**

| Elmt | Val. | Min | Max | Elmt | Val. | Min | Max | Elmt | Val. | Min | Max | Use Adduct |
|------|------|-----|-----|------|------|-----|-----|------|------|-----|-----|------------|
| H    | 1    | 0   | 23  | Al   | 3    | 0   | 0   | Zn   | 2    | 0   | 0   | K          |
| 2H   | 1    | 0   | 0   | Si   | 4    | 0   | 0   | Se   | 2    | 0   | 0   | H          |
| B    | 3    | 0   | 0   | P    | 3    | 0   | 0   | Br   | 1    | 0   | 0   | Na         |
| C    | 4    | 0   | 25  | S    | 2    | 0   | 0   | Ru   | 2    | 0   | 0   | NH4        |
| N    | 3    | 0   | 5   | Cl   | 1    | 0   | 1   | Sb   | 3    | 0   | 0   |            |
| O    | 2    | 0   | 5   | Fe   | 2    | 0   | 0   | I    | 3    | 0   | 0   |            |
| F    | 1    | 0   | 3   | Ni   | 2    | 0   | 0   | Ir   | 3    | 0   | 0   |            |
| Na   | 1    | 0   | 0   | Cu   | 2    | 0   | 0   | Pt   | 2    | 0   | 0   |            |

Error Margin (ppm): 100  
 HC Ratio: 0.0 - 100.0  
 Max Isotopes: all  
 MSn Iso RI (%): 75.00

DBE Range: -100.0 - 100.0  
 Apply N Rule: no  
 Isotope RI (%): 1.00  
 MSn Logic Mode: OR

Electron Ions: both  
 Use MSn Info: yes  
 Isotope Res: 10000  
 Max Results: 100

Event#: 1 MS(E+) Ret. Time : 0.760 Scan#: 115

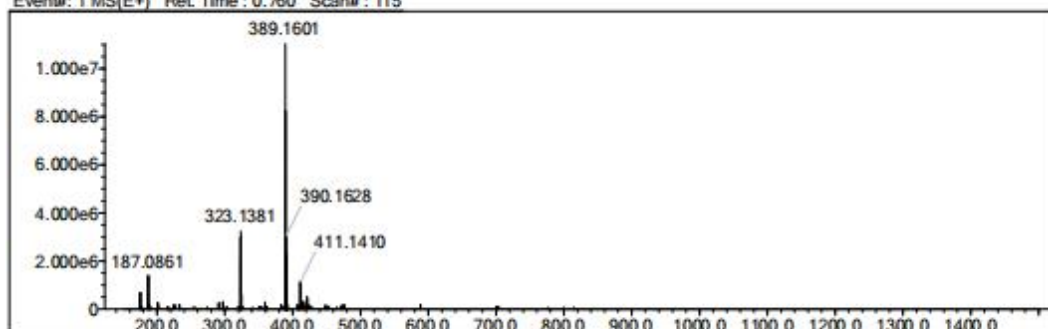

Measured region for 389.1601 m/z

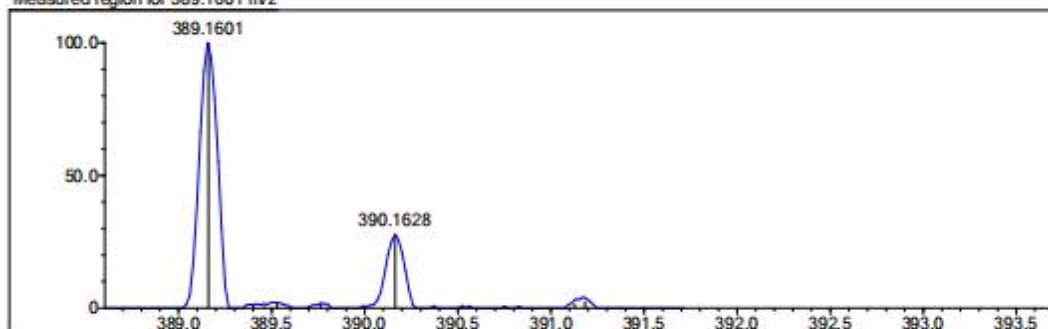

C22 H20 N4 O3 [M+H]<sup>+</sup> : Predicted region for 389.1608 m/z

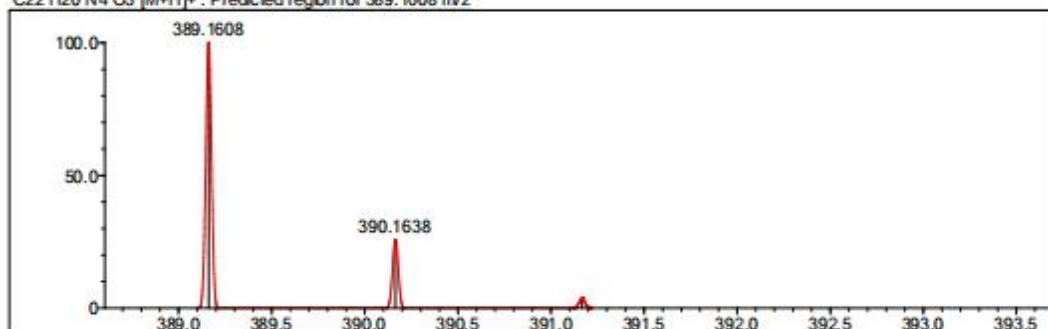

| Rank | Score | Formula (M)   | Ion                | Meas. m/z | Pred. m/z | Df. (mDa) | Df. (ppm) | Iso   | DBE  |
|------|-------|---------------|--------------------|-----------|-----------|-----------|-----------|-------|------|
| 4    | 70.11 | C22 H20 N4 O3 | [M+H] <sup>+</sup> | 389.1601  | 389.1608  | -0.7      | -1.80     | 71.54 | 15.0 |

# HRMS spectrum of **11e**

| Elmt | Val. | Min | Max | Use Adduct |
|------|------|-----|-----|------|------|-----|-----|------|------|-----|-----|------|------|-----|-----|------------|
| H    | 1    | 0   | 25  | O    | 2    | 0   | 4   | S    | 2    | 0   | 0   | Br   | 1    | 0   | 0   | H          |
| 2H   | 1    | 0   | 0   | 18O  | 2    | 0   | 0   | Cl   | 1    | 0   | 1   | Pd   | 2    | 0   | 0   |            |
| B    | 3    | 0   | 0   | F    | 1    | 0   | 0   | K    | 1    | 0   | 0   | I    | 3    | 0   | 0   |            |
| C    | 4    | 0   | 25  | Si   | 4    | 0   | 0   | Mn   | 3    | 0   | 0   | Pt   | 2    | 0   | 0   |            |
| N    | 3    | 0   | 4   | P    | 3    | 0   | 0   | Se   | 2    | 0   | 0   |      |      |     |     |            |

Error Margin (ppm): 100  
 HC Ratio: 0.0 - 10.0  
 Max Isotopes: all  
 MSn Iso RI (%): 75.00

DBE Range: not fixed  
 Apply N Rule: no  
 Isotope RI (%): 1.00  
 MSn Logic Mode: AND

Electron Ions: both  
 Use MSn Info: no  
 Isotope Res: 10000  
 Max Results: 100

Event#: 1 MS(E+) Ret. Time: 0.773 Scan#: 117

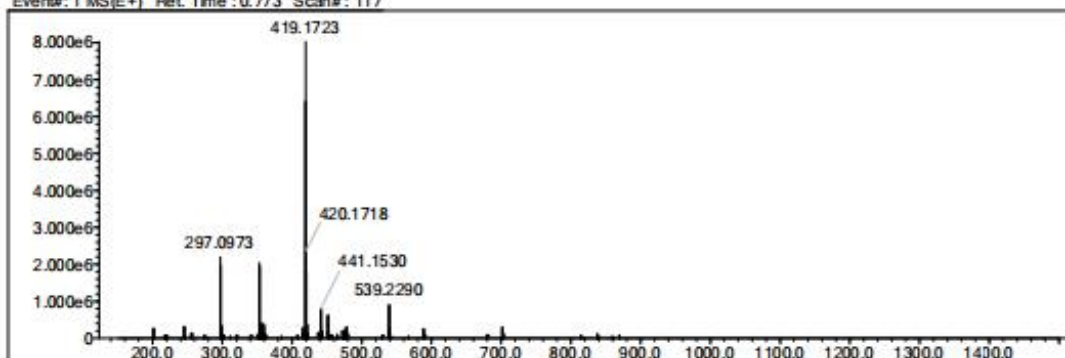

Measured region for 419.1723 m/z

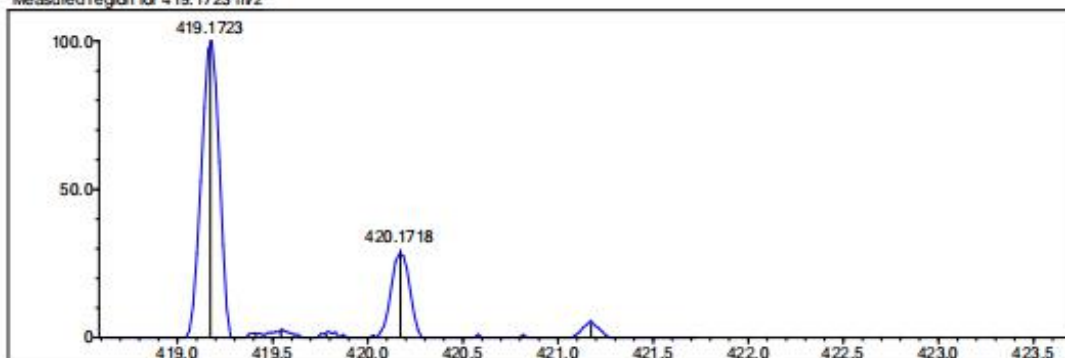

C23 H22 N4 O4 [M+H]<sup>+</sup> : Predicted region for 419.1714 m/z

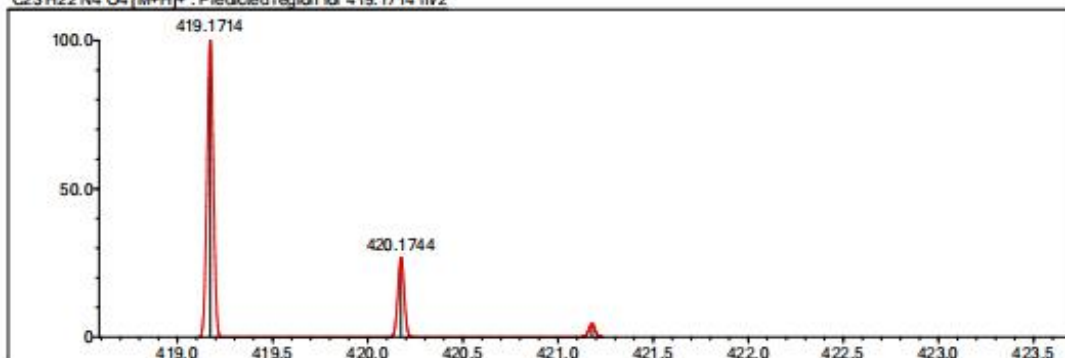

| Rank | Score | Formula (M)   | Ion                | Mass. m/z | Pred. m/z | Df. (mDa) | Df. (ppm) | Isc   | DBE  |
|------|-------|---------------|--------------------|-----------|-----------|-----------|-----------|-------|------|
| 1    | 71.53 | C23 H22 N4 O4 | [M+H] <sup>+</sup> | 419.1723  | 419.1714  | 0.9       | 2.15      | 73.65 | 15.0 |

# HRMS spectrum of **11f**

| Elmt | Val. | Min | Max | Elmt | Val. | Min | Max | Elmt | Val. | Min | Max | Use Adduct |
|------|------|-----|-----|------|------|-----|-----|------|------|-----|-----|------------|
| H    | 1    | 0   | 23  | Al   | 3    | 0   | 0   | Zn   | 2    | 0   | 0   | K          |
| 2H   | 1    | 0   | 0   | Si   | 4    | 0   | 0   | Se   | 2    | 0   | 0   | H          |
| B    | 3    | 0   | 0   | P    | 3    | 0   | 0   | Br   | 1    | 0   | 0   | Na         |
| C    | 4    | 0   | 25  | S    | 2    | 0   | 0   | Ru   | 2    | 0   | 0   | NH4        |
| N    | 3    | 0   | 5   | Cl   | 1    | 0   | 1   | Sb   | 3    | 0   | 0   |            |
| O    | 2    | 0   | 5   | Fe   | 2    | 0   | 0   | I    | 3    | 0   | 0   |            |
| F    | 1    | 0   | 3   | Ni   | 2    | 0   | 0   | Ir   | 3    | 0   | 0   |            |
| Na   | 1    | 0   | 0   | Cu   | 2    | 0   | 0   | Pt   | 2    | 0   | 0   |            |

Error Margin (ppm): 100  
HC Ratio: 0.0 - 100.0  
Max Isotopes: all  
MSn Iso RI (%): 75.00

DBE Range: -100.0 - 100.0  
Apply N Rule: no  
Isotope RI (%): 1.00  
MSn Logic Mode: OR

Electron Ions: both  
Use MSn Info: yes  
Isotope Res: 10000  
Max Results: 100

Event#: 1 MS(E+) Ret. Time: 0.773 Scan#: 117

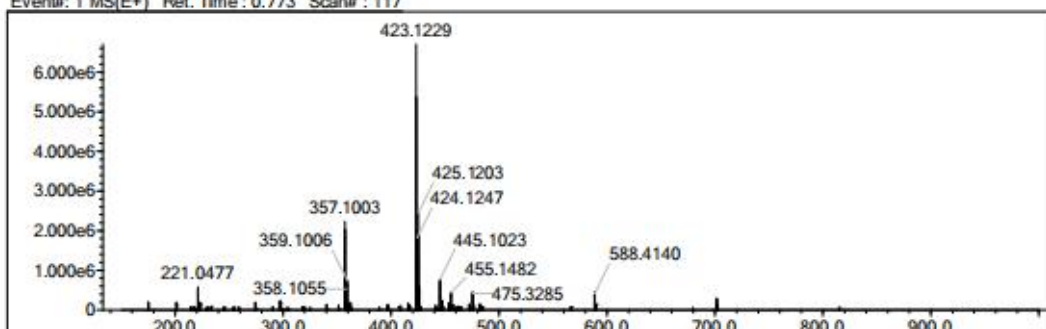

Measured region for 423.1229 m/z

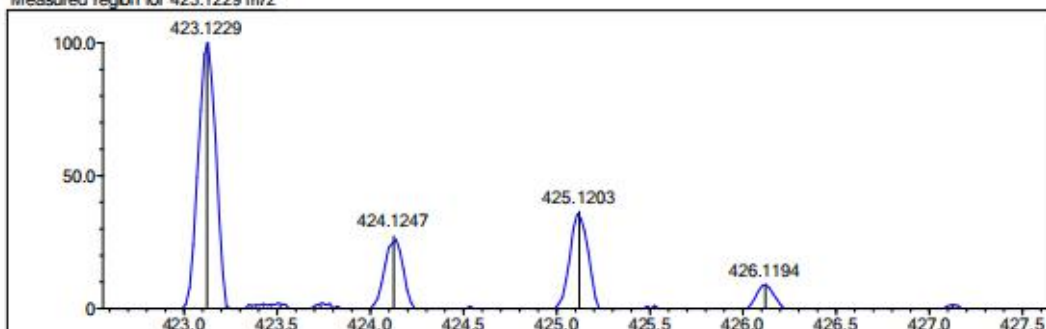

C22 H19 N4 O3 Cl [M+H]<sup>+</sup> : Predicted region for 423.1218 m/z

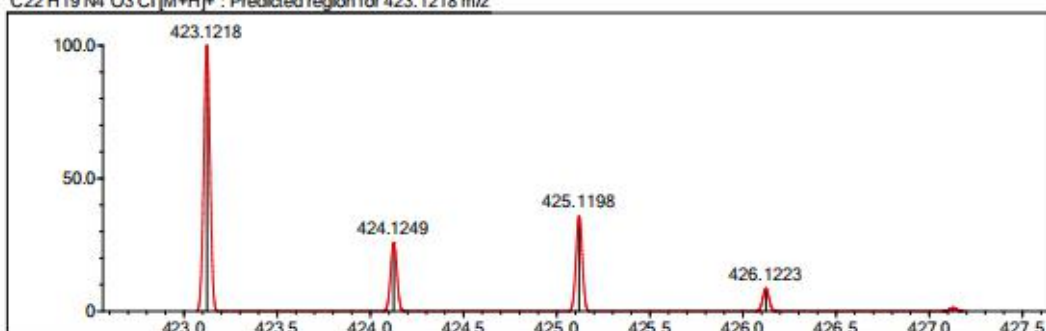

| Rank | Score | Formula (M)      | Ion                | Meas. m/z | Pred. m/z | Df. (mDa) | Df. (ppm) | Iso   | DBE  |
|------|-------|------------------|--------------------|-----------|-----------|-----------|-----------|-------|------|
| 9    | 88.67 | C22 H19 N4 O3 Cl | [M+H] <sup>+</sup> | 423.1229  | 423.1218  | 1.1       | 2.60      | 92.36 | 15.0 |

# HRMS spectrum of **11g**

| Elmt | Val. | Min | Max | Elmt | Val. | Min | Max | Elmt | Val. | Min | Max | Use Adduct |
|------|------|-----|-----|------|------|-----|-----|------|------|-----|-----|------------|
| H    | 1    | 0   | 23  | Al   | 3    | 0   | 0   | Zn   | 2    | 0   | 0   | K          |
| 2H   | 1    | 0   | 0   | Si   | 4    | 0   | 0   | Se   | 2    | 0   | 0   | H          |
| B    | 3    | 0   | 0   | P    | 3    | 0   | 0   | Br   | 1    | 0   | 0   | Na         |
| C    | 4    | 0   | 25  | S    | 2    | 0   | 0   | Ru   | 2    | 0   | 0   | NH4        |
| N    | 3    | 0   | 5   | Cl   | 1    | 0   | 1   | Sb   | 3    | 0   | 0   |            |
| O    | 2    | 0   | 5   | Fe   | 2    | 0   | 0   | I    | 3    | 0   | 0   |            |
| F    | 1    | 0   | 3   | Ni   | 2    | 0   | 0   | Ir   | 3    | 0   | 0   |            |
| Na   | 1    | 0   | 0   | Cu   | 2    | 0   | 0   | Pt   | 2    | 0   | 0   |            |

Error Margin (ppm): 100

HC Ratio: 0.0 - 100.0

Max Isotopes: all

MSn Iso RI (%): 75.00

DBE Range: -100.0 - 100.0

Apply N Rule: no

Isotope RI (%): 1.00

MSn Logic Mode: OR

Electron Ions: both

Use MSn Info: yes

Isotope Res: 10000

Max Results: 100

Event#: 1 MS(E+) Ret. Time: 0.787 Scan#: 119

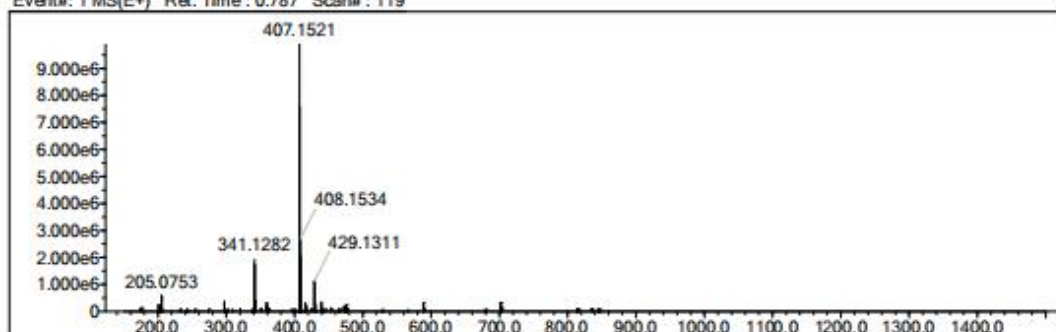

Measured region for 407.1521 m/z

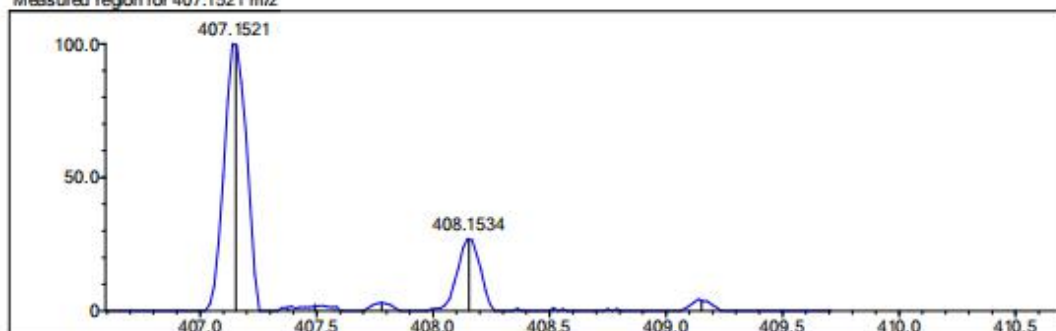

C22 H19 N4 O3 F [M+H]<sup>+</sup>: Predicted region for 407.1514 m/z

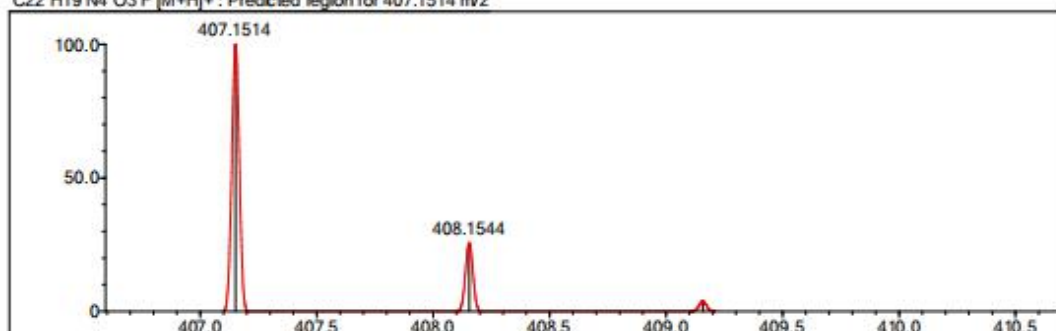

| Rank | Score | Formula (M)     | Ion                | Meas. m/z | Pred. m/z | Df. (mDa) | Df. (ppm) | Iso   | DBE  |
|------|-------|-----------------|--------------------|-----------|-----------|-----------|-----------|-------|------|
| 2    | 72.69 | C22 H19 N4 O3 F | [M+H] <sup>+</sup> | 407.1521  | 407.1514  | 0.7       | 1.72      | 74.03 | 15.0 |



# HRMS spectrum of **11h**

| Elmt | Val. | Min | Max | Elmt | Val. | Min | Max | Elmt | Val. | Min | Max | Use Adduct |
|------|------|-----|-----|------|------|-----|-----|------|------|-----|-----|------------|
| H    | 1    | 0   | 25  | Al   | 3    | 0   | 0   | Zn   | 2    | 0   | 0   | K          |
| 2H   | 1    | 0   | 0   | Si   | 4    | 0   | 0   | Se   | 2    | 0   | 0   | H          |
| B    | 3    | 0   | 0   | P    | 3    | 0   | 0   | Br   | 1    | 0   | 0   | Na         |
| C    | 4    | 0   | 25  | S    | 2    | 0   | 0   | Ru   | 2    | 0   | 0   | NH4        |
| N    | 3    | 0   | 4   | Cl   | 1    | 0   | 0   | Sb   | 3    | 0   | 0   |            |
| O    | 2    | 0   | 4   | Fe   | 2    | 0   | 0   | I    | 3    | 0   | 0   |            |
| F    | 1    | 0   | 3   | Ni   | 2    | 0   | 0   | Ir   | 3    | 0   | 0   |            |
| Na   | 1    | 0   | 0   | Cu   | 2    | 0   | 0   | Pt   | 2    | 0   | 0   |            |

Error Margin (ppm): 100  
HC Ratio: 0.0 - 100.0  
Max Isotopes: all  
MSn Iso RI (%): 75.00

DBE Range: -100.0 - 100.0  
Apply N Rule: no  
Isotope RI (%): 1.00  
MSn Logic Mode: OR

Electron Ions: both  
Use MSn Info: yes  
Isotope Res: 10000  
Max Results: 100

Event#: 1 MS(E+) Ret. Time: 0.853 Scan#: 129

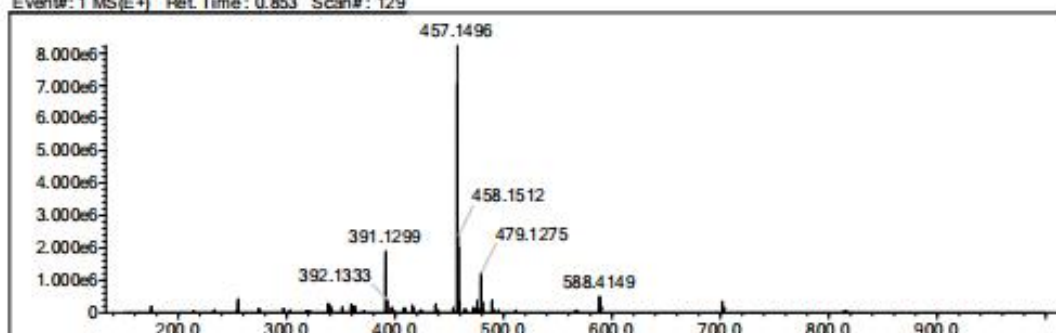

Measured region for 457.1496 m/z

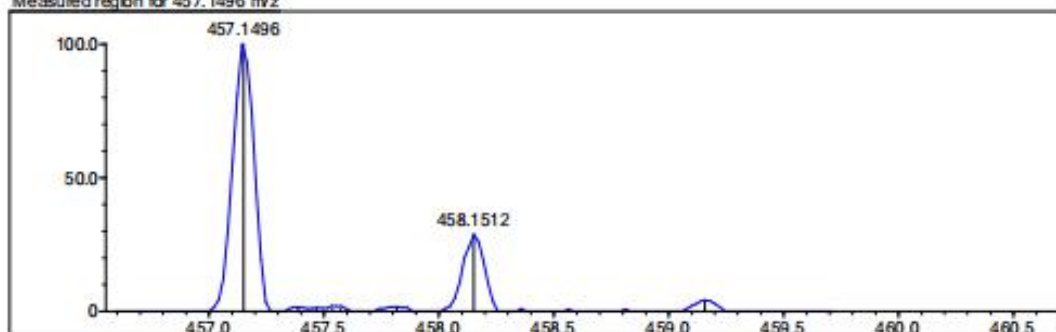

C23H19N4O3F3 [M+H]<sup>+</sup> : Predicted region for 457.1482 m/z

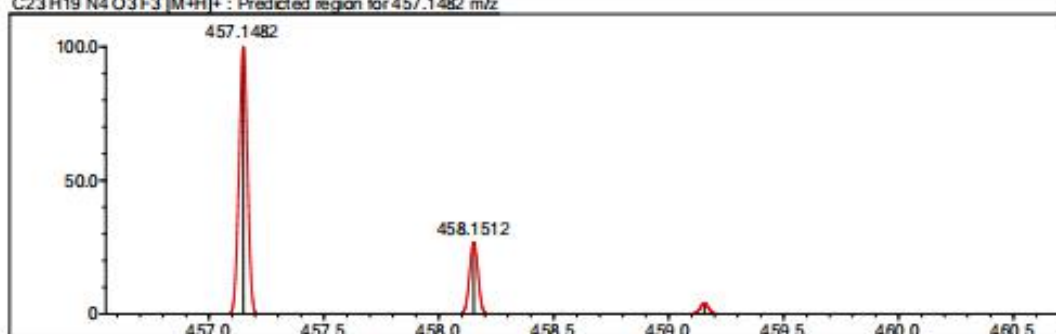

| Rank | Score | Formula (M)  | Ion                | Meas. m/z | Pred. m/z | Df. (mDa) | Df. (ppm) | Isot  | DBE  |
|------|-------|--------------|--------------------|-----------|-----------|-----------|-----------|-------|------|
| 5    | 76.78 | C23H19N4O3F3 | [M+H] <sup>+</sup> | 457.1496  | 457.1482  | 1.4       | 3.06      | 80.95 | 15.0 |

# HRMS spectrum of **11i**

| Elmt | Val | Min | Max | Use Adduct |
|------|-----|-----|-----|------|-----|-----|-----|------|-----|-----|-----|------|-----|-----|-----|------------|
| H    | 1   | 0   | 19  | O    | 2   | 0   | 4   | S    | 2   | 0   | 0   | Br   | 1   | 0   | 0   | H          |
| 2H   | 1   | 0   | 0   | 18O  | 2   | 0   | 0   | Cl   | 1   | 0   | 0   | Pd   | 2   | 0   | 0   |            |
| B    | 3   | 0   | 0   | F    | 1   | 0   | 3   | K    | 1   | 0   | 0   | I    | 3   | 0   | 0   |            |
| C    | 4   | 0   | 23  | Si   | 4   | 0   | 0   | Mn   | 3   | 0   | 0   | Pt   | 2   | 0   | 0   |            |
| N    | 3   | 0   | 4   | P    | 3   | 0   | 0   | Se   | 2   | 0   | 0   |      |     |     |     |            |

Error Margin (ppm): 100  
 HC Ratio: 0.0 - 10.0  
 Max Isotopes: all  
 MSn Iso RI (%): 75.00

DBE Range: not fixed  
 Apply N Rule: no  
 Isotope RI (%): 1.00  
 MSn Logic Mode: AND

Electron Ions: both  
 Use MSn Info: no  
 Isotope Res: 10000  
 Max Results: 100

Event#: 1 MS(E+) Ret. Time : 0.787 Scan#: 119

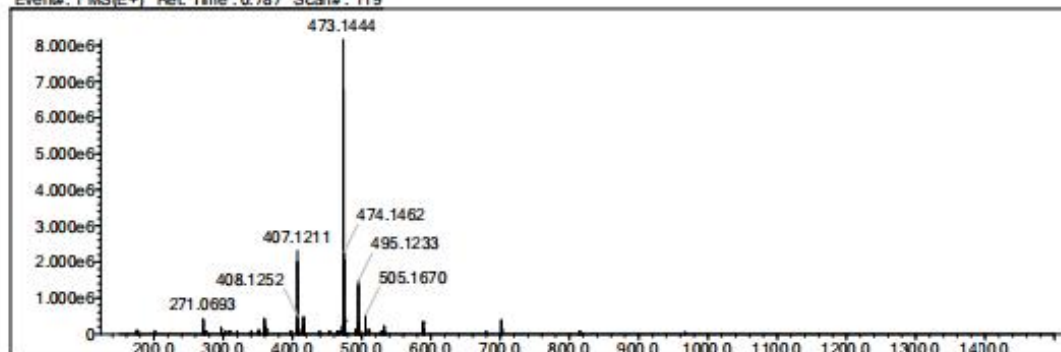

Measured region for 473.1444 m/z

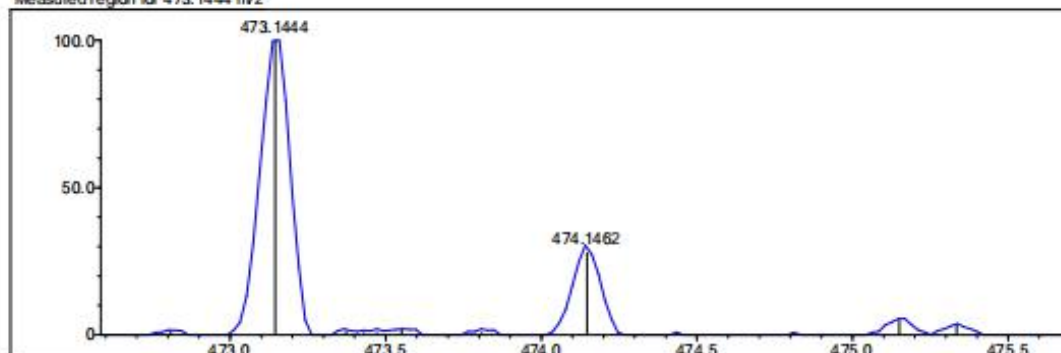

C23H19N4O4F3 [M+H]<sup>+</sup>: Predicted region for 473.1431 m/z

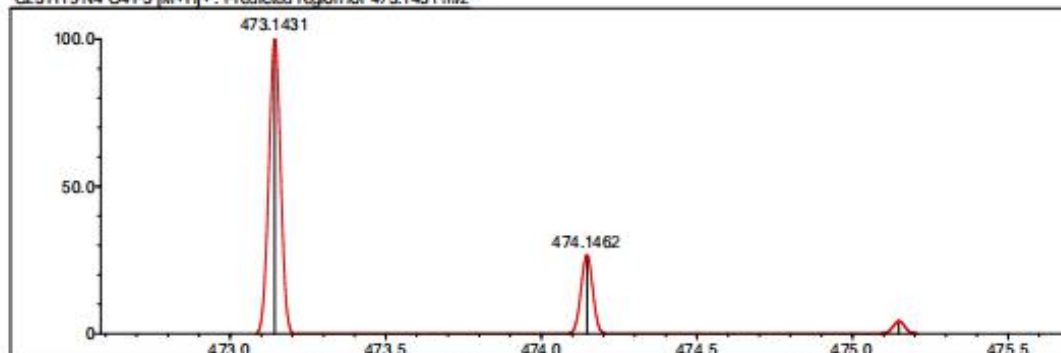

| Rank | Score | Formula (M)  | Ion                | Mass, m/z | Pred. m/z | Df. (mDa) | Df. (ppm) | Iso   | DBE  |
|------|-------|--------------|--------------------|-----------|-----------|-----------|-----------|-------|------|
| 1    | 73.86 | C23H19N4O4F3 | [M+H] <sup>+</sup> | 473.1444  | 473.1431  | 1.3       | 2.75      | 77.23 | 15.0 |

# HRMS spectrum of **11j**

| Elmt | Val. | Min | Max | Elmt | Val. | Min | Max | Elmt | Val. | Min | Max | Use Adduct |
|------|------|-----|-----|------|------|-----|-----|------|------|-----|-----|------------|
| H    | 1    | 0   | 25  | Al   | 3    | 0   | 0   | Zn   | 2    | 0   | 0   | K          |
| 2H   | 1    | 0   | 0   | Si   | 4    | 0   | 0   | Se   | 2    | 0   | 0   | H          |
| B    | 3    | 0   | 0   | P    | 3    | 0   | 0   | Br   | 1    | 0   | 0   | Na         |
| C    | 4    | 0   | 30  | S    | 2    | 0   | 0   | Ru   | 2    | 0   | 0   | NH4        |
| N    | 3    | 0   | 4   | Cl   | 1    | 0   | 1   | Sb   | 3    | 0   | 0   |            |
| O    | 2    | 0   | 4   | Fe   | 2    | 0   | 0   | I    | 3    | 0   | 0   |            |
| F    | 1    | 0   | 6   | Ni   | 2    | 0   | 0   | Ir   | 3    | 0   | 0   |            |
| Na   | 1    | 0   | 0   | Cu   | 2    | 0   | 0   | Pt   | 2    | 0   | 0   |            |

Error Margin (ppm): 100

HC Ratio: 0.0 - 100.0

Max Isotopes: all

MSn Iso RI (%): 75.00

DBE Range: -100.0 - 100.0

Apply N Rule: no

Isotope RI (%): 1.00

MSn Logic Mode: OR

Electron Ions: both

Use MSn Info: yes

Isotope Res: 10000

Max Results: 100

Event#: 1 MS(E+) Ret. Time: 1.027 Scan#: 155

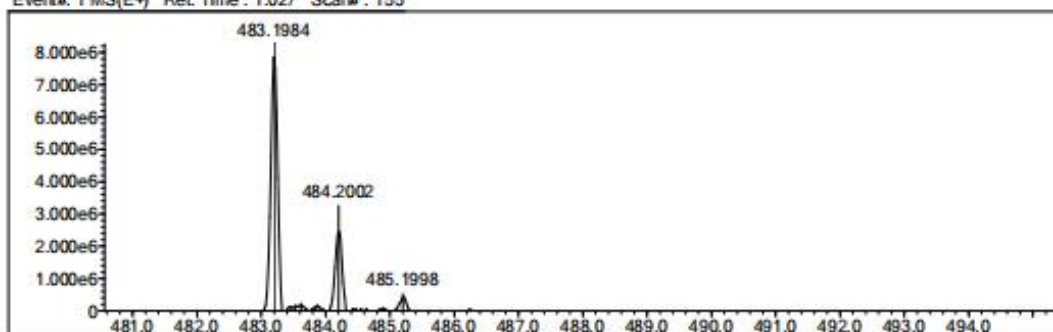

Measured region for 483.1984 m/z

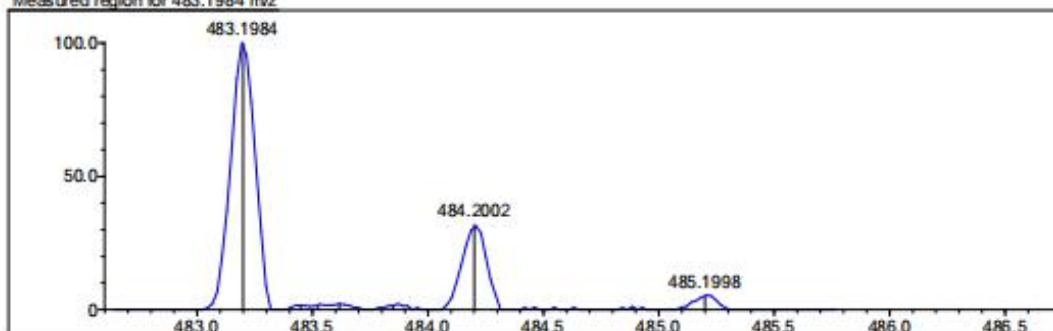

C26 H25 N4 O2 F3 [M+H]<sup>+</sup> : Predicted region for 483.2002 m/z

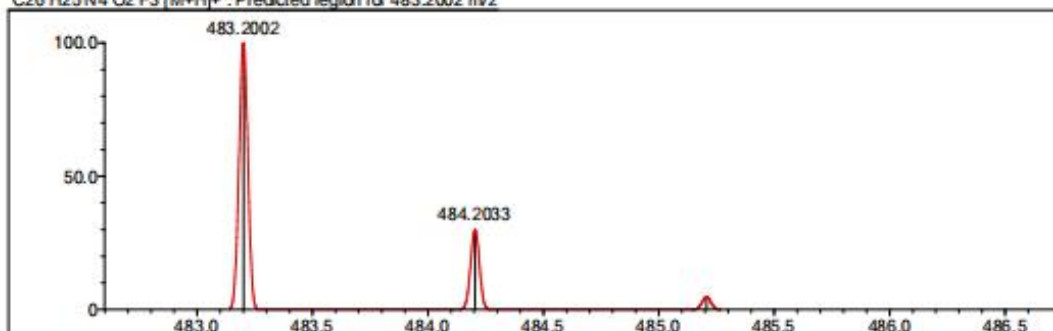

| Rank | Score | Formula (M)      | Ion                | Meas. m/z | Pred. m/z | Df. (mDa) | Df. (ppm) | Iso   | DBE  |
|------|-------|------------------|--------------------|-----------|-----------|-----------|-----------|-------|------|
| 1    | 74.26 | C26 H25 N4 O2 F3 | [M+H] <sup>+</sup> | 483.1984  | 483.2002  | -1.8      | -3.73     | 79.70 | 15.0 |



# HRMS spectrum of **11k**

| Elmt | Val. | Min | Max | Elmt | Val. | Min | Max | Elmt | Val. | Min | Max | Use Adduct |
|------|------|-----|-----|------|------|-----|-----|------|------|-----|-----|------------|
| H    | 1    | 0   | 25  | Al   | 3    | 0   | 0   | Zn   | 2    | 0   | 0   | K          |
| 2H   | 1    | 0   | 0   | Si   | 4    | 0   | 0   | Se   | 2    | 0   | 0   | H          |
| B    | 3    | 0   | 0   | P    | 3    | 0   | 0   | Br   | 1    | 0   | 0   | Na         |
| C    | 4    | 0   | 30  | S    | 2    | 0   | 0   | Ru   | 2    | 0   | 0   | NH4        |
| N    | 3    | 0   | 4   | Cl   | 1    | 0   | 0   | Sb   | 3    | 0   | 0   |            |
| O    | 2    | 0   | 4   | Fe   | 2    | 0   | 0   | I    | 3    | 0   | 0   |            |
| F    | 1    | 0   | 6   | Ni   | 2    | 0   | 0   | Ir   | 3    | 0   | 0   |            |
| Na   | 1    | 0   | 0   | Cu   | 2    | 0   | 0   | Pt   | 2    | 0   | 0   |            |

Error Margin (ppm): 100  
HC Ratio: 0.0 - 100.0  
Max Isotopes: all  
MSn Iso RI (%): 75.00

DBE Range: -100.0 - 100.0  
Apply N Rule: no  
Isotope RI (%): 1.00  
MSn Logic Mode: OR

Electron Ions: both  
Use MSn Info: yes  
Isotope Res: 10000  
Max Results: 100

Event#: 1 MS(E+) Ret. Time : 0.787 Scan#: 119

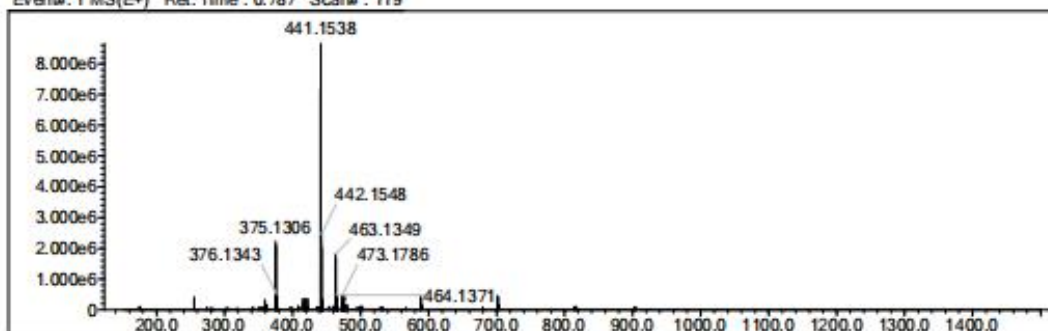

Measured region for 441.1538 m/z

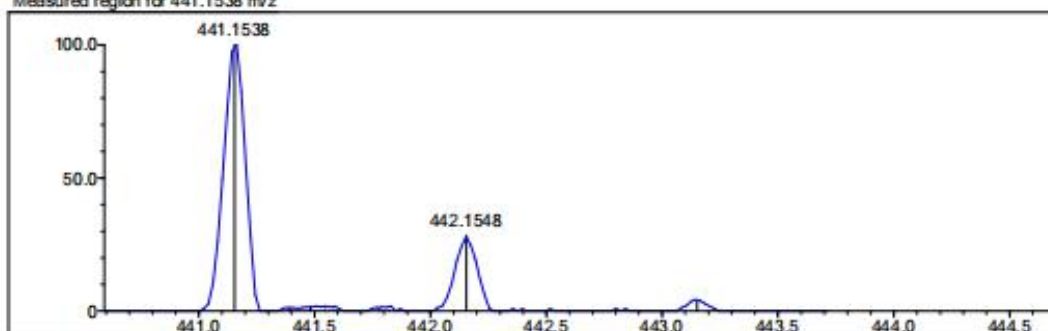

C23 H19 N4 O2 F3 [M+H]<sup>+</sup> : Predicted region for 441.1533 m/z

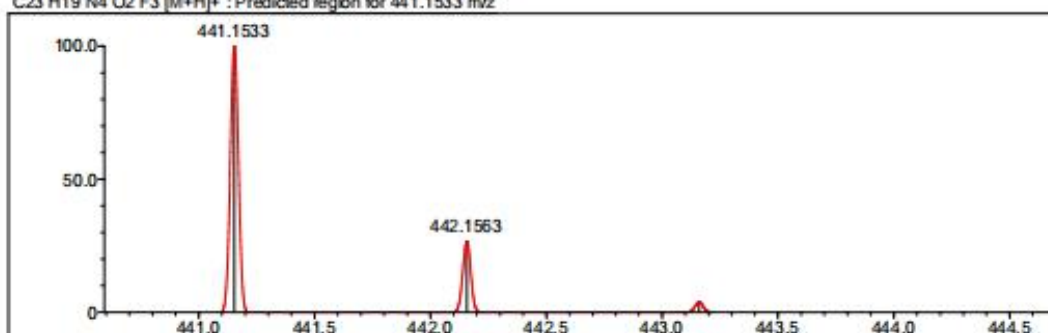

| Rank | Score | Formula (M)      | Ion                | Mass. m/z | Pred. m/z | Df. (mDa) | Df. (ppm) | Isot  | DBE  |
|------|-------|------------------|--------------------|-----------|-----------|-----------|-----------|-------|------|
| 2    | 77.55 | C23 H19 N4 O2 F3 | [M+H] <sup>+</sup> | 441.1538  | 441.1533  | 0.5       | 1.13      | 77.80 | 15.0 |

# HRMS spectrum of **111**

| Elmt | Val. | Min | Max | Elmt | Val. | Min | Max | Elmt | Val. | Min | Max | Use Adduct |
|------|------|-----|-----|------|------|-----|-----|------|------|-----|-----|------------|
| H    | 1    | 0   | 25  | Al   | 3    | 0   | 0   | Zn   | 2    | 0   | 0   | K          |
| 2H   | 1    | 0   | 0   | Si   | 4    | 0   | 0   | Se   | 2    | 0   | 0   | H          |
| B    | 3    | 0   | 0   | P    | 3    | 0   | 0   | Br   | 1    | 0   | 0   | Na         |
| C    | 4    | 0   | 30  | S    | 2    | 0   | 0   | Ru   | 2    | 0   | 0   | NH4        |
| N    | 3    | 0   | 4   | Cl   | 1    | 0   | 0   | Sb   | 3    | 0   | 0   |            |
| O    | 2    | 0   | 4   | Fe   | 2    | 0   | 0   | I    | 3    | 0   | 0   |            |
| F    | 1    | 0   | 6   | Ni   | 2    | 0   | 0   | Ir   | 3    | 0   | 0   |            |
| Na   | 1    | 0   | 0   | Cu   | 2    | 0   | 0   | Pt   | 2    | 0   | 0   |            |

Error Margin (ppm): 100  
 HC Ratio: 0.0 - 100.0  
 Max Isotopes: all  
 MSn Iso RI (%): 75.00

DBE Range: -100.0 - 100.0  
 Apply N Rule: no  
 Isotope RI (%): 1.00  
 MSn Logic Mode: OR

Electron Ions: both  
 Use MSn Info: yes  
 Isotope Res: 10000  
 Max Results: 100

Event#: 1 MS(E+) Ret. Time : 0.907 Scan#: 137

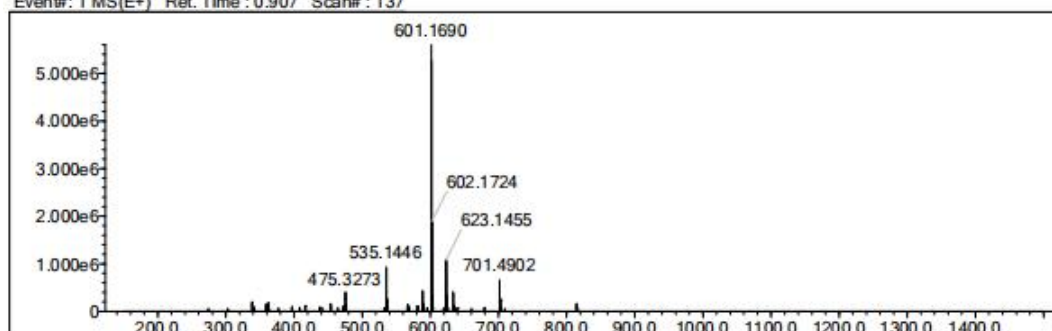

Measured region for 601.1690 m/z

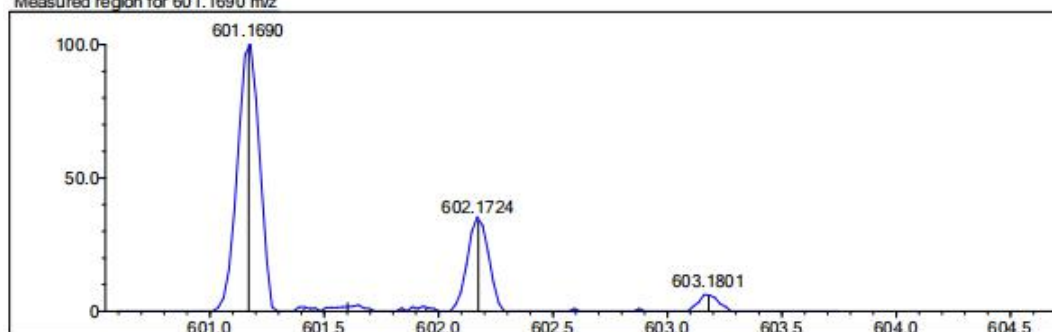

C30 H22 N4 O3 F6 [M+H]<sup>+</sup> : Predicted region for 601.1669 m/z

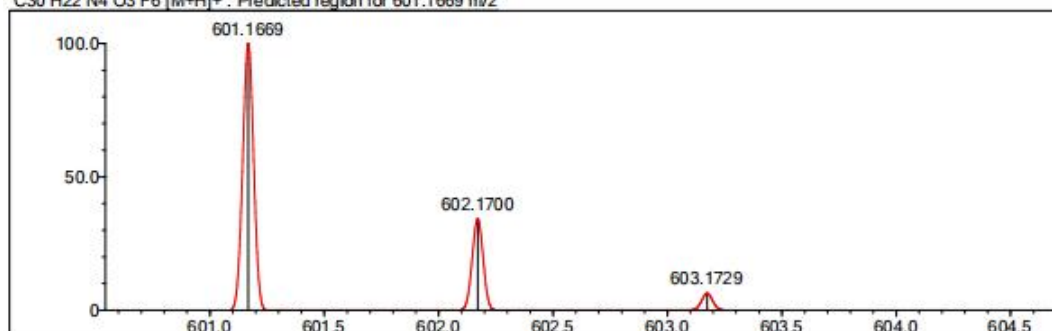

| Rank | Score | Formula (M)      | Ion                | Meas. m/z | Pred. m/z | Df. (mDa) | Df. (ppm) | Iso   | DBE  |
|------|-------|------------------|--------------------|-----------|-----------|-----------|-----------|-------|------|
| 1    | 88.53 | C30 H22 N4 O3 F6 | [M+H] <sup>+</sup> | 601.1690  | 601.1669  | 2.1       | 3.49      | 94.41 | 19.0 |

# HRMS spectrum of **11m**

| Elmt | Val. | Min | Max | Elmt | Val. | Min | Max | Elmt | Val. | Min | Max | Use Adduct |
|------|------|-----|-----|------|------|-----|-----|------|------|-----|-----|------------|
| H    | 1    | 0   | 25  | Al   | 3    | 0   | 0   | Zn   | 2    | 0   | 0   | K          |
| 2H   | 1    | 0   | 0   | Si   | 4    | 0   | 0   | Se   | 2    | 0   | 0   | H          |
| B    | 3    | 0   | 0   | P    | 3    | 0   | 0   | Br   | 1    | 0   | 0   | Na         |
| C    | 4    | 0   | 30  | S    | 2    | 0   | 0   | Ru   | 2    | 0   | 0   | NH4        |
| N    | 3    | 0   | 4   | Cl   | 1    | 0   | 1   | Sb   | 3    | 0   | 0   |            |
| O    | 2    | 0   | 4   | Fe   | 2    | 0   | 0   | I    | 3    | 0   | 0   |            |
| F    | 1    | 0   | 6   | Ni   | 2    | 0   | 0   | Ir   | 3    | 0   | 0   |            |
| Na   | 1    | 0   | 0   | Cu   | 2    | 0   | 0   | Pt   | 2    | 0   | 0   |            |

Error Margin (ppm): 100  
 HC Ratio: 0.0 - 100.0  
 Max Isotopes: all  
 MSn Iso RI (%): 75.00

DBE Range: -100.0 - 100.0  
 Apply N Rule: no  
 Isotope RI (%): 1.00  
 MSn Logic Mode: OR

Electron Ions: both  
 Use MSn Info: yes  
 Isotope Res: 10000  
 Max Results: 100

Event#: 1 MS(E+) Ret. Time : 0.773 Scan#: 117

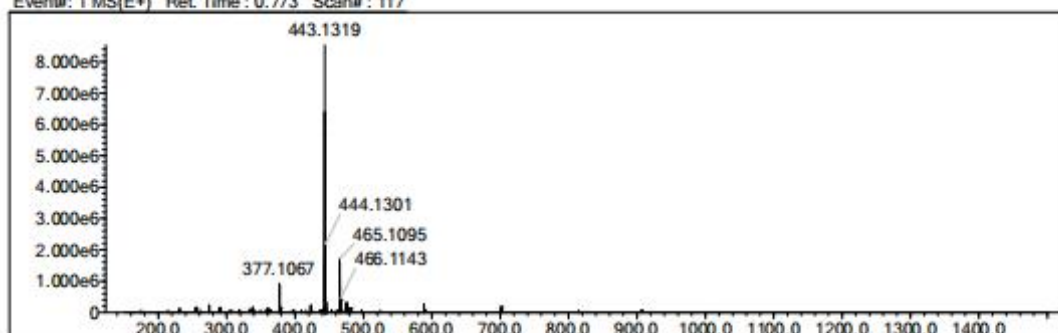

Measured region for 443.1319 m/z

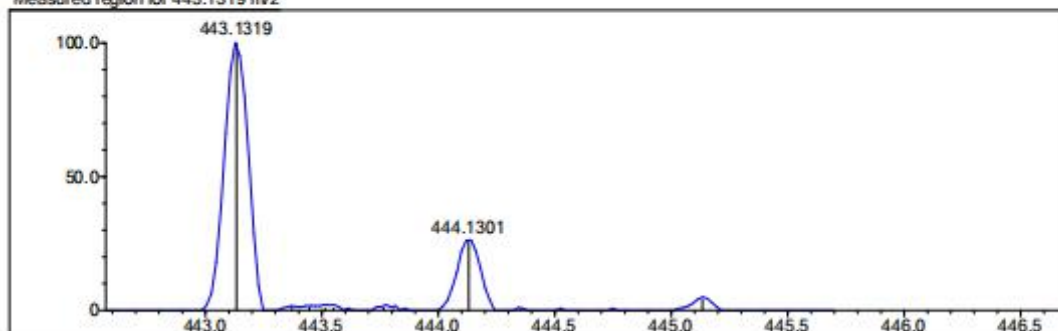

C22 H17 N4 O3 F3 [M+H]<sup>+</sup> : Predicted region for 443.1326 m/z

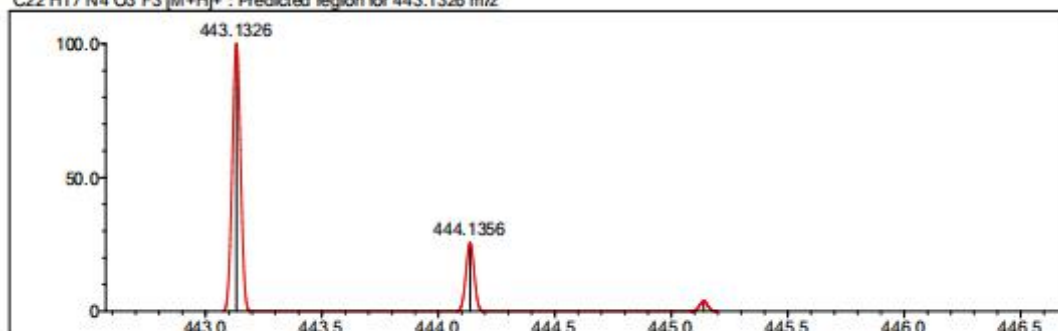

| Rank | Score | Formula (M)      | Ion                | Meas. m/z | Pred. m/z | Df. (mDa) | Df. (ppm) | Iso   | DBE  |
|------|-------|------------------|--------------------|-----------|-----------|-----------|-----------|-------|------|
| 11   | 70.76 | C22 H17 N4 O3 F3 | [M+H] <sup>+</sup> | 443.1319  | 443.1326  | -0.7      | -1.58     | 71.80 | 15.0 |

# HRMS spectrum of **11n**

| Elmt | Val | Min | Max | Elmt | Val | Min | Max | Elmt | Val | Min | Max | Use Adduct |
|------|-----|-----|-----|------|-----|-----|-----|------|-----|-----|-----|------------|
| H    | 1   | 0   | 25  | Al   | 3   | 0   | 0   | Zn   | 2   | 0   | 0   | K          |
| 2H   | 1   | 0   | 0   | Si   | 4   | 0   | 0   | Se   | 2   | 0   | 0   | H          |
| B    | 3   | 0   | 0   | P    | 3   | 0   | 0   | Br   | 1   | 0   | 0   | Na         |
| C    | 4   | 0   | 30  | S    | 2   | 0   | 0   | Ru   | 2   | 0   | 0   | NH4        |
| N    | 3   | 0   | 4   | Cl   | 1   | 0   | 0   | Sb   | 3   | 0   | 0   |            |
| O    | 2   | 0   | 4   | Fe   | 2   | 0   | 0   | I    | 3   | 0   | 0   |            |
| F    | 1   | 0   | 6   | Ni   | 2   | 0   | 0   | Ir   | 3   | 0   | 0   |            |
| Na   | 1   | 0   | 0   | Cu   | 2   | 0   | 0   | Pt   | 2   | 0   | 0   |            |

Error Margin (ppm): 100  
HC Ratio: 0.0 - 100.0  
Max Isotopes: all  
MSn Iso RI (%): 75.00

DBE Range: -100.0 - 100.0  
Apply N Rule: no  
Isotope RI (%): 1.00  
MSn Logic Mode: OR

Electron Ions: both  
Use MSn Info: yes  
Isotope Res: 10000  
Max Results: 100

Event#: 1 MS(E+) Ret. Time: 0.800 Scan#: 121

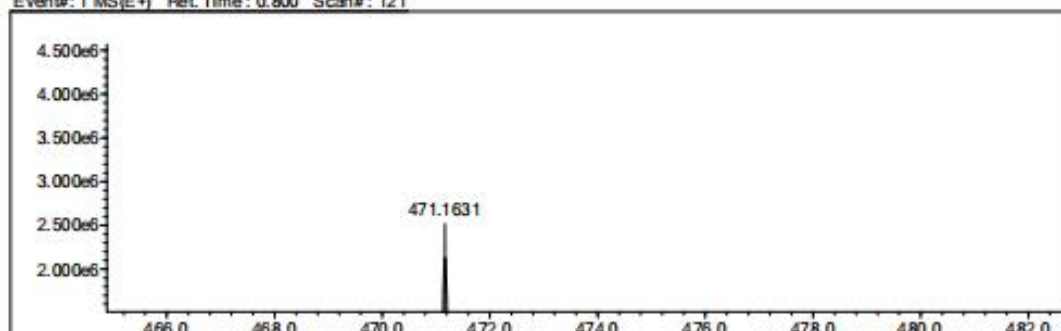

Measured region for 471.1631 m/z

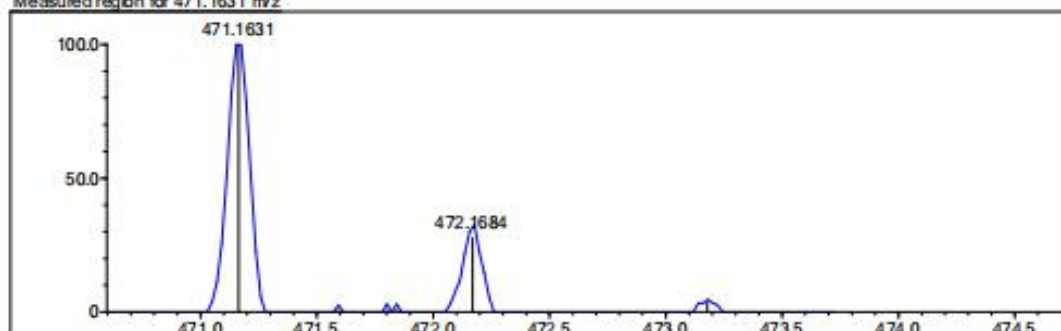

C24H21N4O3F3 [M+H]<sup>+</sup> : Predicted region for 471.1639 m/z

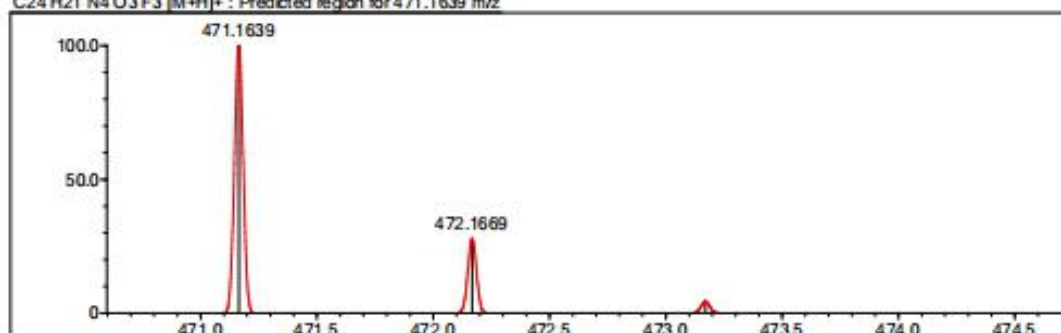

| Rank | Score | Formula (M)  | Ion                | Mass, m/z | Pred. m/z | Df. (mDa) | Df. (ppm) | Isotope | DBE  |
|------|-------|--------------|--------------------|-----------|-----------|-----------|-----------|---------|------|
| 4    | 90.05 | C24H21N4O3F3 | [M+H] <sup>+</sup> | 471.1631  | 471.1639  | -0.8      | +1.70     | 91.66   | 15.0 |

# HRMS spectrum of **11o**

| Elmt | Val. | Min | Max | Elmt | Val. | Min | Max | Elmt | Val. | Min | Max | Use Adduct |
|------|------|-----|-----|------|------|-----|-----|------|------|-----|-----|------------|
| H    | 1    | 0   | 25  | Al   | 3    | 0   | 0   | Zn   | 2    | 0   | 0   | K          |
| 2H   | 1    | 0   | 0   | Si   | 4    | 0   | 0   | Se   | 2    | 0   | 0   | H          |
| B    | 3    | 0   | 0   | P    | 3    | 0   | 0   | Br   | 1    | 0   | 0   | Na         |
| C    | 4    | 0   | 30  | S    | 2    | 0   | 0   | Ru   | 2    | 0   | 0   | NH4        |
| N    | 3    | 0   | 4   | Cl   | 1    | 0   | 0   | Sb   | 3    | 0   | 0   |            |
| O    | 2    | 0   | 4   | Fe   | 2    | 0   | 0   | I    | 3    | 0   | 0   |            |
| F    | 1    | 0   | 6   | Ni   | 2    | 0   | 0   | Ir   | 3    | 0   | 0   |            |
| Na   | 1    | 0   | 0   | Cu   | 2    | 0   | 0   | Pt   | 2    | 0   | 0   |            |

Error Margin (ppm): 100

HC Ratio: 0.0 - 100.0

Max Isotopes: all

MSn Iso RI (%): 75.00

DBE Range: -100.0 - 100.0

Apply N Rule: no

Isotope RI (%): 1.00

MSn Logic Mode: OR

Electron Ions: both

Use MSn Info: yes

Isotope Res: 10000

Max Results: 100

Event#: 1 MS(E+) Ret. Time : 0.853 Scan#: 129

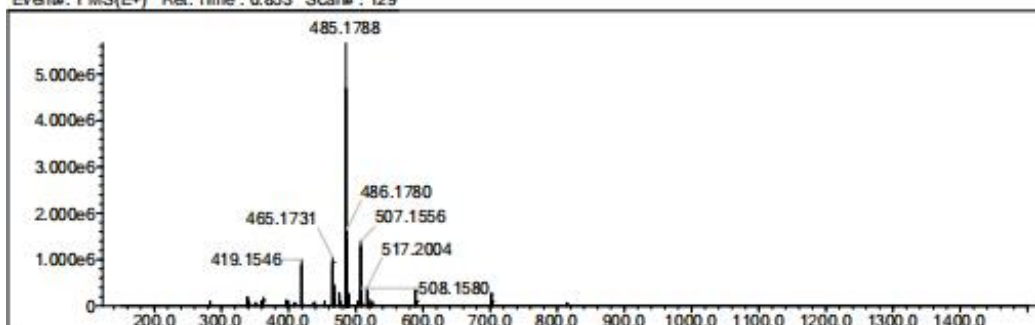

Measured region for 485.1788 m/z

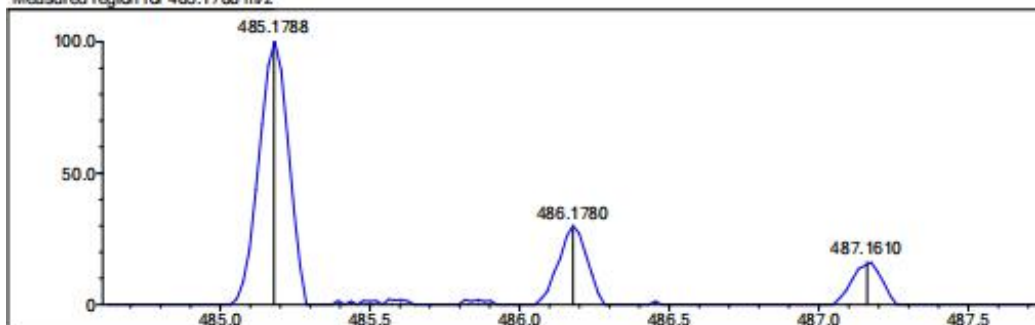

C25 H23 N4 O3 F3 [M+H]<sup>+</sup> : Predicted region for 485.1795 m/z

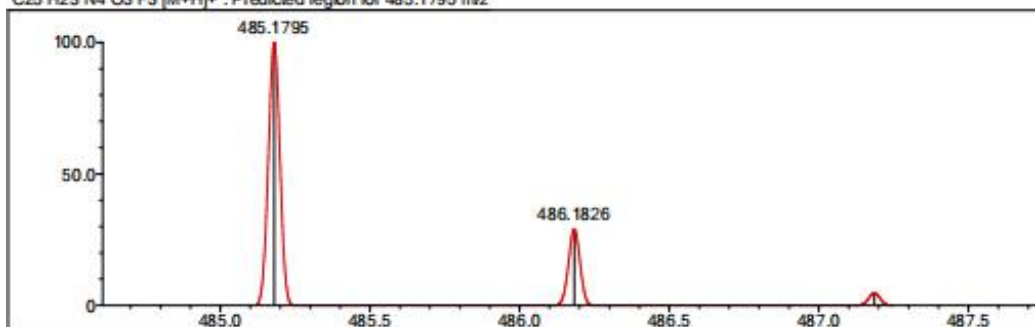

| Rank | Score | Formula (M)      | Ion                | Mass. m/z | Pred. m/z | Df. (mDa) | Df. (ppm) | Iso   | DBE  |
|------|-------|------------------|--------------------|-----------|-----------|-----------|-----------|-------|------|
| 7    | 36.95 | C25 H23 N4 O3 F3 | [M+H] <sup>+</sup> | 485.1788  | 485.1795  | -0.7      | -1.44     | 37.37 | 15.0 |



# HRMS spectrum of **11p**

| Elmt | Val. | Min | Max | Elmt | Val. | Min | Max | Elmt | Val. | Min | Max | Use Adduct |
|------|------|-----|-----|------|------|-----|-----|------|------|-----|-----|------------|
| H    | 1    | 0   | 25  | Al   | 3    | 0   | 0   | Zn   | 2    | 0   | 0   | K          |
| 2H   | 1    | 0   | 0   | Si   | 4    | 0   | 0   | Se   | 2    | 0   | 0   | H          |
| B    | 3    | 0   | 0   | P    | 3    | 0   | 0   | Br   | 1    | 0   | 0   | Na         |
| C    | 4    | 0   | 30  | S    | 2    | 0   | 0   | Ru   | 2    | 0   | 0   | NH4        |
| N    | 3    | 0   | 4   | Cl   | 1    | 0   | 0   | Sb   | 3    | 0   | 0   |            |
| O    | 2    | 0   | 4   | Fe   | 2    | 0   | 0   | I    | 3    | 0   | 0   |            |
| F    | 1    | 0   | 6   | Ni   | 2    | 0   | 0   | Ir   | 3    | 0   | 0   |            |
| Na   | 1    | 0   | 0   | Cu   | 2    | 0   | 0   | Pt   | 2    | 0   | 0   |            |

Error Margin (ppm): 100  
 HC Ratio: 0.0 - 100.0  
 Max Isotopes: all  
 MSn Iso RI (%): 75.00

DBE Range: -100.0 - 100.0  
 Apply N Rule: no  
 Isotope RI (%): 1.00  
 MSn Logic Mode: OR

Electron Ions: both  
 Use MSn Info: yes  
 Isotope Res: 10000  
 Max Results: 100

Event#: 1 MS(E+) Ret. Time : 0.813 Scan#: 123

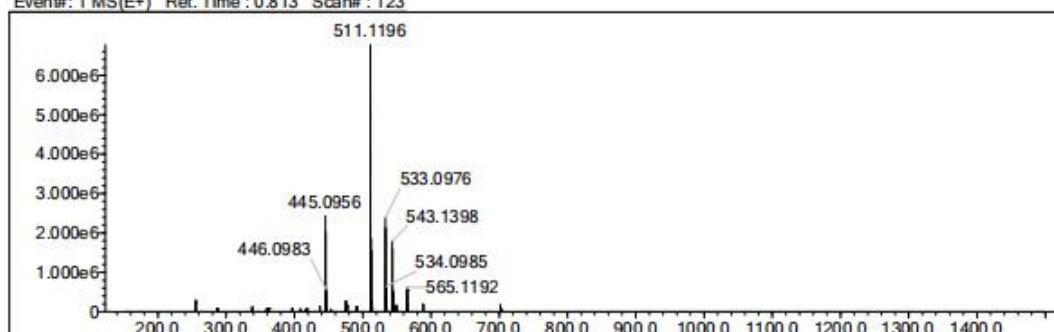

Measured region for 511.1196 m/z

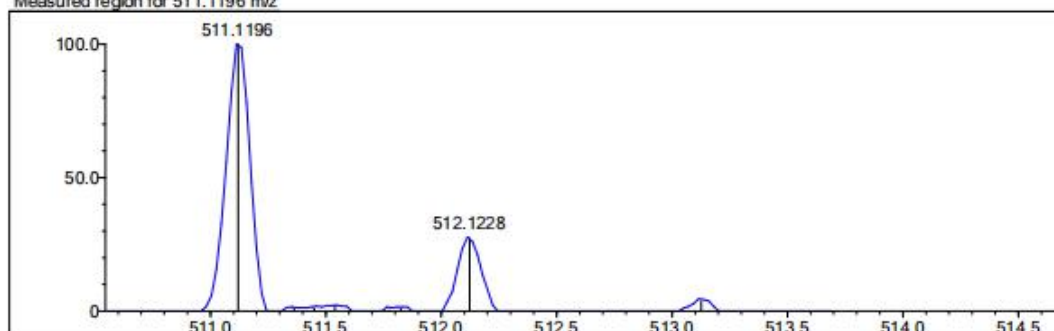

C23 H16 N4 O3 F6 [M+H]<sup>+</sup> : Predicted region for 511.1199 m/z

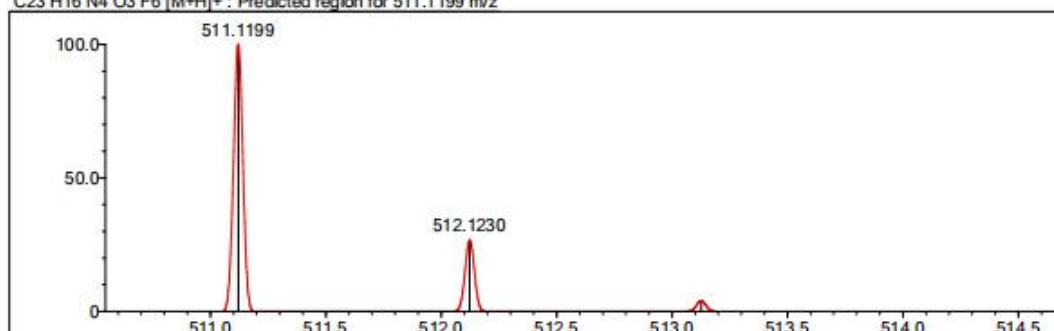

| Rank | Score | Formula (M)      | Ion                | Meas. m/z | Pred. m/z | Df. (mDe) | Df. (ppm) | Iso   | DBE  |
|------|-------|------------------|--------------------|-----------|-----------|-----------|-----------|-------|------|
| 1    | 85.65 | C23 H16 N4 O3 F6 | [M+H] <sup>+</sup> | 511.1196  | 511.1199  | -0.3      | -0.59     | 85.65 | 15.0 |

# HRMS spectrum of **11q**

| Elmt | Val. | Min | Max | Elmt | Val. | Min | Max | Elmt | Val. | Min | Max | Use Adduct |
|------|------|-----|-----|------|------|-----|-----|------|------|-----|-----|------------|
| H    | 1    | 0   | 25  | Al   | 3    | 0   | 0   | Zn   | 2    | 0   | 0   | K          |
| 2H   | 1    | 0   | 0   | Si   | 4    | 0   | 0   | Se   | 2    | 0   | 0   | H          |
| B    | 3    | 0   | 0   | P    | 3    | 0   | 0   | Br   | 1    | 0   | 0   | Na         |
| C    | 4    | 0   | 30  | S    | 2    | 0   | 0   | Ru   | 2    | 0   | 0   | NH4        |
| N    | 3    | 0   | 4   | Cl   | 1    | 0   | 0   | Sb   | 3    | 0   | 0   |            |
| O    | 2    | 0   | 4   | Fe   | 2    | 0   | 0   | I    | 3    | 0   | 0   |            |
| F    | 1    | 0   | 6   | Ni   | 2    | 0   | 0   | Ir   | 3    | 0   | 0   |            |
| Na   | 1    | 0   | 0   | Cu   | 2    | 0   | 0   | Pt   | 2    | 0   | 0   |            |

Error Margin (ppm): 100  
 HC Ratio: 0.0 - 100.0  
 Max Isotopes: all  
 MSn Iso RI (%): 75.00

DBE Range: -100.0 - 100.0  
 Apply N Rule: no  
 Isotope RI (%): 1.00  
 MSn Logic Mode: OR

Electron Ions: both  
 Use MSn Info: yes  
 Isotope Res: 10000  
 Max Results: 100

Event#: 1 MS(E+) Ret. Time : 0.813 Scan#: 123

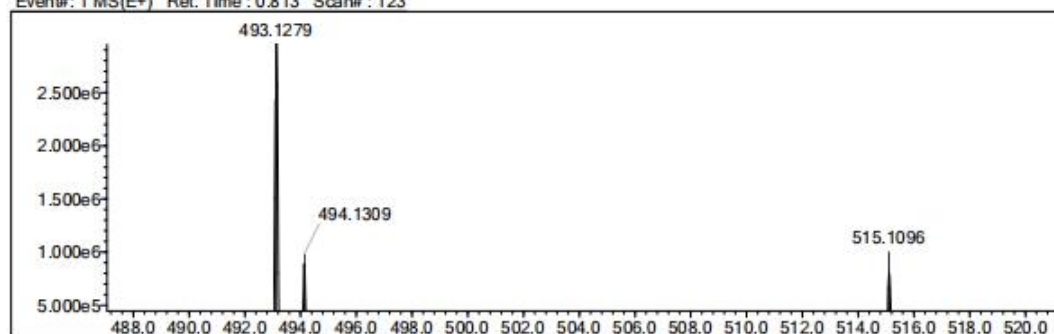

Measured region for 493.1279 m/z

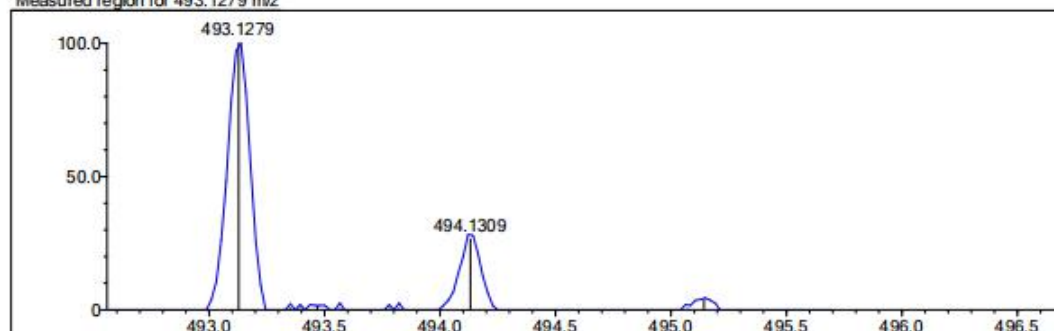

C23 H17 N4 O3 F5 [M+H]<sup>+</sup> : Predicted region for 493.1294 m/z

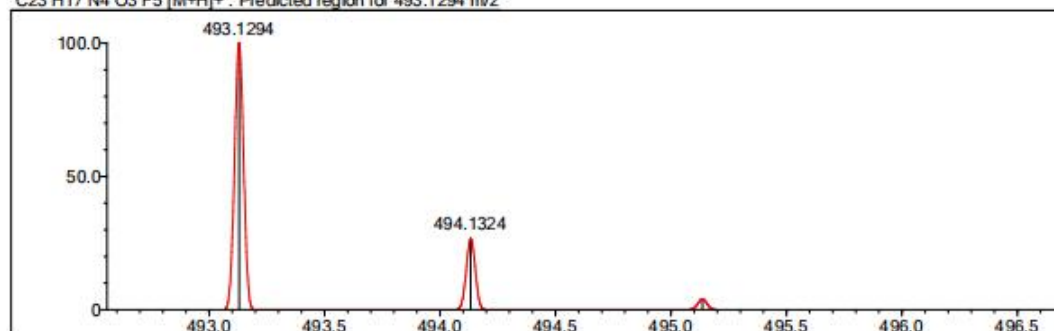

| Rank | Score | Formula (M)      | Ion                | Meas. m/z | Pred. m/z | Df. (mDa) | Df. (ppm) | Iso   | DBE  |
|------|-------|------------------|--------------------|-----------|-----------|-----------|-----------|-------|------|
| 9    | 76.87 | C23 H17 N4 O3 F5 | [M+H] <sup>+</sup> | 493.1279  | 493.1294  | -1.5      | -3.04     | 81.00 | 15.0 |

# HRMS spectrum of **11r**

| Elmt | Val. | Min | Max | Elmt | Val. | Min | Max | Elmt | Val. | Min | Max | Use Adduct |
|------|------|-----|-----|------|------|-----|-----|------|------|-----|-----|------------|
| H    | 1    | 0   | 23  | Al   | 3    | 0   | 0   | Zn   | 2    | 0   | 0   | K          |
| 2H   | 1    | 0   | 0   | Si   | 4    | 0   | 0   | Se   | 2    | 0   | 0   | H          |
| B    | 3    | 0   | 0   | P    | 3    | 0   | 0   | Br   | 1    | 0   | 0   | Na         |
| C    | 4    | 0   | 25  | S    | 2    | 0   | 0   | Ru   | 2    | 0   | 0   | NH4        |
| N    | 3    | 0   | 5   | Cl   | 1    | 0   | 0   | Sb   | 3    | 0   | 0   |            |
| O    | 2    | 0   | 5   | Fe   | 2    | 0   | 0   | I    | 3    | 0   | 0   |            |
| F    | 1    | 0   | 3   | Ni   | 2    | 0   | 0   | Ir   | 3    | 0   | 0   |            |
| Na   | 1    | 0   | 0   | Cu   | 2    | 0   | 0   | Pt   | 2    | 0   | 0   |            |

Error Margin (ppm): 100  
 HC Ratio: 0.0 - 100.0  
 Max Isotopes: all  
 MSn Iso RI (%): 75.00

DBE Range: -100.0 - 100.0  
 Apply N Rule: no  
 Isotope RI (%): 1.00  
 MSn Logic Mode: OR

Electron Ions: both  
 Use MSn Info: yes  
 Isotope Res: 10000  
 Max Results: 100

Event#: 1 MS(E+) Ret. Time: 0.827 Scan#: 125

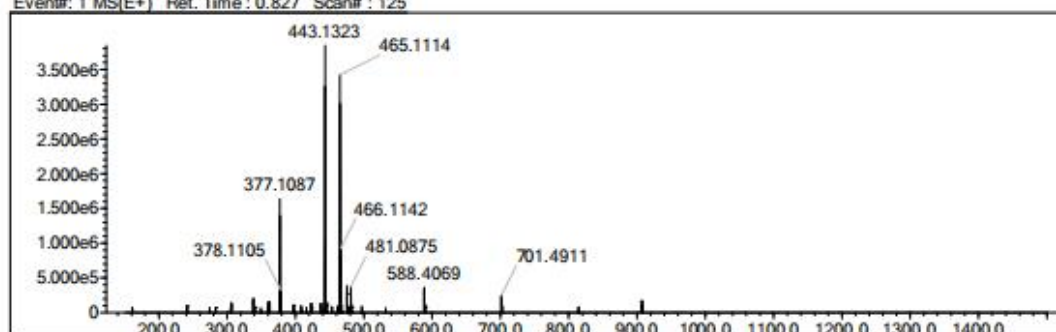

Measured region for 443.1323 m/z

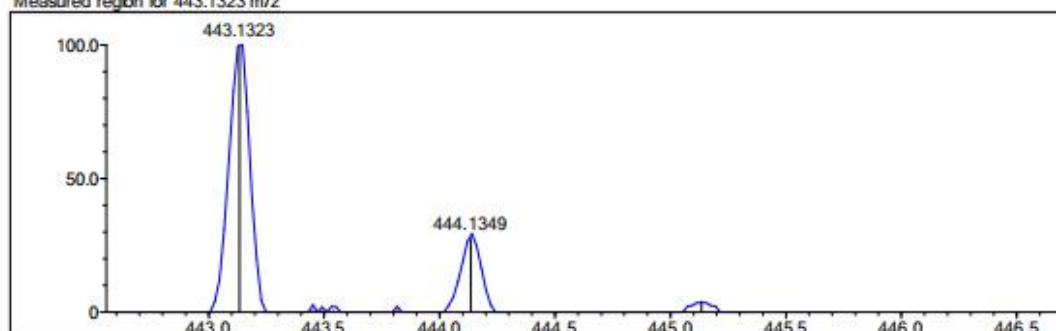

C22 H17 N4 O3 F3 [M+H]<sup>+</sup> : Predicted region for 443.1326 m/z

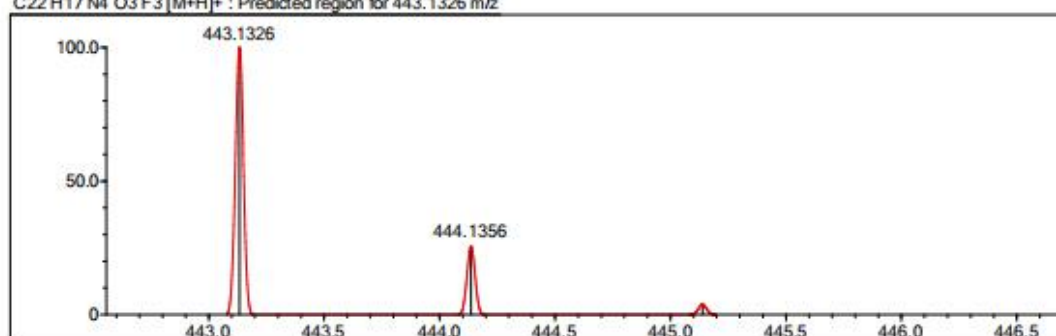

| Rank | Score | Formula (M)      | Ion                | Meas. m/z | Pred. m/z | Df. (mDa) | Df. (ppm) | Iso   | DBE  |
|------|-------|------------------|--------------------|-----------|-----------|-----------|-----------|-------|------|
| 7    | 72.53 | C22 H17 N4 O3 F3 | [M+H] <sup>+</sup> | 443.1323  | 443.1326  | -0.3      | -0.68     | 72.53 | 15.0 |



# HRMS spectrum of **11s**

| Elmt | Val. | Min | Max | Elmt | Val. | Min | Max | Elmt | Val. | Min | Max | Use Adduct |
|------|------|-----|-----|------|------|-----|-----|------|------|-----|-----|------------|
| H    | 1    | 0   | 21  | Al   | 3    | 0   | 0   | Zn   | 2    | 0   | 0   | K          |
| 2H   | 1    | 0   | 0   | Si   | 4    | 0   | 0   | Se   | 2    | 0   | 0   | H          |
| B    | 3    | 0   | 0   | P    | 3    | 0   | 0   | Br   | 1    | 0   | 0   | Na         |
| C    | 4    | 0   | 28  | S    | 2    | 0   | 0   | Ru   | 2    | 0   | 0   | NH4        |
| N    | 3    | 0   | 4   | Cl   | 1    | 0   | 0   | Sb   | 3    | 0   | 0   |            |
| O    | 2    | 0   | 4   | Fe   | 2    | 0   | 0   | I    | 3    | 0   | 0   |            |
| F    | 1    | 0   | 3   | Ni   | 2    | 0   | 0   | Ir   | 3    | 0   | 0   |            |
| Na   | 1    | 0   | 0   | Cu   | 2    | 0   | 0   | Pt   | 2    | 0   | 0   |            |

Error Margin (ppm): 100  
 HC Ratio: 0.0 - 100.0  
 Max Isotopes: all  
 MSn Iso RI (%): 75.00

DBE Range: -100.0 - 100.0  
 Apply N Rule: no  
 Isotope RI (%): 1.00  
 MSn Logic Mode: OR

Electron Ions: both  
 Use MSn Info: yes  
 Isotope Res: 10000  
 Max Results: 100

Event#: 1 MS(E+) Ret. Time : 0.853 Scan#: 129

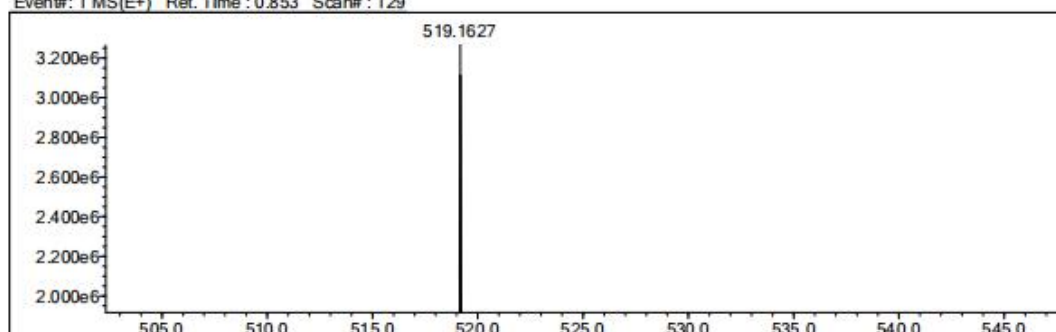

Measured region for 519.1627 m/z

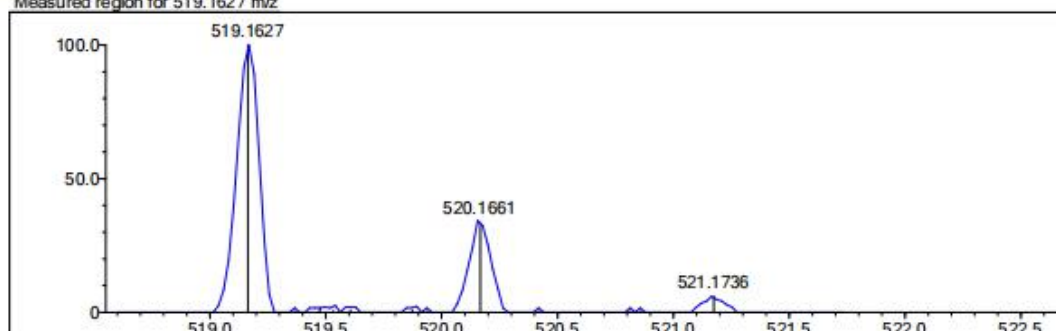

C28 H21 N4 O3 F3 [M+H]<sup>+</sup> : Predicted region for 519.1639 m/z

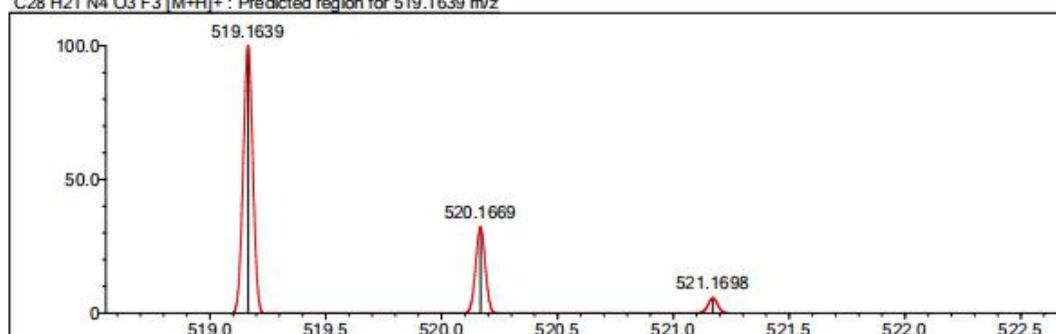

| Rank | Score | Formula (M)      | Ion                | Mess. m/z | Pred. m/z | Df. (mDa) | Df. (ppm) | Iso   | DBE  |
|------|-------|------------------|--------------------|-----------|-----------|-----------|-----------|-------|------|
| 1    | 87.88 | C28 H21 N4 O3 F3 | [M+H] <sup>+</sup> | 519.1627  | 519.1639  | -1.2      | -2.31     | 90.85 | 19.0 |

# HRMS spectrum of **11t**

| Elmt | Val. | Min | Max | Elmt | Val. | Min | Max | Elmt | Val. | Min | Max | Use Adduct |
|------|------|-----|-----|------|------|-----|-----|------|------|-----|-----|------------|
| H    | 1    | 0   | 25  | Al   | 3    | 0   | 0   | Zn   | 2    | 0   | 0   | K          |
| 2H   | 1    | 0   | 0   | Si   | 4    | 0   | 0   | Se   | 2    | 0   | 0   | H          |
| B    | 3    | 0   | 0   | P    | 3    | 0   | 0   | Br   | 1    | 0   | 0   | Na         |
| C    | 4    | 0   | 30  | S    | 2    | 0   | 0   | Ru   | 2    | 0   | 0   | NH4        |
| N    | 3    | 0   | 4   | Cl   | 1    | 0   | 1   | Sb   | 3    | 0   | 0   |            |
| O    | 2    | 0   | 4   | Fe   | 2    | 0   | 0   | I    | 3    | 0   | 0   |            |
| F    | 1    | 0   | 6   | Ni   | 2    | 0   | 0   | Ir   | 3    | 0   | 0   |            |
| Na   | 1    | 0   | 0   | Cu   | 2    | 0   | 0   | Pt   | 2    | 0   | 0   |            |

Error Margin (ppm): 100  
 HC Ratio: 0.0 - 100.0  
 Max Isotopes: all  
 MSn Iso RI (%): 75.00

DBE Range: -100.0 - 100.0  
 Apply N Rule: no  
 Isotope RI (%): 1.00  
 MSn Logic Mode: OR

Electron Ions: both  
 Use MSn Info: yes  
 Isotope Res: 10000  
 Max Results: 100

Event#: 1 MS(E+) Ret. Time : 0.933 Scan#: 141

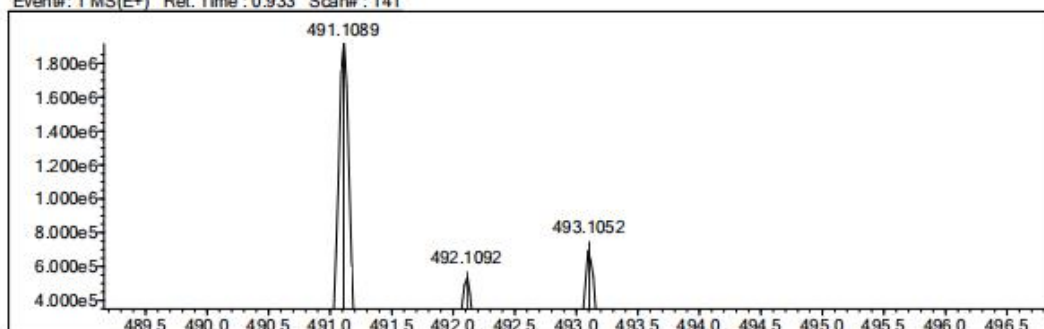

Measured region for 491.1089 m/z

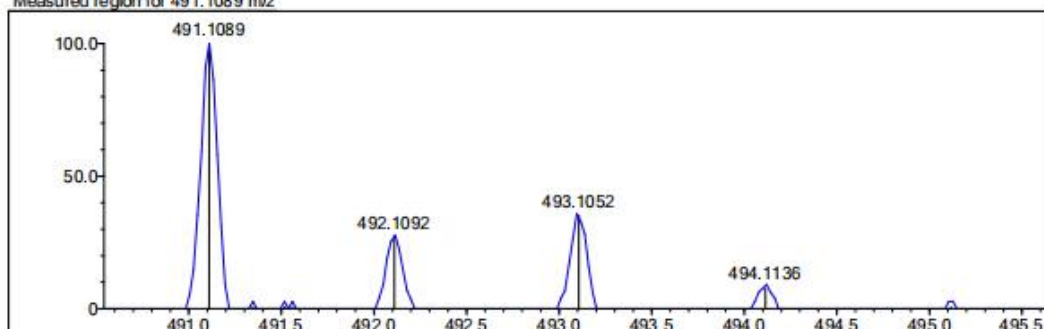

C23 H18 N4 O3 F3 Cl [M+H]<sup>+</sup>: Predicted region for 491.1092 m/z

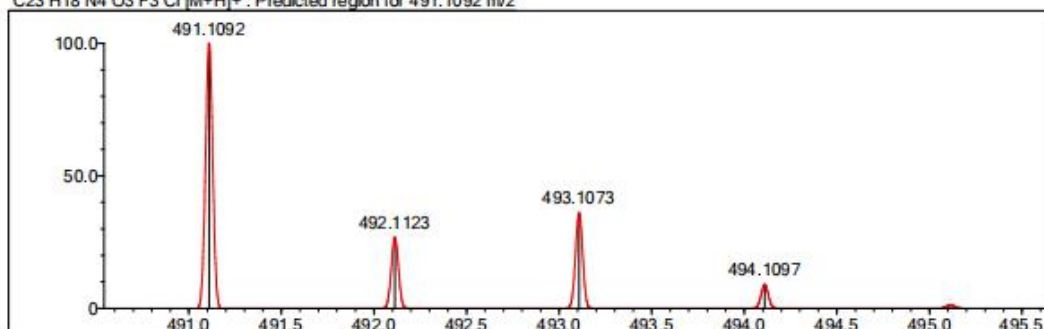

| Rank | Score | Formula (M)         | Ion                | Meas. m/z | Pred. m/z | Df. (mDa) | Df. (ppm) | Iso   | DBE  |
|------|-------|---------------------|--------------------|-----------|-----------|-----------|-----------|-------|------|
| 1    | 94.98 | C23 H18 N4 O3 F3 Cl | [M+H] <sup>+</sup> | 491.1089  | 491.1092  | -0.3      | -0.61     | 94.98 | 15.0 |

# HRMS spectrum of 16

| Elmt | Val. | Min | Max | Elmt | Val. | Min | Max | Elmt | Val. | Min | Max | Use Adduct |
|------|------|-----|-----|------|------|-----|-----|------|------|-----|-----|------------|
| H    | 1    | 0   | 23  | Al   | 3    | 0   | 0   | Zn   | 2    | 0   | 0   | K          |
| 2H   | 1    | 0   | 0   | Si   | 4    | 0   | 0   | Se   | 2    | 0   | 0   | H          |
| B    | 3    | 0   | 0   | P    | 3    | 0   | 0   | Br   | 1    | 0   | 0   | Na         |
| C    | 4    | 0   | 25  | S    | 2    | 0   | 0   | Ru   | 2    | 0   | 0   | NH4        |
| N    | 3    | 0   | 5   | Cl   | 1    | 0   | 0   | Sb   | 3    | 0   | 0   |            |
| O    | 2    | 0   | 5   | Fe   | 2    | 0   | 0   | I    | 3    | 0   | 0   |            |
| F    | 1    | 0   | 3   | Ni   | 2    | 0   | 0   | Ir   | 3    | 0   | 0   |            |
| Na   | 1    | 0   | 0   | Cu   | 2    | 0   | 0   | Pt   | 2    | 0   | 0   |            |

Error Margin (ppm): 100  
 HC Ratio: 0.0 - 100.0  
 Max Isotopes: all  
 MSn Iso RI (%): 75.00

DBE Range: -100.0 - 100.0  
 Apply N Rule: no  
 Isotope RI (%): 1.00  
 MSn Logic Mode: OR

Electron Ions: both  
 Use MSn Info: yes  
 Isotope Res: 10000  
 Max Results: 100

Event#: 1 MS(E+) Ret. Time : 0.880 Scan#: 133

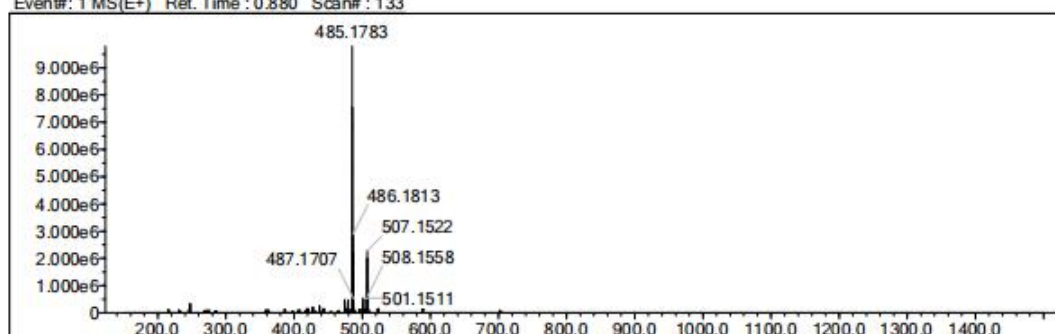

Measured region for 485.1783 m/z

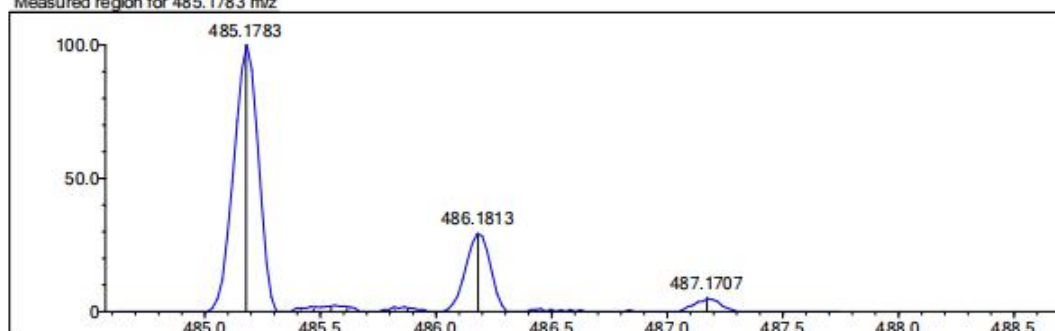

C25 H23 N4 O3 F3 [M+H]<sup>+</sup> : Predicted region for 485.1795 m/z

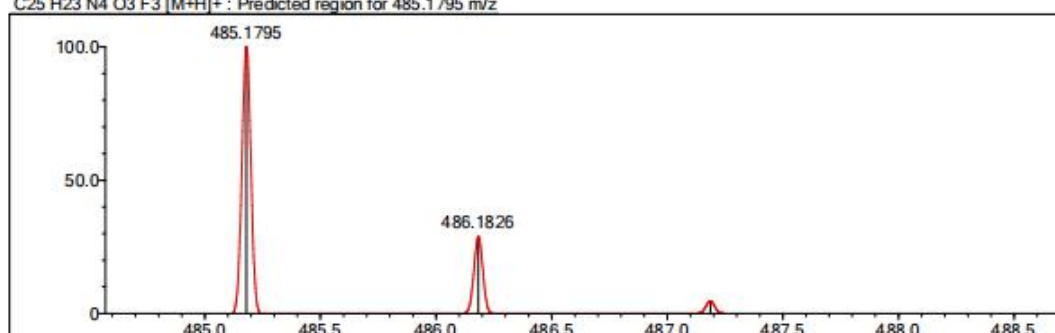

| Rank | Score | Formula (M)      | Ion                | Meas. m/z | Pred. m/z | Df. (mDa) | Df. (ppm) | Iso   | DBE  |
|------|-------|------------------|--------------------|-----------|-----------|-----------|-----------|-------|------|
| 2    | 73.54 | C25 H23 N4 O3 F3 | [M+H] <sup>+</sup> | 485.1783  | 485.1795  | -1.2      | -2.47     | 76.34 | 15.0 |

### 3. Chiral Resolution of Compound 11h

Considering the effect of chiral structure on the biological activity of compounds, the chiral isomers **(-)-11h** and **(+)-11h** were prepared by the separation of **11h** with chiral HPLC. The chiral resolution of compound **11h** was performed using Gilson instruments, and the chromatographic column was a CHIRALPAK®IF column (250 mm × 4.6 mm, 5 μm). The compound was filtered with a microporous membrane with an injection volume of 5 μL, and the mobile phase was Hex/EtOH = 80:20. The eluent was ultrasonically degassed for 30 min before use. Flow rate: 1 mL/min; Cycle time: 40 min. the chiral isomers **(-)-11h** ( $[\alpha]_D^{20} = -46.7$  (c 1.0, THF),  $t_R = 24.847$  min, ee value, > 99%) and **(+)-11h** ( $[\alpha]_D^{20} = +46.5$  (c 1.0, THF),  $t_R = 33.976$  min, ee value, > 99%) were prepared by the separation of **(±)-11h** with chiral HPLC.

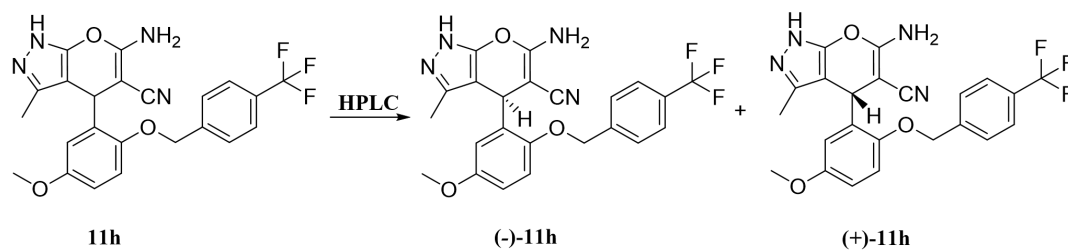

**Scheme 1.** Reagents and conditions: AD-H column. Mobile phase: hex: EtOH=80:20, flow rate: 1 mL/min.

**stereoisomers separation HPLC chromatogram.**

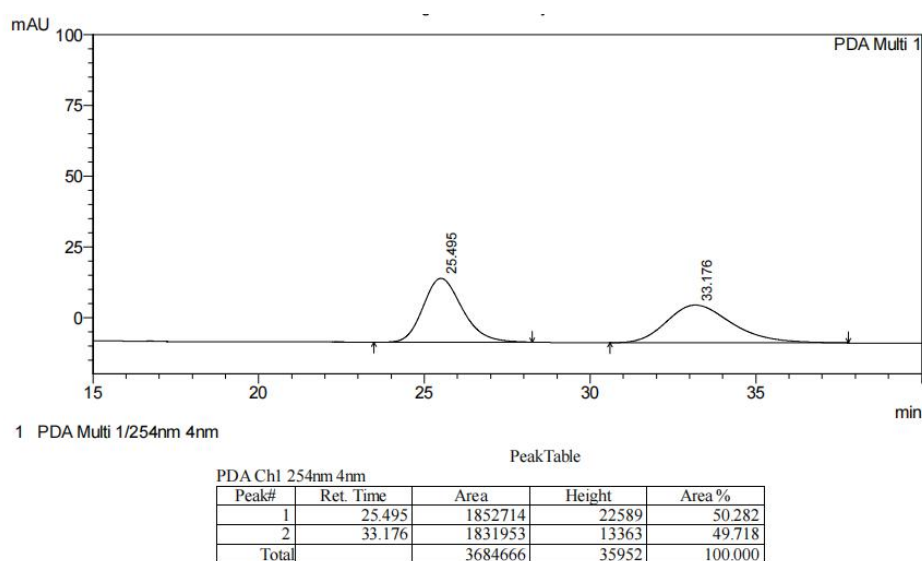

**HPLC chromatogram of (±)-11h**

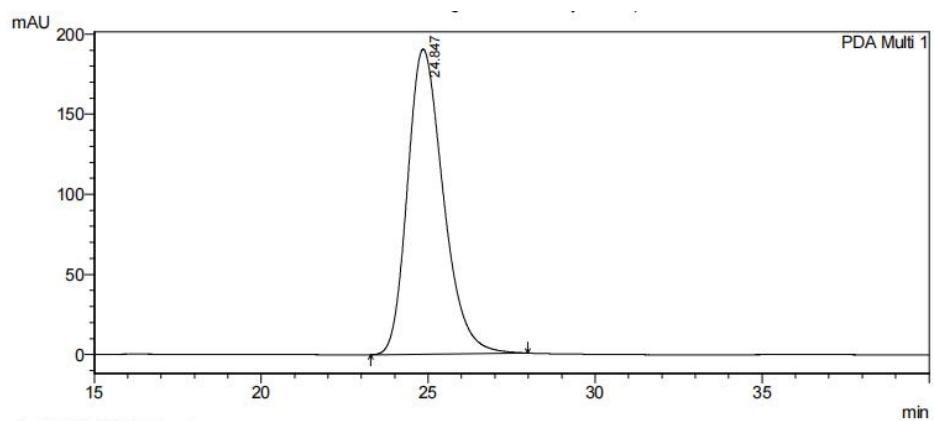

PeakTable

| Peak# | Ret. Time | Area     | Height | Area %  |
|-------|-----------|----------|--------|---------|
| 1     | 24.847    | 14198971 | 190395 | 100.000 |
| Total |           | 14198971 | 190395 | 100.000 |

### HPLC chromatogram of (-)-11h

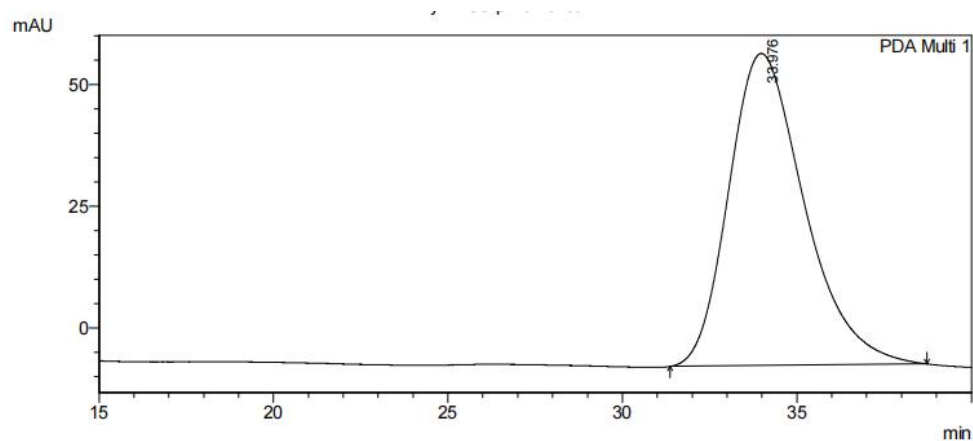

PeakTable

| Peak# | Ret. Time | Area    | Height | Area %  |
|-------|-----------|---------|--------|---------|
| 1     | 33.976    | 9647987 | 64117  | 100.000 |
| Total |           | 9647987 | 64117  | 100.000 |

### HPLC chromatogram of (+)-11h
